# Supplementary material for: A national cohort study evaluating infant and fetal mortality caused by birth defects in Korea
Source: PubMed Central journal article supplement — BMJ Open. 2017 Nov 15;7(11):e017963. doi: 10.1136/bmjopen-2017-017963 (PMC5695452; doi:10.1136/bmjopen-2017-017963), 2017-11-15
Supplement: bmjopen-2017-017963.draft_revisions.pdf [file bmjopen-2017-017963.draft_revisions.pdf]

# BMJ Open

BMJ Open is committed to open peer review. As part of this commitment we make the peer review history of every article we publish publicly available.

When an article is published we post the peer reviewers' comments and the authors' responses online. We also post the versions of the paper that were used during peer review. These are the versions that the peer review comments apply to.

The versions of the paper that follow are the versions that were submitted during the peer review process. They are not the versions of record or the final published versions. They should not be cited or distributed as the published version of this manuscript.

BMJ Open is an open access journal and the full, final, typeset and author-corrected version of record of the manuscript is available on our site with no access controls, subscription charges or pay-per-view fees (<http://bmjopen.bmj.com>).

If you have any questions on BMJ Open's open peer review process please email [editorial.bmjopen@bmj.com](mailto:editorial.bmjopen@bmj.com)

# BMJ Open

## Infant and fetal mortality caused by birth defects in Korea

|                                 |                                                                                                                                                                                                                                                                                                                                                                                                                                                                |
|---------------------------------|----------------------------------------------------------------------------------------------------------------------------------------------------------------------------------------------------------------------------------------------------------------------------------------------------------------------------------------------------------------------------------------------------------------------------------------------------------------|
| Journal:                        | <i>BMJ Open</i>                                                                                                                                                                                                                                                                                                                                                                                                                                                |
| Manuscript ID                   | bmjopen-2017-017963                                                                                                                                                                                                                                                                                                                                                                                                                                            |
| Article Type:                   | Research                                                                                                                                                                                                                                                                                                                                                                                                                                                       |
| Date Submitted by the Author:   | 29-May-2017                                                                                                                                                                                                                                                                                                                                                                                                                                                    |
| Complete List of Authors:       | Ko, Hyun Sun; Catholic University of Korea School of Medicine, Chung, Yoohyun; Catholic University of Korea School of Medicine Wie, Jeong Ha; Catholic University of Korea School of Medicine Choi, Sae Kyung; Catholic University of Korea School of Medicine Park, In Yarg; Catholic University of Korea School of Medicine Park, Yong Gyu; Catholic University of Korea School of Medicine Shin, Jong Chul; Catholic University of Korea School of Medicine |
| <b>Primary Subject Heading</b>: | Epidemiology                                                                                                                                                                                                                                                                                                                                                                                                                                                   |
| Secondary Subject Heading:      | Obstetrics and gynaecology, Health policy, Public health                                                                                                                                                                                                                                                                                                                                                                                                       |
| Keywords:                       | birth defect, infant, fetal, mortality, maternal age                                                                                                                                                                                                                                                                                                                                                                                                           |
|                                 |                                                                                                                                                                                                                                                                                                                                                                                                                                                                |

SCHOLARONE™  
Manuscripts

# 1 Infant and fetal mortality caused by birth defects in Korea

2 Hyun Sun Ko,<sup>1</sup> Yoohyun Chung,<sup>1</sup> Jeong Ha Wie,<sup>1</sup> Sae Kyung Choi,<sup>1</sup> In Yang Park,<sup>1</sup> Yong-gyu  
3 Park,<sup>2</sup> Jong Chul Shin<sup>1</sup>

4  
5 <sup>1</sup>Department of Obstetrics and Gynecology, College of Medicine, The Catholic University of  
6 Korea, Seoul, Republic of Korea

7 <sup>2</sup>Department of Biostatistics, College of Medicine, The Catholic University of Korea, Seoul,  
8 Republic of Korea

9  
10  
11 \*Corresponding Author: Jong Chul Shin

12 Department of Obstetrics and Gynecology, Seoul St. Mary's Hospital, College of Medicine, The  
13 Catholic University of Korea, 222, Banpo-daero, Seocho-gu, Seoul, 06591, Republic of Korea

14 Tel: +82-2-2258-6169, Fax: +82-2-595-1549, E-mail: jcshin@catholic.ac.kr

15 Key words; birth defect, infant death, fetal death, maternal age

16  
17 **Running title: Infant and fetal mortality caused by birth defects in Korea**

18 Tweetable abstract: Severe anomalies except chromosomal abnormality were the most prevalent  
19 in teenage pregnancies.

20 Key words: birth defect, infant, fetal, mortality, maternal age

1  
2  
3 21 Abstract  
4  
5

6 22 Objective: To analyze the prevalence of fetal and infant deaths due to birth defects in Korea and  
7  
8  
9 23 those trends according to maternal age.

10  
11 24 Design: Retrospective national cohort study

12  
13  
14  
15 25 Setting: Database in Korean vital Statistics, between 2009 and 2015.

16  
17  
18 26 Participants: 2,176 infant deaths and 4,343 fetal deaths caused by birth defects, among 3,181,145  
19  
20 27 total live births and 43,385 fetal deaths during study periods

21  
22  
23 28 Methods: Infant and fetal mortality rates (IMRs and FMRs) by birth defects, from deaths caused  
24  
25  
26 29 by birth defects, were analyzed. Those were compared, according to maternal age groups; '10-19  
27  
28 30 yr' (I), '20-29 yr' (II), '30-34 yr' (III), '35-39 yr' (IV), and '40-55 yr' (V).

29  
30  
31 31 Main Outcome Measures: IMRs and FMRs by birth defects and comparison according to  
32  
33 32 maternal age group.

34  
35  
36 33 Results: IMRs and FMRs by birth defects were 6.84 per 10,000 live births, and 13.47 per 10,000  
37  
38 34 total births. The most common causes of infant deaths and fetal deaths by birth defect were  
39  
40  
41 35 anomaly of circulatory system (51.1%, IMR 3.5) and chromosomal abnormality (33.1%, FMR  
42  
43 36 4.46), respectively. Among groups by maternal age, FMRs by birth defects were significantly  
44  
45  
46 37 higher in group I and V, compared to it in group III, (Odd ratio (OR) 6.59, 95% CI 3.49-12.43  
47  
48 38 and 3.46, 95% CI 1.77-6.78, respectively). IMR and FMR by nervous system anomaly were  
49  
50  
51 39 significantly higher in group I, with 3.63 (OR 2.0, 95% CI 1.97-2.03) and 29.84 (OR15.04, 95%  
52  
53 40 CI 3.59-62.96), compared to 0.32 and 1.97 in group III.  
54  
55  
56  
57  
58  
59  
60

1  
2  
3 41 Conclusion: FMRs by birth defects were the highest in extreme maternal age groups. Severe  
4  
5 42 anomalies except chromosomal abnormality were the most prevalent in teenage pregnancies.  
6  
7  
8  
9 43

#### 10 11 12 44 Strengths and limitations of this study

- 14 45 • This study is the first one that reports infant and fetal mortalities caused by birth defects  
15  
16 in Korea, from the national vital statistics.
- 17 46  
18  
19 47 • This study compared the infant and fetal mortalities caused by birth defects, according to  
20  
21 maternal age group, which showed higher prevalence of them in teenage pregnancies.  
22 48
- 23  
24 49 • The limitation of this study is that it does not show present prevalence of birth defects in  
25  
26 live births.  
27 50
- 28  
29 51 • This study supports a policy about mandatory folic acid fortification in Korea.  
30  
31 52

#### 32 33 34 53 **Introduction**

35  
36  
37 54 Birth defects (structural abnormalities, sensory changes, chromosomal abnormalities, metabolic  
38  
39 abnormalities, and neurodevelopmental defects) are presented in approximately 2-3% of all  
40 55  
41  
42 56 births [1-3]. Severe birth defects account for 20-25% of perinatal mortality and they are leading  
43  
44 causes of infant mortality, abortion, and stillbirth [2-5]. During the last decade, screening tests  
45 57  
46 and ultrasonography during pregnancy have been developed to detect birth defects. However,  
47 58  
48 etiologies of 60-70% of birth defects remain unknown.  
49 59

50  
51  
52 60 In developed countries, birth defects surveillance systems have been developed to collect data on  
53  
54  
55  
56  
57  
58  
59  
60

1  
2  
3 61 major structural birth defects and chromosomal abnormalities [6-8]. European registry reported  
4  
5 62 that total and live birth prevalence of trisomies 21, 18 and 13 were increased between 1990 and  
6  
7  
8 63 2009, and those were mainly associated with increasing maternal age [9].  
9

10  
11 64 While the number of live births in Korea has been decreased, maternal age has been increased  
12  
13 65 [10, 11]. The prevalence of birth defects in Korean live births has been reported before, using the  
14  
15 66 data based on the National Health Insurance Corporation on medical institutes across the country  
16  
17 67 [12, 13]. However, it is important to include stillbirths and abortions in birth defects statistics  
18  
19 68 with total live births because birth defects occur during intrauterine life. Although it is hard to  
20  
21 69 include spontaneous abortion in the early stage of pregnancy, the investigation of fetal death  
22  
23 70 related with birth defect can be useful for estimating the prevalence of birth defects. In addition,  
24  
25 71 investigation of infant death related to birth defect can be valuable information for counseling  
26  
27 72 parents, antenatally and postnatally.  
28  
29  
30  
31  
32

33 73 The aim of this study was to analyze the prevalence of fetal and infant deaths associated with  
34  
35 74 birth defects, which are fetal/infant mortality rates (FMR/IMR) by birth defect, and evaluate  
36  
37 75 changes of those prevalence rates, according to maternal age.  
38  
39  
40

## 41 **Materials and Methods**

42  
43  
44 77 This study was conducted by utilizing deidentified data about fetal deaths, infant deaths, and live  
45  
46 78 births between 2009 and 2015 from 'Korean Vital Statistics' of the Korean Statistical  
47  
48 79 Information Service [10]. Korean Vital Statistics is a nationwide database developed to  
49  
50 80 understand birth, death, marriage, and divorce in Korea. Data from Korean Vital Statistics are  
51  
52 81 released monthly and annually via a press release, on website (<http://kosis.kr>), and in online  
53  
54 82 publications, such as 'Annual Report on Vital Statistics.' From fetal and infant deaths data, fetal  
55  
56  
57  
58  
59  
60

1  
2  
3 83 and infant death recorded as ‘a death caused by birth defect’ were included in fetal and infant  
4  
5 84 deaths associated with birth defect. Fetal death was defined as intrauterine fetal death occurring  
6  
7  
8 85 after 16 weeks of gestational age and before the start of delivery or those occurring during labor.  
9  
10 86 Infant death was defined as a death occurring within the first year of life.  
11  
12  
13 87 Birth defects were categorized by birth defect group (the system affected) and subtype  
14  
15 (individual disease) according to the 10th Revision of the International Classification of Diseases  
16 88 (ICD-10) and were investigated by including major groups of birth defects managed by  
17 89 EUROCAT, ICBDSR, and the National Birth Defects Prevention Network (NBDPN). Deaths  
18 90 caused by disease code ‘Q’ representing congenital disease were defined as fetal and infant  
19 91 deaths related TO birth defect. According to the above standards, 2,176 infant deaths and 4,343  
20 92 fetal deaths were caused by birth defect. This study calculated IMR by birth defects by dividing  
21 93 the number of infant deaths related to birth defects by the total number of live births. It was  
22 94 presented as the number per 10,000 live births as a standard. FMR by birth defects was  
23 95 calculated by dividing the number of fetal deaths related with birth defect by the total number of  
24 96 live births and fetal deaths, which presented as the number per 10,000 total births. Maternal age  
25 97 groups were divided to the following five groups: ‘10-19 yr’ (I), ‘20-29 yr’ (II), ‘30-34 yr’ (III),  
26 98 ‘35-39 yr’ (IV), and ‘40-55 yr’ (V). IMRs and FMRs by birth defects in group III were used as  
27 99 control for comparison with IMRs/FMRs of other groups. For chromosomal abnormalites,  
28 100 comparison was also performed between group II and the other groups.  
29  
30  
31  
32  
33  
34  
35  
36  
37  
38  
39  
40  
41  
42  
43  
44  
45  
46  
47  
48  
49  
50  
51  
52  
53  
54  
55  
56  
57  
58  
59  
60

## 103 **Statistical analysis**

1  
2  
3 104 Statistical calculations were performed using SPSS version 24.0 (SPSS Inc., Chicago, IL, USA),  
4  
5 105 including means, proportions, odd ratio (OR), and 95% confidence intervals (CIs). Chi-square  
6  
7  
8 106 tests were performed to compare proportions of independent variables and t-tests were performed  
9  
10  
11 107 to compare means. Statistical significance was considered at  $P < 0.05$  or if the 95% CI of OR did  
12  
13 108 not include 1.

### 14 15 16 109 **Ethics statement**

17  
18  
19 110 The study protocol was approved by the institutional review boards of Catholic University of  
20  
21 111 Korea. Informed consent was waived by the board.  
22  
23  
24 112  
25  
26  
27 113  
28  
29  
30 114  
31  
32  
33 115  
34  
35

## 36 116 **Results**

### 37 38 39 117 **Baseline characteristics**

40  
41  
42 118 Total numbers of live births and fetal deaths in Korea from 2009 to 2015 were 3,181,145 and  
43  
44 119 43,385, respectively. Among 9,563 infant deaths during the 7 years, the number of infant deaths  
45  
46  
47 120 related to birth defect was 2,176, accounting for 22.8% of all infant deaths. The number of fetal  
48  
49  
50 121 deaths related to birth defects was 4,343, accounting for 10.0% of all fetal deaths. Baseline  
51  
52 122 demographic characteristics are summarized in Table 1.  
53  
54  
55 123



### 124 **IMRs, by birth defect groups and subtypes**

125 IMR by total birth defects was 6.84 per 10,000 live births (Table 2). Anomaly of the circulatory  
126 system was the most common cause of infant deaths related to birth defect, accounting for 51.1%  
127 of all infant deaths. Its IMR was 3.5 per 10,000 live births. The next most common defects in  
128 infant deaths were chromosomal anomalies (0.69 per 10,000 live births, 10.1%) and  
129 musculoskeletal system anomalies (0.65 per 10,000 live births, 9.6%). Among subtypes of birth  
130 defects, congenital diaphragmatic hernia (CDH) showed the highest IMR at 0.43 per 10,000 live  
131 births (Table 3). Among specified anomalies, lethal birth defects with the next highest IMRs  
132 were Tetralogy of Fallot (TOF) and hypoplastic left heart syndrome (HLHS) (with IMRs of 0.28  
133 and 0.27 per 10,000 live births, respectively). Because patent ductus arteriosus cases included 81  
134 cases whose birthweight was less than 2,500 g, patent ductus arteriosus was not counted as the  
135 next common birth defect. Among chromosomal anomalies, Down syndrome was the most  
136 common chromosomal abnormality with IMR of 0.27 per 10,000 live births (Table 4).

137

138

### 139 **FMRs by birth defect groups and subtypes**

140 FMR by total birth defects was 13.47 per 10,000 total births (live births plus stillbirths) (Table 2).  
141 The most common defects by group were chromosomal anomalies, accounting for 33.1% of fetal  
142 deaths related to birth defect, and its FMR was 4.46 per 10,000 total births. The most common  
143 birth defect subtype in fetal deaths was Down syndrome with FMR of 1.78 per 10,000 total  
144 births, and followed by other chromosomal abnormality, unspecified congenital heart

1  
2  
3 145 malformation, and Edward syndrome, with FMR of 1.36, 0.93 and 0.82 per 10,000 total births,  
4  
5 146 respectively (Table 3&4).  
6  
7

### 8 9 147 **IMRs and FMRs by birth defect groups, according to the maternal age group**

10  
11 148 In the analysis according to maternal age group, 2,529 live births, 113 fetal deaths not related to  
12  
13 149 birth defects, and 12 fetal deaths related to birth defects were excluded due to missing values of  
14  
15 150 maternal age. In infant deaths related to birth defect, anomaly of the circulatory system was most  
16  
17 151 common in all age groups (Table 5, Figure 1). IMRs of chromosomal abnormality seemed to be  
18  
19 152 increased in groups IV and V compared to that in group III. However, statistically significant  
20  
21 153 difference was only observed between group V and group III (OR 2.00 95% CI 1.97-2.03). The  
22  
23 154 IMR of nervous system anomaly was significantly higher in the youngest maternal age group  
24  
25 155 (group I, 10-19 yr) with 3.63 per 10,000 live births (OR 2.0, 95% CI 1.97-2.03), compared to  
26  
27 156 that in group III (0.32 per 10,000 live births). In fetal deaths related to birth defect, most FMRs  
28  
29 157 by birth defects were highest in the youngest group, except for FMR by chromosomal  
30  
31 158 abnormality which was significantly higher in group V compared to that in group III (OR 7.01,  
32  
33 159 95% CI, 2.09-23.52) (Table 6, Figure 2). Compared to FMR of group II, FMRs of chromosomal  
34  
35 160 abnormality were significantly higher in group IV and V (OR 5.00, 95% CI, 1.10-22.84 and OR  
36  
37 161 10.52, 95% CI 2.47-44.88, respectively). FMRs by total birth defects were significantly higher in  
38  
39 162 group I and V, compared to that in group III, (OR 6.59, 95% CI 3.49-12.43 and OR 3.46, 95% CI  
40  
41 163 1.77-6.78, respectively). Individually, FMRs for anomalies of nervous system and cardiovascular  
42  
43 164 system, and, other and unspecified anomalies were significantly higher in group I, compared to  
44  
45 165 those in group III, (OR 15.04, 95% CI 3.59-62.96; OR 10, 95%CI 1.23-78.2, and OR 8.35, 95%  
46  
47 166 CI 2.52-27.67, respectively)  
48  
49  
50  
51  
52  
53  
54  
55  
56  
57  
58  
59  
60

167

168 **Discussion**

169 It is important to know severe birth defects which can lead fetal and infant deaths and its  
170 prevalence. Previously, the prevalence of birth defects in Korea in live births in 2005 and 2006  
171 was reported to be approximately 2.9% [12], similar to those (2-3%) of other studies [1-3].  
172 However, the other study reported the prevalence of birth defects in Korea in 2009 and 2010 as  
173 5.8% [13]. Although there might be methodological limitation and variations, the prevalence of  
174 birth defects in live births seems increasing. In this study, 22.8% of infant deaths of Korea were  
175 related to birth defects. IMR and FMR caused by birth defects between 2009 and 2015 were 6.84  
176 per 10,000 live births and 13.47 per 10,000 total births, respectively.

177 The most common birth defect group related to infant deaths was anomaly of the circulatory  
178 system. However, the most common birth defect subtype was CDH. Despite advances in prenatal  
179 diagnosis and neonatal intensive care including extracorporeal membrane oxygenation and  
180 inhaled nitric oxide use, mortality rates due to CDH remain high, ranging from 50% to 70% with  
181 great variability between centers [14-16]. The second most common birth defect in infant deaths  
182 related to birth defect was TOF. The 10-year survival rate of TOF has been reported to be  
183 approximately 95 % [17, 18]. When we consider the prevalence of TOF in live births in Korea  
184 with 4.1-4.2 per 10,000 live births [12, 13] and the IMR by TOF with 0.28 per 10,000 live births  
185 in this study, we can speculate that nationwide infant survival rates of TOF in Korea will be  
186 approximately 93.3%, which is similar to that in the other reports [17, 18].

187 As expected, when IMRs and FMRs caused by birth defects were compared according to  
188 maternal age group, IMRs and FMRs due to chromosomal abnormality were higher in older

1  
2  
3 189 maternal age groups (IV and V) compared to those in group II or III. FMRs due to birth defects  
4  
5 190 were significantly higher in groups I and V compared to those in group III (OR: 6.59, 95% CI:  
6  
7 191 3.49-12.43 and OR: 3.46, 95% CI: 1.77-6.78, respectively). FMR was much higher in group I.  
8  
9 192 Especially, IMR and FMR due to anomalies of the nervous system were significantly higher in  
10  
11 193 group I compared with those in group III, indicating higher prevalence of severe anomalies of  
12  
13 194 nervous system in teenage pregnancies. In North America, fortification of flour and grain  
14  
15 195 products became mandatory in 1998. Following folic acid fortification, prevalence of spina  
16  
17 196 bifida birth in Canada fell by over 50% and that of other neural tube defects (NTDs) fell by  
18  
19 197 approximately one-third [19]. In addition, the registry of 'European surveillance of congenital  
20  
21 198 anomalies' has concluded that mandatory folic acid fortification is needed because the  
22  
23 199 prevalence of NTDs has not decreased in Europe despite longstanding recommendations aiming  
24  
25 200 at promoting periconceptional folic acid supplementation [20]. Results of Cochrane databases  
26  
27 201 systematic review also showed a protective effect of daily folic acid supplementation in  
28  
29 202 preventing NTDs compared to no intervention/placebo or vitamins and minerals without folic  
30  
31 203 acid (risk ratio 0.31, 95% CI 0.17- 0.58); five studies; 6708 births; high quality evidence) [21].  
32  
33 204 Teenage pregnancies are more likely unplanned and exposed to alcohol, drug, sexual abuse, and  
34  
35 205 nutritional imbalance. When pregnancies are complicated by birth defects in young age, they  
36  
37 206 might lead to termination of pregnancy (TOP), more easily. This study demonstrated increasing  
38  
39 207 trends of IMRs and FMRs due to birth defects in the youngest and oldest maternal age groups.  
40  
41 208 However, high IMRs and FMRs due to birth defects in the youngest age group were more  
42  
43 209 pronounced except for chromosomal abnormality. Therefore, mandatory folic acid fortification  
44  
45 210 in Korea might help reduce nervous system anomalies because the youngest age group is less  
46  
47  
48  
49  
50  
51  
52  
53  
54  
55  
56  
57  
58  
59  
60

1  
2  
3 211 likely to take periconceptional folic acid supplementation and the overall prevalence of spina  
4  
5  
6 212 bifida in Korea shows increasing tendency [13].  
7  
8  
9 213 In Europe, increasing trend of trisomy 13, 18, and 21 between 1990 and 2009 was reported [9].  
10  
11 214 Because most TOPs with birth defects are illegal in Korea, it is almost impossible to estimate the  
12  
13 215 proportions of TOP due to birth defects among fetal deaths. An international study has reported  
14  
15  
16 216 that the total mean prevalence of Down syndrome (still births, live births, and TOP) is increased  
17  
18 217 from 13.1 to 18.2/10,000 births between 1993 and 2004 with increasing maternal age [22].  
19  
20  
21 218 However, the total mean prevalence of Down syndrome births remains stable at 8.3/10,000 births,  
22  
23 219 balanced by a great increase of TOP [22]. Maternal age at conception has increased in Korea,  
24  
25 220 although there are race/ethnic specific variations in birth defects [23]. IMR and FMR by Down  
26  
27 221 syndrome was 0.27 per 10,000 live births and 1.78 per 10,000 total births, respectively. When we  
28  
29  
30 222 assume the prevalence of Down syndrome in as 3.7-4.7 per 10,000 live births from the previous  
31  
32 223 studies in Korea [12, 13], infant survival rate of Down syndrome can be estimated approximately  
33  
34 224 93.6%. Based on the increased prevalence of Down syndrome in the international study,  
35  
36  
37 225 according to increasing maternal age [22], we can expect that TOP due to Down syndrome may  
38  
39  
40 226 be also considerable in Korea.  
41  
42 227 The limitation of this study is that it does not show present prevalence of birth defects in live  
43  
44 228 births. Therefore, it is necessary to establish a comprehensive surveillance system with periodic  
45  
46 229 production of data and monitoring to have effective prevention and management of birth defects.  
47  
48  
49 230 The second limitation of this study is that death cause of death registry is mostly made by  
50  
51 231 clinician without autopsy. Because one or two disease codes are registered as the main code in  
52  
53 232 death registry, multiple anomalies might have been included in one category. Lastly, this study  
54  
55  
56 233 did not include data on maternal nationality, paternal age, educational background, antenatal care,

1  
2  
3 234 or parents' occupation due to high rates of missing values. However, this study is the first one  
4  
5 235 that reports IMRs and FMRs caused by birth defects in Korea and different patterns according to  
6  
7  
8 236 maternal age group. Severe birth defects with high FMR were found to be more common in  
9  
10 237 extreme maternal age groups (the youngest and the oldest). Except chromosomal abnormality,  
11  
12 238 most severe anomalies, especially those of the nervous system and cardiovascular system, were  
13  
14  
15 239 more common in teenage pregnancies.  
16

17 240 As maternal age at conception is getting increased in Korea and screening tools are developing,  
18  
19 241 prevalence and prenatal diagnosis of chromosomal anomalies are likely to be increased. Multi-  
20  
21 242 disciplinary cooperation among government, politician, clinicians, and non-governmental  
22  
23 243 organization is urgent not only for increasing fertility rate, but also for increasing healthy  
24  
25 244 pregnancies with effective prevention and management of birth defects, especially for extreme  
26  
27 245 maternal age groups and for supporting complicated pregnancies. A mandatory folic acid  
28  
29 246 fortification needs to be discussed and considered in Korea.  
30  
31  
32  
33  
34  
35 247  
36  
37

### 38 248 **Author contributions**

39  
40 249 We confirm that all the authors have made substantive intellectual contributions to the paper;  
41  
42 250 they understand their role in taking responsibility and being accountable for what is published.  
43  
44 251 JCS conceptualized and reviewed the paper. HSK conceptualized the paper, gathered the results,  
45  
46 252 analyzed the data and wrote the article. YHC, JHW, SKC, and IYP analyzed the data and  
47  
48 253 reviewed the paper. YGP performed statistical analysis of the data.  
49  
50  
51  
52 254

### 54 255 **Funding**

1  
2  
3 256 This study was supported by Research Fund of Seoul St. Mary's Hospital, The Catholic  
4  
5  
6 257 University of Korea.

7  
8 258

9  
10 259 **Conflict of Interest**

11  
12 260 All authors have no conflict of interest related with this article.

13  
14 261

15  
16  
17 262 **Details of ethics approval**

18  
19 263 We obtained approval from the institutional review boards of Catholic University of Korea.

20  
21 264

22  
23 265

24  
25 266

26  
27  
28  
29  
30  
31 267 **References**

32  
33  
34  
35 268 **1** Honein MA, Paulozzi LJ, Cragan JD, Correa A. Evaluation of selected characteristics of  
36  
37 269 pregnancy drug registries. *Teratology* 1999;60:356-64.

38  
39  
40 270 **2** Kalter H, Warkany J. Congenital malformations (second of two parts). *N Engl J Med*  
41  
42 271 1983;308:491-7.

43  
44 272 **3** Kalter H, Warkany J. Medical progress. Congenital malformations: etiologic factors and  
45  
46 273 their role in prevention (first of two parts). *N Engl J Med* 1983;308:424-31.

47  
48  
49 274 **4** Petrini J, Damus K, Russell R, Poschman K, Davidoff MJ, Mattison D. Contribution of  
50  
51 275 birth defects to infant mortality in the United States. *Teratology* 2002;66 Suppl 1:S3-6.

52  
53  
54 276 **5** Chung CS, Myriantopoulos NC. Congenital anomalies: mortality and morbidity, burden  
55  
56 277 and classification. *Am J Med Genet* 1987;27:505-23.

- 1  
2  
3 278 **6** Centers for Disease Control and Prevention (CDC). Improved national prevalence  
4  
5 279 estimates for 18 selected major birth defects--United States, 1999-2001. *MMWR Morb*  
6  
7 *Mortal Wkly Rep* 2006;54:1301-5.  
8  
9  
10 281 **7** Bower C, D'Antoine H, Stanley FJ. Neural tube defects in Australia: trends in  
11  
12 282 encephaloceles and other neural tube defects before and after promotion of folic acid  
13  
14 283 supplementation and voluntary food fortification. *Birth Defects Res A Clin Mol Teratol*  
15  
16 284 2009;85:269-73.  
17  
18  
19  
20 285 **8** Khoshnood B, Greenlees R, Loane M, Dolk H; on behalf of the EUROCAT Program  
21  
22 286 Management Committee; EUROCAT working group. Paper 2: EUROCAT public health  
23  
24 287 indicators for congenital anomalies in Europe. *Birth Defects Res A Clin Mol Teratol*  
25  
26 288 2011;91 Suppl 1:S16-22.  
27  
28  
29 289 **9** Loane M, Morris JK, Addor MC, Arriola L, Budd J, Doray B, et al. Twenty-year trends in  
30  
31 290 the prevalence of Down syndrome and other trisomies in Europe: impact of maternal age  
32  
33 291 and prenatal screening. *Eur J Hum Genet* 2013;21:27-33.  
34  
35  
36 292 **10** Statistics Korea. *Birth Statistics in 2009-2015*. Daejeon: Statistics Korea, 2009.  
37  
38  
39 293 **11** Choi SH, Park YS, Shim KS, Choi YS, Chang JY, Hahn WH, et al. Recent trends in the  
40  
41 294 incidence of multiple births and its consequences on perinatal problems in Korea. *J*  
42  
43 295 *Korean Med Sci* 2010;25:1191-6.  
44  
45  
46 296 **12** Kim MA, Yee NH, Choi JS, Choi JY, Seo K. Prevalence of birth defects in Korean  
47  
48 297 livebirths, 2005-2006. *J Korean Med Sci* 2012;27:1233-40.  
49  
50  
51 298 **13** Lamichhane DK, Leem JH, Park M, Kim JA, Kim HC, Kim JH, Hong YC. Increased  
52  
53 299 prevalence of some birth defects in Korea, 2009-2010. *BMC Pregnancy Childbirth*. 2016  
54  
55 300 Mar 22;16:61. doi: 10.1186/s12884-016-0841-z  
56  
57  
58  
59  
60



- 1  
2  
3 301 **14** Park HW, Lee BS, Lim G, Choi YS, Kim EA, Kim KS. A simplified formula using early  
4  
5 302 blood gas analysis can predict survival outcomes and the requirements for extracorporeal  
6  
7 303 membrane oxygenation in congenital diaphragmatic hernia. *J Korean Med Sci*  
8  
9 304 2013;28:924-8.
- 10  
11  
12 305 **15** Campbell BT, Herbst KW, Briden KE, Neff S, Ruscher KA, Hagadorn JI. Inhaled nitric  
13  
14 306 oxide use in neonates with congenital diaphragmatic hernia. *Pediatrics* 2014;134:e420-6.
- 15  
16  
17 307 **16** Lee JY, Jun JK, Lee J. Prenatal prediction of neonatal survival in cases diagnosed with  
18  
19 308 congenital diaphragmatic hernia using abdomen-to-thorax ratio determined by  
20  
21 309 ultrasonography. *J Obstet Gynaecol Res* 2014;40:2037-43.
- 22  
23  
24 310 **17** Kim H, Sung SC, Kim SH, Chang YH, Lee HD, Park JA, et al. Early and late outcomes  
25  
26 311 of total repair of tetralogy of Fallot: risk factors for late right ventricular dilatation.  
27  
28 312 *Interact Cardiovasc Thorac Surg* 2013;17:956-62.
- 29  
30  
31 313 **18** Park CS, Lee JR, Lim HG, Kim WH, Kim YJ. The long-term result of total repair for  
32  
33 314 tetralogy of Fallot. *Eur J Cardiothorac Surg* 2010;38:311-7.
- 34  
35  
36 315 **19** De Wals P, Tairou F, Van Allen MI, Uh SH, Lowry RB, Sibbald B, et al. Reduction in  
37  
38 316 neural-tube defects after folic acid fortification in Canada. *N Engl J Med* 2007;357:135-  
39  
40 317 42.
- 41  
42  
43 318 **20** Khoshnood B, Loane M, de Walle H, Arriola L, Addor MC, Barisic I, et al. Long term  
44  
45 319 trends in prevalence of neural tube defects in Europe: population based study. *Bmj*  
46  
47 320 2015;351:h5949.
- 48  
49  
50 321 **21** De-Regil LM, Pena-Rosas JP, Fernandez-Gaxiola AC, Rayco-Solon P. Effects and safety  
51  
52 322 of periconceptional oral folate supplementation for preventing birth defects. *Cochrane*  
53  
54 323 *Database Syst Rev* 2015:CD007950.

- 1  
2  
3 324 **22** Cocchi G, Gualdi S, Bower C, Halliday J, Jonsson B, Myrelid A, et al. International  
4  
5 trends of Down syndrome 1993-2004: Births in relation to maternal age and terminations  
6 325  
7 of pregnancies. *Birth Defects Res A Clin Mol Teratol* 2010;88:474-9.  
8 326  
9  
10 327 **23** Canfield MA, Honein MA, Yuskiv N, Xing J, Mai CT, Collins JS, et al. National  
11  
12 estimates and race/ethnic-specific variation of selected birth defects in the United States,  
13 328  
14 1999-2001. *Birth Defects Res A Clin Mol Teratol* 2006;76:747-56.  
15 329  
16  
17  
18  
19  
20  
21  
22  
23  
24  
25  
26  
27  
28  
29  
30  
31  
32  
33  
34  
35  
36  
37  
38  
39  
40  
41  
42  
43  
44  
45  
46  
47  
48  
49  
50  
51  
52  
53  
54  
55  
56  
57  
58  
59  
60

1  
2  
3  
4  
5  
6  
7  
8  
9  
10  
11  
12  
13  
14  
15  
16  
17  
18  
19  
20  
21  
22  
23  
24  
25  
26  
27  
28  
29  
30  
31  
32  
33  
34  
35  
36  
37  
38  
39  
40  
41  
42  
43  
44  
45  
46  
47  
48  
49

Table 1. Demographic characteristics of total live births, total fetal deaths, total infant deaths, and fetal/infant deaths related with birth defect

| Parameters              | Total live births | Total fetal deaths | Total infant deaths | Infant deaths<br>by birth defects | Fetal deaths<br>by birth defects |
|-------------------------|-------------------|--------------------|---------------------|-----------------------------------|----------------------------------|
|                         | n=3,181,145       | n=43,385           | n=9563              | n=2,176                           | n=4,343                          |
| Maternal age (yr)       | 31.85 ± 26.72     | 30.69 ± 6.16       | 31.57 ± 4.97        | 31.68 ± 4.86                      | 21.2 ± 4.42                      |
| Gestational age (weeks) | 38.58 ± 2.3       | 20.13 ± 5.83       | 32.24 ± 6.453       | 35.88 ± 4.36                      | 31.8 ± 5.59                      |
| Birthweight (kg)        | 3.21 ± 0.48       | 0.69 ± 0.78        | 1.96 ± 1.15         | 2.47 ± 0.87                       | 0.51 ± 0.5                       |
| Multiple birth n (%)    | 101,797 (3.2)     | 3,818 (8.8)        | 1492 (15.6)         | 196 (9)                           | 200 (4.6)                        |

Data are mean ± standard deviation or no. (%) unless otherwise specified.

Table 2. Korean prevalence of fetal deaths and infant deaths caused by birth defect groups in 2009-2015

| Birth defects (ICD-10)             | Total N. of fetal and infant deaths caused by birth defect | Proportion (%) in birth defects | Prevalence per 10,000 live births and fetal deaths | N. of infant deaths caused by birth defect | Proportion (%) in birth defects | Prevalence per 10,000 live births | N. of fetal deaths caused by birth defect | Proportion (%) in birth defects | Prevalence per 10,000 total births |
|------------------------------------|------------------------------------------------------------|---------------------------------|----------------------------------------------------|--------------------------------------------|---------------------------------|-----------------------------------|-------------------------------------------|---------------------------------|------------------------------------|
| Nervous system (Q00-07)            | 970                                                        | 14.88                           | 3.01                                               | 136                                        | 6.25                            | 0.43                              | 834                                       | 19.20                           | 2.59                               |
| Eye, ear, face and neck (Q10-18)   | 8                                                          | 0.12                            | 0.02                                               | 1                                          | 0.05                            | 0.00                              | 7                                         | 0.16                            | 0.02                               |
| Circulatory system (Q20-28)        | 1605                                                       | 24.62                           | 4.98                                               | 1112                                       | 51.10                           | 3.50                              | 493                                       | 11.35                           | 1.53                               |
| Respiratory system (Q30-34)        | 115                                                        | 1.76                            | 0.36                                               | 87                                         | 4.00                            | 0.27                              | 28                                        | 0.64                            | 0.09                               |
| Cleft lip/ palate (Q35-37)         | 67                                                         | 1.03                            | 0.21                                               | 3                                          | 0.14                            | 0.01                              | 64                                        | 1.47                            | 0.20                               |
| Digestive system (Q38-45)          | 203                                                        | 3.11                            | 0.63                                               | 169                                        | 7.77                            | 0.53                              | 34                                        | 0.78                            | 0.11                               |
| Genital organs (Q50-56)            | 5                                                          | 0.08                            | 0.02                                               | 0                                          | 0.00                            | 0.00                              | 5                                         | 0.12                            | 0.02                               |
| Urinary system (Q60-64)            | 213                                                        | 3.27                            | 0.66                                               | 54                                         | 2.48                            | 0.17                              | 159                                       | 3.66                            | 0.49                               |
| Musculoskeletal system (Q65-79)    | 384                                                        | 5.89                            | 1.19                                               | 208                                        | 9.56                            | 0.65                              | 176                                       | 4.05                            | 0.55                               |
| Other and unspecified (Q80-89)     | 1291                                                       | 19.80                           | 4.00                                               | 186                                        | 8.55                            | 0.58                              | 1105                                      | 25.44                           | 3.43                               |
| Chromosomal abnormalities (Q90-99) | 1658                                                       | 25.43                           | 5.14                                               | 220                                        | 10.11                           | 0.69                              | 1438                                      | 33.11                           | 4.46                               |
| Total                              | 6519                                                       | 100.00                          | 20.22                                              | 2176                                       | 100.00                          | 2.64                              | 4343                                      | 100.00                          | 13.47                              |

ICD, International classification of diseases, 10th revision.

1  
2  
3  
4  
5  
6  
7  
8  
9  
10  
11  
12  
13  
14  
15  
16  
17  
18  
19  
20  
21  
22  
23  
24  
25  
26  
27  
28  
29  
30  
31  
32  
33  
34  
35  
36  
37  
38  
39  
40  
41  
42  
43  
44  
45  
46  
47  
48  
49

Table 4. Prevalence of infant and fetal deaths caused by major chromosomal abnormalities in Korea, 2009-2015

| Chromosomal birth defects             | Total N. of cases         | Proportion                 | Prevalence                | N. of infant deaths       | Proportion                 | Prevalence               | N. of fetal deaths        | Proportion                 | Prevalence                |
|---------------------------------------|---------------------------|----------------------------|---------------------------|---------------------------|----------------------------|--------------------------|---------------------------|----------------------------|---------------------------|
|                                       | caused by<br>birth defect | (%) in<br>birth<br>defects | per 10000<br>total births | caused by<br>birth defect | (%) in<br>birth<br>defects | per 10000<br>live births | caused by<br>birth defect | (%) in<br>birth<br>defects | per 10000<br>total births |
| Down's syndrome                       | 659                       | 10.11                      | 2.04                      | 85                        | 3.91                       | 0.27                     | 574                       | 13.22                      | 1.78                      |
| Trisomy 18                            | 340                       | 5.22                       | 1.05                      | 76                        | 3.49                       | 0.24                     | 264                       | 6.08                       | 0.82                      |
| Trisomy 13                            | 62                        | 0.95                       | 0.19                      | 21                        | 0.97                       | 0.07                     | 41                        | 0.94                       | 0.13                      |
| Klinefelter's syndrome                | 33                        | 0.51                       | 0.10                      | 0                         | 0.00                       | 0.00                     | 33                        | 0.76                       | 0.10                      |
| Turner's syndrome                     | 51                        | 0.78                       | 0.16                      | 0                         | 0.00                       | 0.00                     | 51                        | 1.17                       | 0.16                      |
| Other sex chromosome<br>abnormalities | 14                        | 0.21                       | 0.04                      | 0                         | 0.00                       | 0.00                     | 14                        | 0.32                       | 0.04                      |
| Triploidy                             | 14                        | 0.21                       | 0.04                      | 0                         | 0.00                       | 0.00                     | 14                        | 0.32                       | 0.04                      |
| Wolff-Hirschorn syndrome              | 5                         | 0.08                       | 0.02                      | 2                         | 0.09                       | 0.01                     | 3                         | 0.07                       | 0.01                      |
| Cri-du-chat syndrome                  | 5                         | 0.08                       | 0.02                      | 2                         | 0.09                       | 0.01                     | 3                         | 0.07                       | 0.01                      |
| Other chromosomal abnormalities       | 475                       | 7.29                       | 1.47                      | 34                        | 1.56                       | 0.11                     | 441                       | 10.15                      | 1.37                      |
| Total                                 | 1658                      | 25.43                      | 5.14                      | 220                       | 10.11                      | 0.69                     | 1438                      | 33.11                      | 4.46                      |

Table 5. Comparison of infant mortality by birth defect according to maternal age group

| Maternal age group                 | IMR               |                      |                    |                   |                     |                    |                   |                   |                      |
|------------------------------------|-------------------|----------------------|--------------------|-------------------|---------------------|--------------------|-------------------|-------------------|----------------------|
|                                    | I<br>(10-19<br>y) | OR<br>(95% CI)       | II<br>(20-29<br>y) | OR<br>(95%<br>CI) | III<br>(30-34<br>y) | IV<br>(35-39<br>y) | OR<br>(95%<br>CI) | V<br>(40-50<br>y) | OR<br>(95%<br>CI)    |
| Birth defects (ICD-10)             |                   |                      |                    |                   |                     |                    |                   |                   |                      |
| Nervous system (Q00-07)            | 3.63              | <b>2 (1.97-2.03)</b> | 0.42               |                   | 0.32                | 0.52               |                   | 1.21              |                      |
| Eye, ear, face and neck (Q10-18)   | 0.00              |                      | 0.00               |                   | 0.01                | 0.00               |                   | 0.00              |                      |
| Circulatory system (Q20-28)        | 7.25              |                      | 3.29               |                   | 3.25                | 4.10               |                   | 6.04              |                      |
| Respiratory system (Q30-34)        | 0.00              |                      | 0.23               |                   | 0.24                | 0.32               |                   | 1.21              |                      |
| Cleft lip/ palate (Q35-37)         | 0.00              |                      | 0.00               |                   | 0.02                | 0.00               |                   | 0.00              |                      |
| Digestive system (Q38-45)          | 0.52              |                      | 0.57               |                   | 0.48                | 0.63               |                   | 0.40              |                      |
| Urinary system (Q60-64)            | 0.52              |                      | 0.18               |                   | 0.14                | 0.15               |                   | 0.67              |                      |
| Musculoskeletal system (Q65-79)    | 0.00              |                      | 0.60               |                   | 0.64                | 0.84               |                   | 0.67              |                      |
| Other and unspecified (Q80-89)     | 1.55              |                      | 0.46               |                   | 0.56                | 0.73               |                   | 1.61              |                      |
| Chromosomal abnormalities (Q90-99) | 0.00              |                      | 0.48               |                   | 0.50                | 1.27               |                   | 3.63              | <b>2 (1.97-2.03)</b> |
| Total                              | 13.47             |                      | 6.22               |                   | 6.16                | 8.56               |                   | 15.44             |                      |

ICD, International classification of diseases, 10th revision; IMR, Infant mortality rate; OR, odd ratio; CI, confidence interval. IMRs by birth defects in group III were used as a reference for comparison with IMRs of other groups. Statistically significant values were presented.

1  
2  
3  
4  
5  
6  
7  
8  
9  
10  
11  
12  
13  
14  
15  
16  
17  
18  
19  
20  
21  
22  
23  
24  
25  
26  
27  
28  
29  
30  
31  
32  
33  
34  
35  
36  
37  
38  
39  
40  
41  
42  
43  
44  
45  
46  
47  
48  
49

Table 6. Comparison of fetal mortality by birth defect according to maternal age group

| Maternal age group                  | FMR               |                           |                 |                   |                     |                   |                 |                       |                   |                           |
|-------------------------------------|-------------------|---------------------------|-----------------|-------------------|---------------------|-------------------|-----------------|-----------------------|-------------------|---------------------------|
|                                     | I<br>(10-19<br>y) | OR<br>(95% CI)            | II<br>(20-29 y) | OR<br>(95%<br>CI) | III<br>(30-34<br>y) | OR<br>(95%<br>CI) | IV<br>(35-39 y) | OR<br>(95% CI)        | V<br>(40-50<br>y) | OR<br>(95% CI)            |
| Nervous system (Q00-07)             | 29.84             | <b>15.04 (3.59-62.96)</b> | 2.63            | ·                 | 1.97                | ·                 | 2.64            | ·                     | 5.97              | ·                         |
| Eye, ear, face and neck (Q10-18)    | 0.45              | ·                         | 0.03            | ·                 | 0.01                | ·                 | 0.02            | ·                     | 0.13              | ·                         |
| Circulatory system (Q20-28)         | 9.95              | <b>10 (1.23-78.20)</b>    | 1.48            | ·                 | 1.34                | ·                 | 1.83            | ·                     | 1.43              | ·                         |
| Respiratory system (Q30-34)         | 0.45              | ·                         | 0.12            | ·                 | 0.06                | ·                 | 0.09            | ·                     | 0.00              | ·                         |
| Cleft lip/ palate (Q35-37)          | 0.00              | ·                         | 0.27            | ·                 | 0.18                | ·                 | 0.17            | ·                     | 0.13              | ·                         |
| Digestive system (Q38-45)           | 1.36              | ·                         | 0.12            | ·                 | 0.06                | ·                 | 0.13            | ·                     | 0.13              | ·                         |
| Genital organs (Q50-56)             | 0.51              | ·                         | 0.01            | ·                 | 0.02                | ·                 | 0.02            | ·                     | 0.00              | ·                         |
| Urinary system (Q60-64)             | 0.00              | ·                         | 0.52            | ·                 | 0.49                | ·                 | 0.31            | ·                     | 1.17              | ·                         |
| Musculoskeletal system (Q65-79)     | 0.90              | ·                         | 0.64            | ·                 | 0.49                | ·                 | 0.50            | ·                     | 0.26              | ·                         |
| Other and unspecified (Q80-89)      | 24.87             | <b>8.35 (2.52-27.67)</b>  | 3.40            | ·                 | 2.66                | ·                 | 4.13            | ·                     | 7.92              | ·                         |
| Chromosomal abnormalities (Q90-99)  | 4.07              | ·                         | 1.87            | ·                 | 3.39                | ·                 | 10.11           | ·                     | 20.64             | <b>7.01 (2.09-23.52)</b>  |
| Chromosomal abnormalities (Q90-99)* | 4.07              | ·                         | 1.87            | ·                 | 3.39                | ·                 | 10.11           | <b>5 (1.10-22.84)</b> | 20.64             | <b>10.52 (2.47-44.88)</b> |
| Total                               | 71.89             | <b>6.59 (3.49-12.43)</b>  | 11.07           | ·                 | 10.68               | ·                 | 19.95           | ·                     | 37.78             | <b>3.46 (1.77-6.78)</b>   |

ICD, International classification of diseases, 10th revision; FMR, fetal mortality rate; OR, odd ratio; CI, confidence interval. FMRs by birth defects in group III were used as a reference for comparison with FMRs of other groups. \*Comparison was performed between group II (reference) and the other groups. Statistically significant values were presented.

For peer review only

1  
2  
3  
4  
5  
6  
7  
8  
9  
10  
11  
12  
13  
14  
15  
16  
17  
18  
19  
20  
21  
22  
23  
24  
25  
26  
27  
28  
29  
30  
31  
32  
33  
34  
35  
36  
37  
38  
39  
40  
41  
42  
43  
44  
45  
46  
47  
48  
49



Table 3. Korean prevalence of fetal deaths and infant deaths caused by birth defect subtypes in 2009-2015

|                                                          | N. of infant deaths<br>caused by<br>birth defect | Proportion<br>(%) in<br>birth<br>defects | Prevalence<br>per 10000<br>livebirths | N. of fetal<br>deaths<br>caused by<br>birth defect | Proportion<br>(%) in<br>birth<br>defects | Prevalence<br>per 10000<br>total births |
|----------------------------------------------------------|--------------------------------------------------|------------------------------------------|---------------------------------------|----------------------------------------------------|------------------------------------------|-----------------------------------------|
| <b>Birth defects (ICD-10)</b>                            |                                                  |                                          |                                       |                                                    |                                          |                                         |
| <b>Nervous system (Q00-07)</b>                           |                                                  |                                          |                                       |                                                    |                                          |                                         |
| Anencephaly (Q00.0-00.2)                                 | 37                                               | 1.70                                     | 0.12                                  | 213                                                | 4.90                                     | 0.66                                    |
| Encephalocele (Q01.0-01.9)                               | 3                                                | 0.14                                     | 0.01                                  | 32                                                 | 0.74                                     | 0.10                                    |
| Congenital Hydrocephalus (Q03.0-03.9)                    | 34                                               | 1.56                                     | 0.11                                  | 157                                                | 3.62                                     | 0.49                                    |
| Holoprosencephaly (Q04.0-04.2)                           | 14                                               | 0.64                                     | 0.04                                  | 46                                                 | 1.06                                     | 0.14                                    |
| Other brain anomaly (Q43-49)                             | 36                                               | 1.65                                     | 0.11                                  | 131                                                | 3.02                                     | 0.41                                    |
| Spina bifida (Q05.0-05.9)                                | 8                                                | 0.37                                     | 0.03                                  | 28                                                 | 0.64                                     | 0.09                                    |
| Other spinal anomaly (Q68-69)                            | 0                                                | 0.00                                     | 0.00                                  | 3                                                  | 0.07                                     | 0.01                                    |
| Arnold-Chiari malformation (Q70)                         | 1                                                | 0.05                                     | 0.00                                  | 18                                                 | 0.41                                     | 0.06                                    |
| Other nervous system anomaly (Q78-79)                    | 3                                                | 0.14                                     | 0.01                                  | 206                                                | 4.74                                     | 0.64                                    |
| <b>Eye, ear, face and neck (Q10-18)</b>                  | 1                                                | 0.05                                     | 0.00                                  | 7                                                  | 0.16                                     | 0.02                                    |
| <b>Circulatory system (Q20-28)</b>                       |                                                  |                                          |                                       |                                                    |                                          |                                         |
| Truncus arteriosus (Q20.0)                               | 9                                                | 0.41                                     | 0.03                                  | 1                                                  | 0.02                                     | 0.00                                    |
| Double outlet right ventricle                            | 66                                               | 3.03                                     | 0.21                                  | 7                                                  | 0.16                                     | 0.02                                    |
| Transposition of great arteries (Q20.1-20.3)             | 72                                               | 3.31                                     | 0.23                                  | 0                                                  | 0.00                                     | 0.00                                    |
| Double inlet ventricle (Q20.4)                           | 58                                               | 2.67                                     | 0.18                                  | 1                                                  | 0.02                                     | 0.00                                    |
| Discordant atrioventricular connection (Q20.5)           | 2                                                | 0.09                                     | 0.01                                  | 1                                                  | 0.02                                     | 0.00                                    |
| Isomerism of atrial appendages (Q20.6)                   | 3                                                | 0.14                                     | 0.01                                  | 1                                                  | 0.02                                     | 0.00                                    |
| Ventricular septal defect (Q21.0)                        | 50                                               | 2.30                                     | 0.16                                  | 20                                                 | 0.46                                     | 0.06                                    |
| Atrial septal defect (Q21.1)                             | 20                                               | 0.92                                     | 0.06                                  | 2                                                  | 0.05                                     | 0.01                                    |
| Atrioventricular septal defect (Q21.2)                   | 72                                               | 3.31                                     | 0.23                                  | 4                                                  | 0.09                                     | 0.01                                    |
| Tetralogy of Fallot (Q21.3)                              | 88                                               | 4.04                                     | 0.28                                  | 21                                                 | 0.48                                     | 0.07                                    |
| Other malformations of cardiac septa (Q21.4, 21.8, 21.9) | 6                                                | 0.28                                     | 0.02                                  | 10                                                 | 0.23                                     | 0.03                                    |
| Pulmonary valve atresia/stenosis (Q22.0-22.1)            | 52                                               | 2.39                                     | 0.16                                  | 1                                                  | 0.02                                     | 0.00                                    |
| Congenital tricuspid stenosis (Q22.4)                    | 5                                                | 0.23                                     | 0.02                                  | 1                                                  | 0.02                                     | 0.00                                    |
| Ebstein's anomaly (Q22.5)                                | 23                                               | 1.06                                     | 0.07                                  | 7                                                  | 0.16                                     | 0.02                                    |
| Hypoplastic right heart syndrome (Q22.6)                 | 1                                                | 0.05                                     | 0.00                                  | 1                                                  | 0.02                                     | 0.00                                    |
| Other malformations of tricuspid valve (Q22.8, 22.9)     | 3                                                | 0.14                                     | 0.01                                  | 4                                                  | 0.09                                     | 0.01                                    |
| Aortic valve stenosis/insufficiency (Q23.0, 23.1)        | 9                                                | 0.41                                     | 0.03                                  | 3                                                  | 0.07                                     | 0.01                                    |
| Mitral valve stenosis/insufficiency (Q23.2, 23.3)        | 8                                                | 0.37                                     | 0.03                                  | 0                                                  | 0.00                                     | 0.00                                    |

|    |                                                                                                        |    |      |      |     |      |      |
|----|--------------------------------------------------------------------------------------------------------|----|------|------|-----|------|------|
| 1  |                                                                                                        |    |      |      |     |      |      |
| 2  |                                                                                                        |    |      |      |     |      |      |
| 3  |                                                                                                        |    |      |      |     |      |      |
| 4  | Hypoplastic left heart syndrome (Q23.4)                                                                | 86 | 3.95 | 0.27 | 7   | 0.16 | 0.02 |
| 5  | Dextrocardia (Q 24.0)                                                                                  | 0  | 0.00 | 0.00 | 3   | 0.07 | 0.01 |
| 6  | Cor triatrium (Q 24.2)                                                                                 | 2  | 0.09 | 0.01 | 0   | 0.00 | 0.00 |
| 7  | Subaortic stenosis (Q 24.4)                                                                            | 2  | 0.09 | 0.01 | 0   | 0.00 | 0.00 |
| 8  | Malformation of coronary vessels (Q24.5-24.6)                                                          | 6  | 0.28 | 0.02 | 0   | 0.00 | 0.00 |
| 9  |                                                                                                        |    |      |      |     |      |      |
| 10 | Other heart malformation (Q24.2, 24.4-24.6)                                                            | 88 | 4.04 | 0.28 | 50  | 1.15 | 0.16 |
| 11 | Unspecified heart malformation (Q24.9)                                                                 | 75 | 3.45 | 0.24 | 299 | 6.88 | 0.93 |
| 12 | Patent ductus arteriosus (Q25.0)*                                                                      | 87 | 4.00 | 0.27 | 0   | 0.00 | 0.00 |
| 13 | Coarctation/atresia/stenosis of aorta (Q25.1-25.3)                                                     | 55 | 2.53 | 0.17 | 0   | 0.00 | 0.00 |
| 14 | Other malformations of aorta (Q25.4)                                                                   | 18 | 0.83 | 0.06 | 4   | 0.09 | 0.01 |
| 15 | Pulmonary artery atresia/stenosis (Q25.5, 25.6)                                                        | 22 | 1.01 | 0.07 | 2   | 0.05 | 0.01 |
| 16 | Total anomalous pulmonary venous connection (Q26.2)                                                    | 83 | 3.81 | 0.26 | 0   | 0.00 | 0.00 |
| 17 | Partial anomalous pulmonary venous connection (Q26.3)                                                  | 3  | 0.14 | 0.01 | 1   | 0.02 | 0.00 |
| 18 | Peripheral arteriovenous malformation (Q27.3, 27.9, 27.9)                                              | 1  | 0.05 | 0.00 | 4   | 0.09 | 0.01 |
| 19 | Malformations of cerebral vessels (Q 28.2, 28.3)                                                       | 6  | 0.28 | 0.02 | 4   | 0.09 | 0.01 |
| 20 | Other malformations of circulatory system (Q20.8, 20.9, 22.3, 25.7-26.1, 26.4, 27.0, 26.8, 28.8, 28.9) | 31 | 1.42 | 0.10 | 34  | 0.78 | 0.11 |
| 21 |                                                                                                        |    |      |      |     |      |      |
| 22 | <b>Respiratory system (Q30-34)</b>                                                                     |    |      |      |     |      |      |
| 23 | Other malformations of larynx, bronchus, trachea (Q31.0-32.4)                                          | 34 | 1.56 | 0.11 | 3   | 0.07 | 0.01 |
| 24 | Congenital cystic lung (Q33.0)                                                                         | 5  | 0.23 | 0.02 | 5   | 0.12 | 0.02 |
| 25 | Other malformation of lung (Q33.1-33.9)                                                                | 42 | 1.93 | 0.13 | 16  | 0.37 | 0.05 |
| 26 | Other malformations of respiratory system (Q34)                                                        | 6  | 0.28 | 0.02 | 4   | 0.09 | 0.01 |
| 27 | <b>Cleft lip/palate (Q35-37)</b>                                                                       | 3  | 0.14 | 0.01 | 64  | 1.47 | 0.20 |
| 28 |                                                                                                        |    |      |      |     |      |      |
| 29 | <b>Digestive system (Q38-45)</b>                                                                       |    |      |      |     |      |      |
| 30 | Other malformation of mouths (Q38.5)                                                                   | 0  | 0.00 | 0.00 | 1   | 0.02 | 0.00 |
| 31 | Esophageal atresia/stenosis (Q39.0-39.2)                                                               | 34 | 1.56 | 0.11 | 6   | 0.14 | 0.02 |
| 32 | Malformation of upper elementary tract (Q40.0-40.9)                                                    | 3  | 0.14 | 0.01 | 3   | 0.07 | 0.01 |
| 33 | Duodenal atresia/stenosis (Q41.0)                                                                      | 3  | 0.14 | 0.01 | 7   | 0.16 | 0.02 |
| 34 | Small intestine atresia/stenosis (Q41.1-41.9)                                                          | 22 | 1.01 | 0.07 | 1   | 0.02 | 0.00 |
| 35 | Anorectal atresia/stenosis (Q42.0-42.3)                                                                | 2  | 0.09 | 0.01 | 2   | 0.05 | 0.01 |
| 36 | Congenital megacolon (Q43.1)                                                                           | 44 | 2.02 | 0.14 | 0   | 0.00 | 0.00 |
| 37 | Malrotation of colon (Q43.3)                                                                           | 9  | 0.41 | 0.03 | 0   | 0.00 | 0.00 |
| 38 | Persistent cloaca (Q43.7)                                                                              | 1  | 0.05 | 0.00 | 2   | 0.05 | 0.01 |
| 39 | Other intestinal and bile duct malformation (Q43.8-44.3)                                               | 42 | 1.93 | 0.13 | 6   | 0.14 | 0.02 |
| 40 |                                                                                                        |    |      |      |     |      |      |
| 41 |                                                                                                        |    |      |      |     |      |      |
| 42 |                                                                                                        |    |      |      |     |      |      |
| 43 |                                                                                                        |    |      |      |     |      |      |
| 44 |                                                                                                        |    |      |      |     |      |      |
| 45 |                                                                                                        |    |      |      |     |      |      |
| 46 |                                                                                                        |    |      |      |     |      |      |
| 47 |                                                                                                        |    |      |      |     |      |      |
| 48 |                                                                                                        |    |      |      |     |      |      |
| 49 |                                                                                                        |    |      |      |     |      |      |
| 50 |                                                                                                        |    |      |      |     |      |      |
| 51 |                                                                                                        |    |      |      |     |      |      |
| 52 |                                                                                                        |    |      |      |     |      |      |
| 53 |                                                                                                        |    |      |      |     |      |      |
| 54 |                                                                                                        |    |      |      |     |      |      |
| 55 |                                                                                                        |    |      |      |     |      |      |
| 56 |                                                                                                        |    |      |      |     |      |      |
| 57 |                                                                                                        |    |      |      |     |      |      |
| 58 |                                                                                                        |    |      |      |     |      |      |
| 59 |                                                                                                        |    |      |      |     |      |      |
| 60 |                                                                                                        |    |      |      |     |      |      |

|    |                                            |    |      |      |    |           |
|----|--------------------------------------------|----|------|------|----|-----------|
| 1  |                                            |    |      |      |    |           |
| 2  |                                            |    |      |      |    |           |
| 3  |                                            |    |      |      |    |           |
| 4  | Liver malformation (Q44.7)                 | 4  | 0.18 | 0.01 | 0  | 0.00 0.00 |
| 5  | Other malformation of digestive system (Q  |    |      |      |    |           |
| 6  | 42.8, 43.0, 45.8, 45.9)                    | 5  | 0.23 | 0.02 | 6  | 0.14 0.02 |
| 7  | <b>Genital organs (Q50-56)</b>             | 0  | 0.00 | 0.00 | 5  | 0.12 0.02 |
| 8  |                                            |    |      |      |    |           |
| 9  | <b>Urinary system (Q60-64)</b>             |    |      |      |    |           |
| 10 | Renal agenesis (Q60.0-60.6)                | 22 | 1.01 | 0.07 | 44 | 1.01 0.14 |
| 11 | Autosomal recessive polycystic kidney      |    |      |      |    |           |
| 12 | (Q61.1)                                    | 10 | 0.46 | 0.03 | 6  | 0.14 0.02 |
| 13 | Unspecified polycystic kidney (Q61.3)      | 6  | 0.28 | 0.02 | 23 | 0.53 0.07 |
| 14 | Renal dysplasia (Q61.4)                    | 6  | 0.28 | 0.02 | 30 | 0.69 0.09 |
| 15 | Cystic kidney (Q61.0, Q61.5-61.9)          | 1  | 0.05 | 0.00 | 3  | 0.07 0.01 |
| 16 | Congenital hydronephrosis (Q62.0-62.8)     | 2  | 0.09 | 0.01 | 14 | 0.32 0.04 |
| 17 | Other renal anomaly (Q63.0, 63.2, 63.8,    |    |      |      |    |           |
| 18 | 63.9)                                      | 3  | 0.14 | 0.01 | 30 | 0.69 0.09 |
| 19 | Posterior urethral valve (Q64.2)           | 3  | 0.14 | 0.01 | 3  | 0.07 0.01 |
| 20 | Congenital absence of bladder and urethra  |    |      |      |    |           |
| 21 | (Q64.5-64.9)                               | 1  | 0.05 | 0.00 | 6  | 0.14 0.02 |
| 22 |                                            |    |      |      |    |           |
| 23 | <b>Musculoskeletal system (Q65-79)</b>     |    |      |      |    |           |
| 24 |                                            |    |      |      |    |           |
| 25 | Club foot-talipes equinovarus (66.0)       | 0  | 0.00 | 0.00 | 1  | 0.02 0.00 |
| 26 | Other congenital feet deformities (Q66.1-  |    |      |      |    |           |
| 27 | 66.9)                                      | 0  | 0.00 | 0.00 | 4  | 0.09 0.01 |
| 28 | Congenital deformities of skull, face, and |    |      |      |    |           |
| 29 | jaw (Q67.0-67.4)                           | 0  | 0.00 | 0.00 | 2  | 0.05 0.01 |
| 30 | Pectus carinatum (Q67.6)                   | 2  | 0.09 | 0.01 | 0  | 0.00 0.00 |
| 31 | Other congenital musculoskeletal           |    |      |      |    |           |
| 32 | deformities (Q68.0-Q70.9)                  | 0  | 0.00 | 0.00 | 12 | 0.28 0.04 |
| 33 | Total limb reduction defects (Q71.0-71.9,  |    |      |      |    |           |
| 34 | Q72.0-72.9, Q73.0-73.8)                    | 0  | 0.00 | 0.00 | 8  | 0.18 0.02 |
| 35 | Other malformation of limbs and pelvic     |    |      |      |    |           |
| 36 | girdle (Q74.0-Q74.2, 74.8)                 | 3  | 0.14 | 0.01 | 19 | 0.44 0.06 |
| 37 | Arthrogryposis multiplex congenita (Q74.3) | 4  | 0.18 | 0.01 | 1  | 0.02 0.00 |
| 38 | Craniosynostosis (Q75.0)                   | 6  | 0.28 | 0.02 | 0  | 0.00 0.00 |
| 39 | Malformations of skull and face bones      |    |      |      |    |           |
| 40 | (Q75.1-75.9)                               | 6  | 0.28 | 0.02 | 7  | 0.16 0.02 |
| 41 | Klippel-Feil syndrome (Q76.1)              | 2  | 0.09 | 0.01 | 0  | 0.00 0.00 |
| 42 | Malformations of spine and bony thorax     |    |      |      |    |           |
| 43 | (Q76.2-76.9)                               | 2  | 0.09 | 0.01 | 7  | 0.16 0.02 |
| 44 | Achondrogenesis/Hypochondrogenesis         |    |      |      |    |           |
| 45 | (Q77.0)                                    | 2  | 0.09 | 0.01 | 1  | 0.02 0.00 |
| 46 | Thanatophoric dysplasia (Q77.1)            | 7  | 0.32 | 0.02 | 20 | 0.46 0.06 |
| 47 | Asphyxiating thoracic dysplasia (Q77.2)    | 1  | 0.05 | 0.00 | 3  | 0.07 0.01 |
| 48 | Achondroplasia/hypochondroplasia (Q77.4)   | 3  | 0.14 | 0.01 | 9  | 0.21 0.03 |
| 49 | Osteogenesis imperfecta (Q78.0)            | 2  | 0.09 | 0.01 | 6  | 0.14 0.02 |
| 50 | Other osteochondrodysplasia (Q77.8, 78.8,  |    |      |      |    |           |
| 51 | 78.9)                                      | 2  | 0.09 | 0.01 | 4  | 0.09 0.01 |
| 52 |                                            |    |      |      |    |           |
| 53 |                                            |    |      |      |    |           |
| 54 |                                            |    |      |      |    |           |
| 55 |                                            |    |      |      |    |           |
| 56 |                                            |    |      |      |    |           |
| 57 |                                            |    |      |      |    |           |
| 58 |                                            |    |      |      |    |           |
| 59 |                                            |    |      |      |    |           |
| 60 |                                            |    |      |      |    |           |

|                                             |     |       |      |      |       |      |
|---------------------------------------------|-----|-------|------|------|-------|------|
| Diaphragmatic hernia (Q79.0)                | 138 | 6.34  | 0.43 | 22   | 0.51  | 0.07 |
| Other malformations of diaphragm (Q79.1)    | 6   | 0.28  | 0.02 | 1    | 0.02  | 0.00 |
| Omphalocele (Q79.2)                         | 10  | 0.46  | 0.03 | 15   | 0.35  | 0.05 |
| Gastroschisis (Q79.3)                       | 8   | 0.37  | 0.03 | 12   | 0.28  | 0.04 |
| Prune belly syndrome (Q79.4)                | 0   | 0.00  | 0.00 | 3    | 0.07  | 0.01 |
| Other musculoskeletal anomaly (Q79.8, 79.9) | 4   | 0.18  | 0.01 | 19   | 0.44  | 0.06 |
| <b>Other and unspecified (Q80-89)</b>       | 186 | 8.55  | 0.58 | 1105 | 25.44 | 3.43 |
| <b>Chromosomal abnormalities (Q90-99)</b>   | 220 | 10.11 | 0.69 | 1438 | 33.11 | 4.46 |

\*Patent ductus arteriosus cases included 81 cases whose birthweight was less than 2,500 g.

N, number.

Figure 1. Infant mortality caused by birth defects, according to maternal age group.

Maternal age groups: '10-19 yr' (I), '20-29 yr' (II), '30-34 yr' (III), '35-39 yr' (IV), and '40-55 yr' (V).

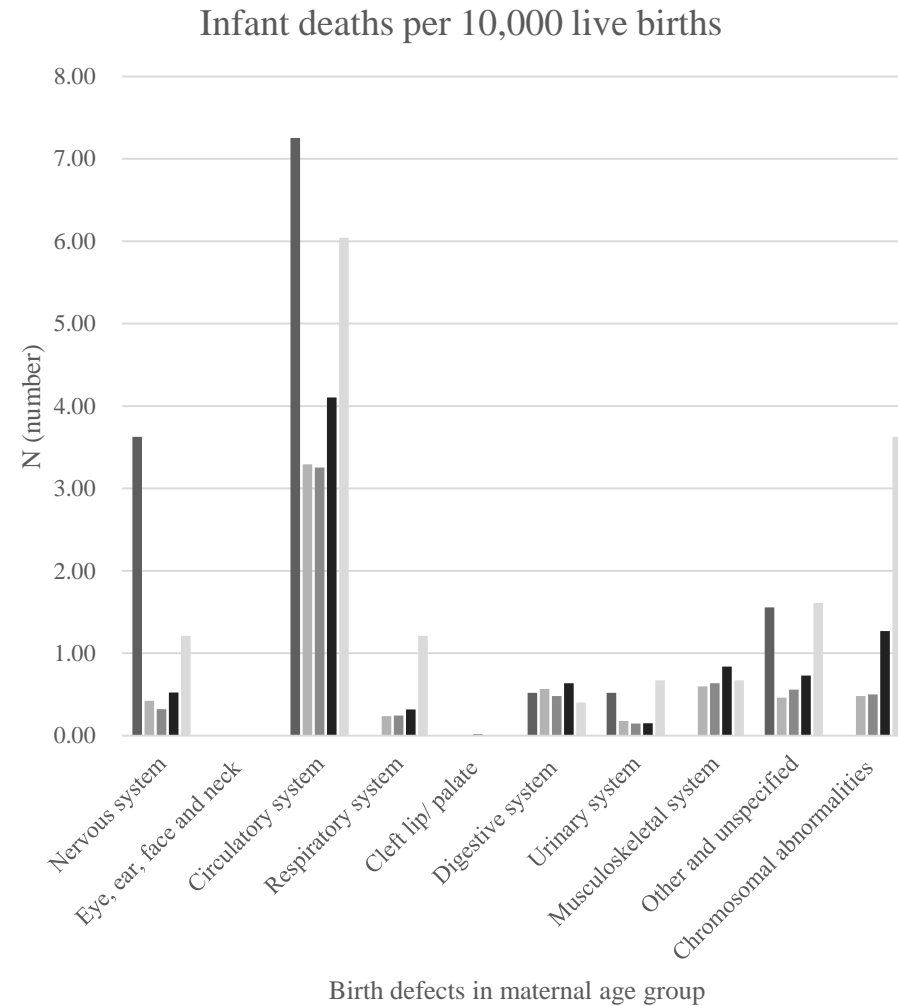

Figure 2. Fetal mortality caused by birth defects, according to maternal age group.

Maternal age groups: '10-19 yr' (I), '20-29 yr' (II), '30-34 yr' (III), '35-39 yr' (IV), and '40-55 yr' (V).

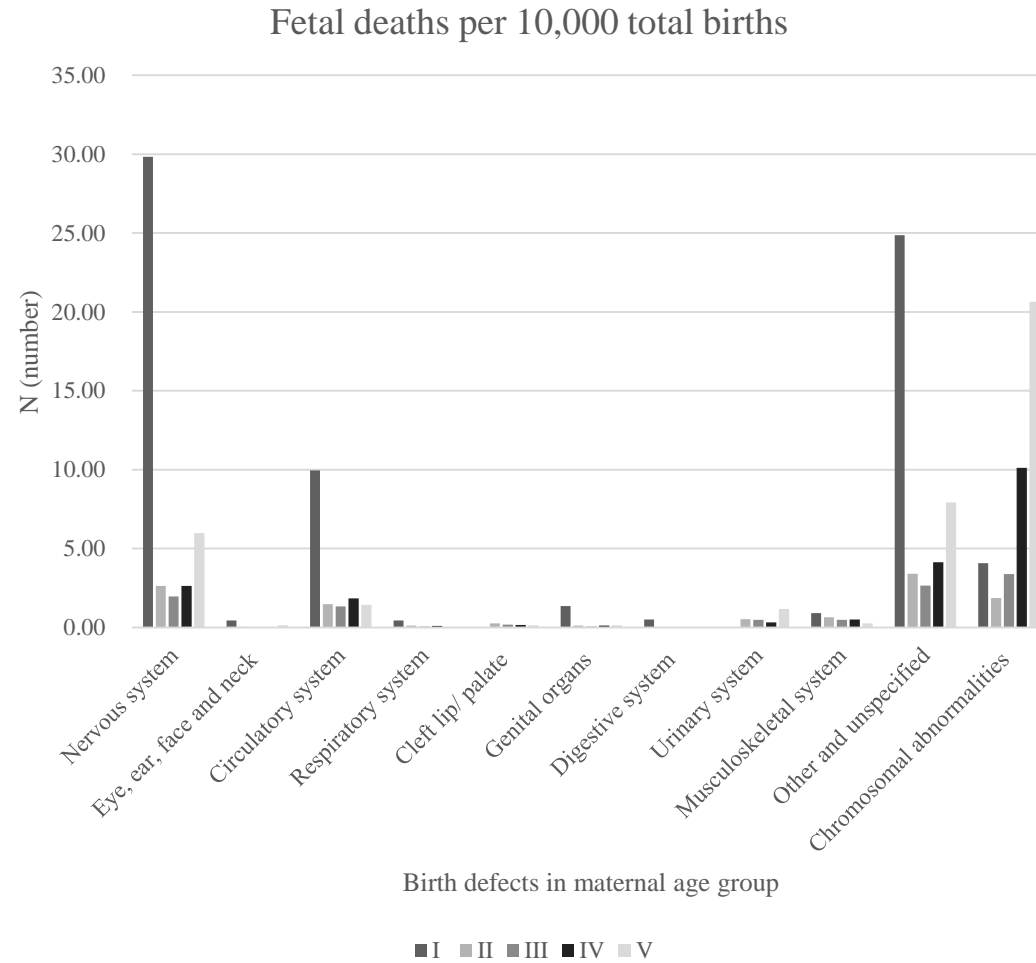

## STROBE Statement—checklist of items that should be included in reports of observational studies

|                              | Item No | Recommendation                                                                                                                                                                                                                                                                                                                                                                                                                                                                                                                                                                                                                                                                                                                                                             |
|------------------------------|---------|----------------------------------------------------------------------------------------------------------------------------------------------------------------------------------------------------------------------------------------------------------------------------------------------------------------------------------------------------------------------------------------------------------------------------------------------------------------------------------------------------------------------------------------------------------------------------------------------------------------------------------------------------------------------------------------------------------------------------------------------------------------------------|
| <b>Title and abstract</b>    | 1       | (a) Infant and fetal mortality caused by birth defects in Korea: retrospective national cohort study<br>(b) abstract: Page 2                                                                                                                                                                                                                                                                                                                                                                                                                                                                                                                                                                                                                                               |
| <b>Introduction</b>          |         |                                                                                                                                                                                                                                                                                                                                                                                                                                                                                                                                                                                                                                                                                                                                                                            |
| Background/rationale         | 2       | Page 3-4                                                                                                                                                                                                                                                                                                                                                                                                                                                                                                                                                                                                                                                                                                                                                                   |
| Objectives                   | 3       | Page 4                                                                                                                                                                                                                                                                                                                                                                                                                                                                                                                                                                                                                                                                                                                                                                     |
| <b>Methods</b>               |         |                                                                                                                                                                                                                                                                                                                                                                                                                                                                                                                                                                                                                                                                                                                                                                            |
| Study design                 | 4       | Retrospective national cohort study                                                                                                                                                                                                                                                                                                                                                                                                                                                                                                                                                                                                                                                                                                                                        |
| Setting                      | 5       | Database in Korean vital Statistics, between 2009 and 2015.                                                                                                                                                                                                                                                                                                                                                                                                                                                                                                                                                                                                                                                                                                                |
| Participants                 | 6       | (a) <i>Cohort study</i> —<br>2,176 infant deaths and 4,343 fetal deaths caused by birth defects, among 3,181,145 total live births and 43,385 fetal deaths between 2009 and 2015 in Korean vital statistics.<br><br>Page 4-5                                                                                                                                                                                                                                                                                                                                                                                                                                                                                                                                               |
| Variables                    | 7       | This study calculated infant mortality rate (IMR) by birth defects by dividing the number of infant deaths related to birth defects by the total number of live births. It was presented as the number per 10,000 live births as a standard. Fetal mortality rate (FMR) by birth defects was calculated by dividing the number of fetal deaths related with birth defect by the total number of live births and fetal deaths, which presented as the number per 10,000 total births. Maternal age groups were divided to the following five groups: '10-19 yr' (I), '20-29 yr' (II), '30-34 yr' (III), '35-39 yr' (IV), and '40-55 yr' (V). IMRs and FMRs by birth defects in group III were used as control for comparison with IMRs/FMRs of other groups.:<br><br>Page 5 |
| Data sources/<br>measurement | 8*      | Maternal age groups were divided to the following five groups: '10-19 yr' (I), '20-29 yr' (II), '30-34 yr' (III), '35-39 yr' (IV), and '40-55 yr' (V). IMRs and FMRs by birth defects in group III were used as control for comparison with IMRs/FMRs of other groups.<br><br>Page 5                                                                                                                                                                                                                                                                                                                                                                                                                                                                                       |
| Bias                         | 9       | The limitation of this study is that it does not show present prevalence of birth defects in live births. Therefore, it is necessary to establish a comprehensive surveillance system with periodic production of data and monitoring to have effective prevention and management of birth defects. The second limitation of this study is that death cause of death registry is mostly made by clinician without autopsy. Because one or two disease codes are registered as the main code in death registry, multiple anomalies might have been included in one category. Lastly, this study did not include data on maternal nationality, paternal age, educational background, antenatal care, or parents' occupation due to high rates of missing values. Page 11     |

|    |                        |                                                                                          |
|----|------------------------|------------------------------------------------------------------------------------------|
| 1  |                        |                                                                                          |
| 2  | Study size             | 10                                                                                       |
| 3  |                        | 2,176 infant deaths and 4,343 fetal deaths caused by birth defects, among 3,181,145      |
| 4  |                        | total live births and 43,385 fetal deaths between 2009 and 2015 in Korean vital          |
| 5  |                        | statistics.                                                                              |
| 6  | Quantitative variables | 11                                                                                       |
| 7  |                        | Explain how quantitative variables were handled in the analyses. If applicable,          |
| 8  |                        | describe which groupings were chosen and why                                             |
| 9  |                        | Maternal age groups were divided to the following five groups: '10-19 yr' (I), '20-29    |
| 10 |                        | yr' (II), '30-34 yr' (III), '35-39 yr' (IV), and '40-55 yr' (V). IMRs and FMRs by birth  |
| 11 |                        | defects in group III were used as control for comparison with IMRs/FMRs of other         |
| 12 |                        | groups, because IMRs and FMRs were lowest in group III.                                  |
| 13 |                        | Page 5                                                                                   |
| 14 | Statistical methods    | 12                                                                                       |
| 15 |                        | (a) Statistical calculations were performed using SPSS version 24.0 (SPSS Inc.,          |
| 16 |                        | Chicago, IL, USA), including means, proportions, odd ratio (OR), and 95%                 |
| 17 |                        | confidence intervals (CIs). Chi-square tests were performed to compare proportions of    |
| 18 |                        | independent variables and t-tests were performed to compare means. Statistical           |
| 19 |                        | significance was considered at $P < 0.05$ or if the 95% CI of OR did not include 1.      |
| 20 |                        | (b) In the analysis according to maternal age group, 2,529 live births, 113 fetal deaths |
| 21 |                        | not related to birth defects, and 12 fetal deaths related to birth defects were excluded |
| 22 |                        | due to missing values of maternal age.                                                   |
| 23 |                        |                                                                                          |
| 24 |                        |                                                                                          |
| 25 |                        |                                                                                          |
| 26 |                        |                                                                                          |

27  
28 Continued on next page  
29  
30  
31  
32  
33  
34  
35  
36  
37  
38  
39  
40  
41  
42  
43  
44  
45  
46  
47  
48  
49  
50  
51  
52  
53  
54  
55  
56  
57  
58  
59  
60



**Results**

|                   |     |                                                                                                                                                                                                                                                                                                                                                                                                                                                                                                                                                                                                                                                                                                                                                                |
|-------------------|-----|----------------------------------------------------------------------------------------------------------------------------------------------------------------------------------------------------------------------------------------------------------------------------------------------------------------------------------------------------------------------------------------------------------------------------------------------------------------------------------------------------------------------------------------------------------------------------------------------------------------------------------------------------------------------------------------------------------------------------------------------------------------|
| Participants      | 13* | 2,176 infant deaths and 4,343 fetal deaths caused by birth defects, among 3,181,145 total live births and 43,385 fetal deaths between 2009 and 2015 in Korean vital statistics.                                                                                                                                                                                                                                                                                                                                                                                                                                                                                                                                                                                |
| Descriptive data  |     | Total numbers of live births and fetal deaths in Korea from 2009 to 2015 were 3,181,145 and 43,385, respectively. Among 9,563 infant deaths during the 7 years, the number of infant deaths related to birth defect was 2,176, accounting for 22.8% of all infant deaths. The number of fetal deaths related to birth defects was 4,343, accounting for 10.0% of all fetal deaths. Baseline demographic characteristics are summarized in Table 1. (page 6)                                                                                                                                                                                                                                                                                                    |
| Outcome data      | 15* | IMRs and FMRs by birth defects and comparison according to maternal age group.                                                                                                                                                                                                                                                                                                                                                                                                                                                                                                                                                                                                                                                                                 |
| Main results      | 16  | IMRs and FMRs by birth defects were 6.84 per 10,000 live births, and 13.47 per 10,000 total births. The most common causes of infant deaths and fetal deaths by birth defect were anomaly of circulatory system (51.1%, IMR 3.5) and chromosomal abnormality (33.1%, FMR 4.46), respectively. Among groups by maternal age, FMRs by birth defects were significantly higher in group I and V, compared to it in group III, (Odd ratio (OR) 6.59, 95% CI 3.49-12.43 and 3.46, 95% CI 1.77-6.78, respectively). IMR and FMR by nervous system anomaly were significantly higher in group I, with 3.63 (OR 2.0, 95% CI 1.97-2.03) and 29.84 (OR15.04, 95% CI 3.59-62.96), compared to 0.32 and 1.97 in group III.                                                 |
| Other analyses    | 17  |                                                                                                                                                                                                                                                                                                                                                                                                                                                                                                                                                                                                                                                                                                                                                                |
| <b>Discussion</b> |     |                                                                                                                                                                                                                                                                                                                                                                                                                                                                                                                                                                                                                                                                                                                                                                |
| Key results       | 18  | FMRs by birth defects were the highest in extreme maternal age groups. Severe anomalies except chromosomal abnormality were the most prevalent in teenage pregnancies.                                                                                                                                                                                                                                                                                                                                                                                                                                                                                                                                                                                         |
| Limitations       | 19  | The limitation of this study is that it does not show present prevalence of birth defects in live births. Therefore, it is necessary to establish a comprehensive surveillance system with periodic production of data and monitoring to have effective prevention and management of birth defects. The second limitation of this study is that death cause of death registry is mostly made by clinician without autopsy. Because one or two disease codes are registered as the main code in death registry, multiple anomalies might have been included in one category. Lastly, this study did not include data on maternal nationality, paternal age, educational background, antenatal care, or parents' occupation due to high rates of missing values. |
| Interpretation    | 20  | However, this study is the first one that reports IMRs and FMRs caused by birth defects in Korea and different patterns according to maternal age group. Severe birth defects with high FMR were found to be more common in extreme maternal age groups (the youngest and the oldest). Except chromosomal abnormality, most severe anomalies, especially those of the nervous system and cardiovascular system, were more common in teenage pregnancies.                                                                                                                                                                                                                                                                                                       |
| Generalisability  | 21  | The most common birth defect group related to infant deaths was anomaly of the circulatory system. However, the most common birth defect subtype was CDH. Despite advances in prenatal diagnosis and neonatal intensive care including extracorporeal membrane oxygenation and inhaled nitric oxide use, mortality rates due to CDH remain high, ranging from 50% to                                                                                                                                                                                                                                                                                                                                                                                           |

1  
2 70% with great variability between centers [14-16]. The second most common birth defect in  
3 infant deaths related to birth defect was TOF. The 10-year survival rate of TOF has been  
4 reported to be approximately 95 % [17, 18]. When we consider the prevalence of TOF in live  
5 births in Korea with 4.1-4.2 per 10,000 live births [12, 13] and the IMR by TOF with 0.28 per  
6 10,000 live births in this study, we can speculate that nationwide infant survival rates of TOF  
7 in Korea will be approximately 93.3%, which is similar to that in the other reports [17, 18].  
8

---

#### 9 **Other information**

---

10  
11 Funding 22 This study was supported by Research Fund of Seoul St. Mary's Hospital, The Catholic  
12 University of Korea.  
13

14 \*Give information separately for cases and controls in case-control studies and, if applicable, for exposed and  
15 unexposed groups in cohort and cross-sectional studies.  
16

17  
18 **Note:** An Explanation and Elaboration article discusses each checklist item and gives methodological background and  
19 published examples of transparent reporting. The STROBE checklist is best used in conjunction with this article (freely  
20 available on the Web sites of PLoS Medicine at <http://www.plosmedicine.org/>, Annals of Internal Medicine at  
21 <http://www.annals.org/>, and Epidemiology at <http://www.epidem.com/>). Information on the STROBE Initiative is  
22 available at [www.strobe-statement.org](http://www.strobe-statement.org).  
23  
24  
25  
26  
27  
28  
29  
30  
31  
32  
33  
34  
35  
36  
37  
38  
39  
40  
41  
42  
43  
44  
45  
46  
47  
48  
49  
50  
51  
52  
53  
54  
55  
56  
57  
58  
59  
60

# BMJ Open

## A national cohort study evaluating infant and fetal mortality caused by birth defects in Korea

|                                 |                                                                                                                                                                                                                                                                                                                                                                                                                                                                                                                                                                                                                 |
|---------------------------------|-----------------------------------------------------------------------------------------------------------------------------------------------------------------------------------------------------------------------------------------------------------------------------------------------------------------------------------------------------------------------------------------------------------------------------------------------------------------------------------------------------------------------------------------------------------------------------------------------------------------|
| Journal:                        | <i>BMJ Open</i>                                                                                                                                                                                                                                                                                                                                                                                                                                                                                                                                                                                                 |
| Manuscript ID                   | bmjopen-2017-017963.R1                                                                                                                                                                                                                                                                                                                                                                                                                                                                                                                                                                                          |
| Article Type:                   | Research                                                                                                                                                                                                                                                                                                                                                                                                                                                                                                                                                                                                        |
| Date Submitted by the Author:   | 31-Aug-2017                                                                                                                                                                                                                                                                                                                                                                                                                                                                                                                                                                                                     |
| Complete List of Authors:       | Ko, Hyun Sun; Catholic University of Korea School of Medicine, Kim, Dong Joo; Catholic University of Korea, obstetrics and gynecology; St. Mary's women's hospital, Obstetrics and gynecology<br>Chung, Yoohyun; Catholic University of Korea School of Medicine<br>Wie, Jeong Ha; Catholic University of Korea School of Medicine<br>Choi, Sae Kyung; Catholic University of Korea School of Medicine<br>Park, In Yarg; Catholic University of Korea School of Medicine<br>Park, Yong Gyu; Catholic University of Korea School of Medicine<br>Shin, Jong Chul; Catholic University of Korea School of Medicine |
| <b>Primary Subject Heading</b>: | Epidemiology                                                                                                                                                                                                                                                                                                                                                                                                                                                                                                                                                                                                    |
| Secondary Subject Heading:      | Obstetrics and gynaecology, Health policy, Public health                                                                                                                                                                                                                                                                                                                                                                                                                                                                                                                                                        |
| Keywords:                       | birth defect, infant, fetal, mortality, maternal age                                                                                                                                                                                                                                                                                                                                                                                                                                                                                                                                                            |
|                                 |                                                                                                                                                                                                                                                                                                                                                                                                                                                                                                                                                                                                                 |

SCHOLARONE™  
Manuscripts

1  
2  
3  
4 1 **A national cohort study evaluating infant and fetal mortality caused by birth defects in Korea**

5  
6  
7 2 Hyun Sun Ko,<sup>1#</sup> Dong Joo Kim,<sup>2,3#</sup> Yoohyun Chung,<sup>1</sup> Jeong Ha Wie,<sup>1</sup> Sae Kyung Choi,<sup>1</sup> In Yang Park,<sup>1</sup> Yong-gyu Park,<sup>4</sup> Jong Chul

9  
10  
11 3 Shin<sup>1\*</sup>

12  
13  
14  
15 5 <sup>1</sup>Department of Obstetrics and Gynecology, College of Medicine, The Catholic University of Korea, Seoul, Republic of Korea,

16  
17 6 <sup>2</sup>Department of Obstetrics and Gynecology, Graduate school, The Catholic University of Korea, Seoul, Republic of Korea,

18  
19 7 <sup>3</sup>Department of Obstetrics and Gynecology, St. Mary's women's hospital, Suwon, Republic of Korea, <sup>4</sup>Department of Biostatistics,

20  
21  
22 8 College of Medicine, The Catholic University of Korea, Seoul, Republic of Korea

23  
24  
25 9

26  
27  
28 10 # Hyun Sun Ko and Dong Joo Kim equally contributed to this work.

29  
30  
31  
32 11 \*Corresponding Author: Jong Chul Shin

33  
34  
35 12 Department of Obstetrics and Gynecology, Seoul St. Mary's Hospital, College of Medicine, The Catholic University of Korea, 222,

36  
37 13 Banpo-daero, Seocho-gu, Seoul, 06591, Republic of Korea

38  
39  
40 14 Tel: +82-2-2258-6169, Fax: +82-2-595-1549, E-mail: jcshin@catholic.ac.kr

1  
2  
3 15 Key words; birth defect, infant death, fetal death, maternal age  
4  
5

6 16 **Running title: Infant and fetal mortality caused by birth defects in Korea**  
7

8  
9 17 Tweetable abstract: Severe anomalies except chromosomal abnormality were the most prevalent in teenage pregnancies.  
10

11 18 Abstract  
12

13  
14  
15 19 Objective: To analyze the prevalence of fetal and infant deaths due to birth defects in Korea and those trends according to maternal  
16  
17 20 age.  
18  
19

20 21 Design: Retrospective national cohort study  
21

22 22 Setting: Database in Korean vital Statistics, between 2009 and 2015.  
23

24 23 Participants: 2,176 infant deaths and 4,343 fetal deaths caused by birth defects, among 3,181,145 total live births and 43,385 fetal  
25  
26 24 deaths during study periods  
27  
28

29  
30  
31 25 Methods: Infant and fetal mortality rates (IMRs and FMRs) by birth defects, from deaths caused by birth defects, were analyzed.  
32

33  
34 26 Those were compared, according to maternal age groups; '10-19 yr' (I), '20-29 yr' (II), '30-34 yr' (III), '35-39 yr' (IV), and '40-55 yr'  
35  
36 27 (V).  
37  
38

39 28 Main Outcome Measures: IMRs and FMRs by birth defects and comparison according to maternal age group.  
40  
41

1  
2  
3 29 Results: IMRs and FMRs by birth defects were 6.84 per 10,000 live births, and 13.47 per 10,000 total births. The most common  
4  
5  
6 30 causes of infant deaths and fetal deaths by birth defect were anomaly of circulatory system (51.1%, IMR 3.5) and chromosomal  
7  
8 31 abnormality (33.1%, FMR 4.46), respectively. Among groups by maternal age, FMRs by birth defects were significantly higher in  
9  
10 32 group I and V, compared to it in group III, (Odd ratio (OR) 6.59, 95% CI 3.49-12.43 and 3.46, 95% CI 1.77-6.78, respectively). IMR  
11  
12 33 and FMR by nervous system anomaly were significantly higher in group I, with 3.63 (OR 2.0, 95% CI 1.97-2.03) and 29.84 (OR15.04,  
13  
14 34 95% CI 3.59-62.96), compared to 0.32 and 1.97 in group III.

15  
16  
17  
18 35 Conclusion: FMRs by birth defects were the highest in extreme maternal age groups. Severe anomalies except chromosomal  
19  
20 36 abnormality were the most prevalent in teenage pregnancies.  
21  
22  
23  
24 37

#### 25 26 27 38 Strengths and limitations of this study

- 28  
29 39 • This study is the first one that reports infant and fetal mortalities caused by birth defects in Korea, from the national vital  
30  
31 40 statistics.
- 32  
33 41 • This study compared the infant and fetal mortalities caused by birth defects, according to maternal age group, which showed  
34  
35 42 higher prevalence of them in teenage pregnancies.
- 36  
37 43 • The limitation of this study is that death cause of fetal/infant deaths were mostly diagnosed clinically without autopsy and  
38  
39 44 there is no available data about spontaneous or induced abortion in fetal deaths.  
40  
41  
42

- 1  
2  
3  
4 45 • The limitation of this study is that it does not show present prevalence of birth defects in live births.  
5  
6 46  
7  
8

9 47 **Introduction**

10  
11 48 Birth defects (structural abnormalities, sensory changes, chromosomal abnormalities, metabolic abnormalities, and  
12  
13  
14 49 neurodevelopmental defects) are presented in approximately 2-3% of all births [1-3]. Severe birth defects account for 20-25% of  
15  
16  
17 50 perinatal mortality and they are leading causes of infant mortality, abortion, and stillbirth [2-5]. During the last decade, screening tests  
18  
19 51 and ultrasonography during pregnancy have been developed to detect birth defects. However, etiologies of 60-70% of birth defects  
20  
21 52 remain unknown.  
22

23  
24 53 In developed countries, birth defects surveillance systems have been developed to collect data on  
25  
26  
27 54 major structural birth defects and chromosomal abnormalities [6-8]. European registry reported that total and live birth prevalence of  
28  
29  
30 55 trisomies 21, 18 and 13 were increased between 1990 and 2009, and those were mainly associated with increasing maternal age [9].  
31

32  
33 56 While the number of live births in Korea has been decreased, maternal age has been increased [10, 11]. The prevalence of birth  
34  
35 57 defects in Korean live births has been reported before, using the data based on the National Health Insurance Corporation on medical  
36  
37 58 institutes across the country [12, 13]. However, it is important to include stillbirths and abortions in addition to live births to account  
38  
39 59 for all pregnancies within birth defects. Although it is hard to include spontaneous abortion in the early stage of pregnancy, the  
40  
41  
42  
43  
44  
45

1  
2  
3 60 investigation of fetal death related with birth defect can be useful for estimating the prevalence of birth defects. In addition,  
4  
5 61 investigation of infant death related to birth defect can be valuable information for counseling parents, antenatally and postnatally.  
6  
7

8  
9 62 The aim of this study was to analyze the prevalence of fetal and infant deaths associated with birth defects, which are fetal/infant  
10  
11 63 mortality rates (FMR/IMR) by birth defect, and evaluate changes of those prevalence rates, according to maternal age.  
12  
13

#### 14 64 **Materials and Methods**

15  
16

17 65 This national cohort study was conducted by utilizing deidentified data about fetal deaths, infant deaths, and live births between 2009  
18  
19 66 and 2015 from 'Korean Vital Statistics' of the Korean Statistical Information Service [10]. Korean Vital Statistics is a nationwide  
20  
21 67 database developed to understand birth, death, marriage, and divorce in Korea. Data from Korean Vital Statistics are released monthly  
22  
23 68 and annually via a press release, on website (<http://kosis.kr>), and in online publications, such as 'Annual Report on Vital Statistics.'  
24  
25 69 Since 2007, surveys and statistical analysis methods for infant and maternal death have been revised and complemented [14] to  
26  
27 70 develop into a method for calculating more concrete, accurate numbers for fetal, infant, and maternal mortality rates in Korea. In  
28  
29 71 summary, revision and supplementation of the statistics for fetal, infant and maternal death have been performed and validated by  
30  
31 72 combination of official death registry data for vital statistics, survey data of public health center or medical institution, medical  
32  
33 73 insurance claims database of the National Health Insurance Corporation on medical institutes across the country, and cremation  
34  
35 74 reports data. Because national data about fetal death has been included since 2009, study cohort for this study was made by data  
36  
37 75 between 2009 and 2015. However, data did not include information whether the cause of death was proven by autopsy. From fetal  
38  
39  
40  
41  
42  
43  
44  
45



1  
2  
3 76 and infant deaths data, fetal and infant death recorded as ‘a death caused by birth defect’ were included in fetal and infant deaths  
4  
5 77 associated with birth defect. Fetal deaths recorded as ‘termination of pregnancy (TOP)’ were excluded. Fetal death was defined as  
6  
7  
8 78 intrauterine fetal death occurring after 16 weeks of gestational age and before the start of delivery or those occurring during labor.  
9  
10 79 Infant death was defined as a death occurring within the first year of life.  
11  
12  
13 80 Birth defects were categorized by birth defect group (the system affected) and subtype (individual disease) according to the 10th  
14  
15 81 Revision of the International Classification of Diseases (ICD-10) and were investigated by including major groups of birth defects  
16  
17 82 managed by EUROCAT, ICBDSR, and the National Birth Defects Prevention Network (NBDPN). Deaths caused by disease code ‘Q’  
18  
19 83 representing congenital disease were defined as fetal and infant deaths related to birth defect. According to the above standards, 2,176  
20  
21 84 infant deaths and 4,343 fetal deaths were caused by birth defect. This study calculated IMR by birth defects by dividing the number of  
22  
23 85 infant deaths related to birth defects by the total number of live births. It was presented as the number per 10,000 live births as a  
24  
25 86 standard. FMR by birth defects was calculated by dividing the number of fetal deaths related with birth defect by the total number of  
26  
27 87 live births and fetal deaths, which presented as the number per 10,000 total births. Maternal age groups were divided to the following  
28  
29 88 five groups: ‘10-19 yr’ (I), ‘20-29 yr’ (II), ‘30-34 yr’ (III), ‘35-39 yr’ (IV), and ‘40-55 yr’ (V). IMRs and FMRs by birth defects in  
30  
31 89 group III were used as control for comparison with IMRs/FMRs of other groups. For chromosomal abnormalities, comparison was  
32  
33 90 also performed between group II and the other groups.  
34  
35  
36  
37  
38  
39  
40  
41  
42  
43  
44  
45  
46  
47  
48  
49

1  
2  
3 92 **Statistical analysis**  
4  
5

6 93 Statistical calculations were performed using SPSS version 24.0 (SPSS Inc., Chicago, IL, USA), including means, proportions, odd  
7  
8 94 ratio (OR), and 95% confidence intervals (CIs). Chi-square tests were performed to compare proportions of independent variables and  
9  
10 95 t-tests were performed to compare means. One decimal place was marked up in the presentation of maternal ages and gestational ages.  
11  
12 96 Statistical significance was considered at  $P < 0.05$  or if the 95% CI of OR did not include 1.  
13  
14  
15

16 97 **Ethics statement**  
17  
18

19 98 The study protocol was approved by the institutional review board of Catholic University of Korea (KC17ZESI0409). Informed  
20  
21 99 consent was waived by the board.  
22  
23  
24

25 100  
26  
27

28 101  
29  
30

31 102  
32  
33

34 103  
35  
36

37 104 **Results**  
38  
39

40 105 **Baseline characteristics**  
41  
42  
43  
44  
45

1  
2  
3 106 Total numbers of live births and fetal deaths in Korea from 2009 to 2015 were 3,181,145 and 43,385, respectively. Among 9,563  
4  
5 107 infant deaths during the 7 years, the number of infant deaths related to birth defect was 2,176, accounting for 22.8% of all infant  
6  
7 108 deaths. 759 fetal deaths (1.75% of all fetal deaths) recorded as ‘TOP’ were excluded. The number of fetal deaths related to birth  
8  
9 109 defects was 4,343, accounting for 10.0% of all fetal deaths. Baseline demographic characteristics are summarized in Table 1.  
10  
11  
12  
13  
14 110

### 111 **IMRs, by birth defect groups and subtypes**

112 IMR by total birth defects was 6.84 per 10,000 live births (Table 2). Anomaly of the circulatory system was the most common cause  
113 of infant deaths related to birth defect, accounting for 51.1% of all infant deaths. Its IMR was 3.5 per 10,000 live births. The next most  
114 common defects in infant deaths were chromosomal anomalies (0.69 per 10,000 live births, 10.1%) and musculoskeletal system  
115 anomalies (0.65 per 10,000 live births, 9.6%). Among subtypes of birth defects, congenital diaphragmatic hernia (CDH) showed the  
116 highest IMR at 0.43 per 10,000 live births (supplementary material). Among specified anomalies, lethal birth defects with the next  
117 highest IMRs were Tetralogy of Fallot (TOF) and hypoplastic left heart syndrome (HLHS) (with IMRs of 0.28 and 0.27 per 10,000  
118 live births, respectively). Among chromosomal anomalies, Down syndrome was the most common chromosomal abnormality with  
119 IMR of 0.27 per 10,000 live births (Table 3).  
120

### 121 **FMRs by birth defect groups and subtypes**

122 FMR by total birth defects was 13.47 per 10,000 total births (live births plus stillbirths) (Table 2). The most common defects by group  
123 were chromosomal anomalies, accounting for 33.1% of fetal deaths related to birth defect, and its FMR was 4.46 per 10,000 total births.  
124 The most common birth defect subtype in fetal deaths was Down syndrome with FMR of 1.78 per 10,000 total births, and followed by  
125 other chromosomal abnormality, unspecified congenital heart malformation, and Edward syndrome, with FMR of 1.36, 0.93 and 0.82  
126 per 10,000 total births, respectively (Table 3 and supplementary material).

### 127 **IMRs and FMRs by birth defect groups, according to the maternal age group**

128 In the analysis according to maternal age group, 2,529 live births, 113 fetal deaths not related to birth defects, and 12 fetal deaths  
129 related to birth defects were excluded due to missing values of maternal age. In infant deaths related to birth defect, anomaly of the  
130 circulatory system was most common in all age groups (Table 4, Figure 1). IMRs of chromosomal abnormality seemed to be increased  
131 in groups IV and V compared to that in group III. However, statistically significant difference was only observed between group V  
132 and group III (OR 2.00 95% CI 1.97-2.03). The IMR of nervous system anomaly was significantly higher in the youngest maternal  
133 age group (group I, 10-19 yr) with 3.63 per 10,000 live births (OR 2.0, 95% CI 1.97-2.03), compared to that in group III (0.32 per  
134 10,000 live births). In fetal deaths related to birth defect, most FMRs by birth defects were highest in the youngest group, except for  
135 FMR by chromosomal abnormality which was significantly higher in group V compared to that in group III (OR 7.01, 95% CI, 2.09-  
136 23.52) (Table 5, Figure 2). Compared to FMR of group II, FMRs of chromosomal abnormality were significantly higher in group IV

1  
2  
3 137 and V (OR 5.00, 95% CI, 1.10-22.84 and OR 10.52, 95% CI 2.47-44.88, respectively). FMRs by total birth defects were significantly  
4  
5  
6 138 higher in group I and V, compared to that in group III, (OR 6.59, 95% CI 3.49-12.43 and OR 3.46, 95% CI 1.77-6.78, respectively).  
7  
8 139 Individually, FMRs for anomalies of nervous system and cardiovascular system, and, other and unspecified anomalies were  
9  
10 140 significantly higher in group I, compared to those in group III, (OR 15.04, 95% CI 3.59-62.96; OR 10, 95%CI 1.23-78.2, and OR 8.35,  
11  
12 141 95% CI 2.52-27.67, respectively)  
13  
14  
15  
16 142  
17  
18

## 19 143 **Discussion**

20  
21  
22 144 It is important to know severe birth defects which can lead fetal and infant deaths and its prevalence. Previously, the prevalence of  
23  
24 145 birth defects in Korea in live births in 2005 and 2006 was reported to be approximately 2.9% [12], similar to those (2-3%) of other  
25  
26 146 studies [1-3]. However, the other study reported the prevalence of birth defects in Korea in 2009 and 2010 as 5.8% [13]. Although  
27  
28 147 there might be methodological limitation and variations, the prenatal and postnatal detection rates of birth defects in live births seems  
29  
30 148 increasing. In this study, 22.8% of infant deaths of Korea were related to birth defects. IMR and FMR caused by birth defects between  
31  
32 149 2009 and 2015 were 6.84 per 10,000 live births and 13.47 per 10,000 total births, respectively.  
33  
34  
35

36 150 The most common birth defect group related to infant deaths was anomaly of the circulatory system. However, the most common birth  
37  
38 151 defect subtype was CDH. Despite advances in prenatal diagnosis and neonatal intensive care including extracorporeal membrane  
39  
40 152 oxygenation and inhaled nitric oxide use, mortality rates due to CDH remain high, ranging from 50% to 70% with great variability  
41  
42  
43  
44  
45

1  
2  
3 153 between centers [15-17]. The second most common birth defect in infant deaths related to birth defect was TOF. The 10-year survival  
4  
5 154 rate of TOF has been reported to be approximately 95 % [18, 19]. When we consider the prevalence of TOF in live births in Korea  
6  
7  
8 155 with 4.1-4.2 per 10,000 live births [12, 13] and the IMR by TOF with 0.28 per 10,000 live births in this study, we can speculate that  
9  
10 156 nationwide infant survival rates of TOF in Korea will be approximately 93.3%, which is similar to that in the other reports [18, 19].  
11

12  
13 157 As expected, when IMRs and FMRs caused by birth defects were compared according to maternal age group, IMRs and FMRs due  
14  
15 158 to chromosomal abnormality were higher in older maternal age groups (IV and V) compared to those in group II or III. FMRs due to  
16  
17 159 birth defects were significantly higher in groups I and V compared to those in group III (OR: 6.59, 95% CI: 3.49-12.43 and OR: 3.46,  
18  
19 160 95% CI: 1.77-6.78, respectively). FMR was much higher in group I. Especially, IMR and FMR due to anomalies of the nervous  
20  
21 161 system were significantly higher in group I compared with those in group III, indicating higher prevalence of severe anomalies of  
22  
23 162 nervous system in teenage pregnancies. In North America, fortification of flour and grain products became mandatory in 1998.  
24  
25 163 Following folic acid fortification, prevalence of spina bifida birth in Canada fell by over 50% and that of other neural tube defects  
26  
27 164 (NTDs) fell by approximately one-third [20]. In addition, the registry of 'European surveillance of congenital anomalies' has  
28  
29 165 concluded that mandatory folic acid fortification is needed because the prevalence of NTDs has not decreased in Europe despite  
30  
31 166 longstanding recommendations aiming at promoting periconceptional folic acid supplementation [21]. Results of Cochrane databases  
32  
33 167 systematic review also showed a protective effect of daily folic acid supplementation in preventing NTDs compared to no  
34  
35 168 intervention/placebo or vitamins and minerals without folic acid (risk ratio 0.31, 95% CI 0.17- 0.58); five studies; 6708 births; high  
36  
37  
38  
39  
40  
41  
42  
43  
44  
45

1  
2  
3 169 quality evidence) [22]. Teenage pregnancies are more likely unplanned and exposed to alcohol, drug, sexual abuse, and nutritional  
4  
5  
6 170 imbalance. When pregnancies are complicated by birth defects in young age, they might lead to TOP, more easily. This study  
7  
8 171 demonstrated increasing trends of IMRs and FMRs due to birth defects in the youngest and oldest maternal age groups. However, high  
9  
10 172 IMRs and FMRs due to birth defects in the youngest age group were more pronounced except for chromosomal abnormality. It is  
11  
12 173 known that adolescent pregnancy is associated with higher risks of adverse neonatal outcomes, such as low birth weight, preterm  
13  
14 174 delivery [23]. In regard to birth defects, gastroschisis has been shown to be higher in young mothers [24, 25]. However, there has been  
15  
16 175 no other associations between young maternal age and any other birth defect, to our knowledge. Although it is unclear whether high  
17  
18 176 IMRs and FMRs related to birth defects in the youngest maternal age group in this study are associated maternal age, or other social,  
19  
20 177 nutritional, and environmental factors, further investigation might be needed in the future. In addition, mandatory folic acid  
21  
22 178 fortification in Korea might help reduce nervous system anomalies because the youngest age group is less likely to take  
23  
24 179 periconceptional folic acid supplementation and the overall prevalence of spina bifida in Korea shows increasing tendency [13].  
25  
26  
27  
28  
29  
30 180 In Europe, increasing trend of trisomy 13, 18, and 21 between 1990 and 2009 was reported [9]. In Korea, most of prenatal screening  
31  
32 181 methods are available, such as the first trimester combined test, Quad screening, integrated, sequential test and cell-free DNA  
33  
34 182 screening [26]. However, the legally acceptable pregnancy termination is very restrictive in Korea. The maternal and child health law  
35  
36 183 only permits an abortion for one of the following reasons; if the pregnant woman or her spouse suffers from an eugenic or hereditary  
37  
38 184 mental or physical disease specified by presidential decree, if the woman or her spouse suffers from a communicable disease specified  
39  
40  
41  
42  
43  
44  
45  
46  
47  
48  
49

1  
2  
3 185 by presidential decree, if the pregnancy results from rape or incest or if continuation of the pregnancy is likely to jeopardize the  
4  
5 186 mother's health. Therefore, it is almost impossible to estimate the proportions of TOP due to birth defects among fetal deaths. An  
6  
7  
8 187 international study has reported that the total mean prevalence of Down syndrome (still births, live births, and TOP) is increased from  
9  
10 188 13.1 to 18.2/10,000 births between 1993 and 2004 with increasing maternal age [27]. However, the total mean prevalence of Down  
11  
12 189 syndrome births remains stable at 8.3/10,000 births, balanced by a great increase of TOP [27]. Maternal age at conception has  
13  
14 190 increased in Korea, although there are race/ethnic specific variations in birth defects [28]. IMR and FMR by Down syndrome was 0.27  
15  
16 191 per 10,000 live births and 1.78 per 10,000 total births, respectively. When we assume the prevalence of Down syndrome in as 3.7-4.7  
17  
18 192 per 10,000 live births from the previous studies in Korea [12, 13], infant survival rate of Down syndrome can be estimated  
19  
20 193 approximately 93.6%. Based on the increased prevalence of Down syndrome in the international study, according to increasing  
21  
22 194 maternal age [27], we can expect that TOP due to Down syndrome may be also considerable in Korea.  
23  
24  
25  
26 195 The first limitation of this study is that death cause of fetal/infant deaths might be mostly made by clinician without autopsy. Although  
27  
28 196 most autopsies performed in the Republic of Korea are forensic autopsies, the autopsy rates for total mortality and unusual death in  
29  
30 197 Korea were reported as 2.4% and 18.1%, respectively, in 2015, which were very low [29, 30]. It could be related with the  
31  
32 198 overwhelming majority of fetal losses due to unspecified nervous, cardiovascular, and other system. Because one or two disease  
33  
34 199 codes are registered as the main code in death registry, multiple anomalies might have been included in one category. The second  
35  
36 200 limitation of this study is that it does not show present prevalence of birth defects in live births. Therefore, it is necessary to establish a  
37  
38 201 comprehensive surveillance system with periodic production of data and monitoring to have effective prevention and management of  
39  
40  
41  
42  
43  
44  
45  
46  
47  
48  
49



1  
2  
3 202 birth defects. Lastly, this study did not include data on maternal nationality, paternal age, educational background, antenatal care, or  
4  
5 203 parents' occupation due to high rates of missing values. However, this study is the first one that reports IMRs and FMRs caused by  
6  
7 204 birth defects in Korea and different patterns according to maternal age group. Severe birth defects with high FMR were found to be  
8  
9 205 more common in extreme maternal age groups (the youngest and the oldest). Except chromosomal abnormality, most severe  
10  
11 206 anomalies, especially those of the nervous system and cardiovascular system, were more common in teenage pregnancies.  
12  
13  
14

15 207 As maternal age at conception is getting increased in Korea and screening tools are developing, prevalence and prenatal diagnosis of  
16  
17 208 chromosomal anomalies are likely to be increased. Multi-disciplinary cooperation among government, politician, clinicians, and non-  
18  
19 209 governmental organization is urgent not only for increasing fertility rate, but also for increasing healthy pregnancies with effective  
20  
21 210 prevention and management of birth defects, especially for extreme maternal age groups and for supporting complicated pregnancies.  
22  
23 211 A mandatory folic acid fortification needs to be discussed and considered in Korea.  
24  
25  
26

27  
28 212

### 30 213 **Author contributions**

31  
32  
33 214 We confirm that all the authors have made substantive intellectual contributions to the paper; they understand their role in taking  
34  
35 215 responsibility and being accountable for what is published. JCS conceptualized and reviewed the paper. HSK and DJK conceptualized  
36  
37 216 the paper, gathered the results, analyzed the data and wrote the article. YHC, JHW, SKC, and IYP analyzed the data and reviewed the  
38  
39 217 paper. YGP performed statistical analysis of the data.  
40  
41  
42

1  
2  
3 218  
4  
5  
6 219 **Funding**  
7  
8 220 This study was supported by Research Fund of Seoul St. Mary's Hospital, The Catholic University of Korea.  
9  
10 221  
11  
12 222 **Conflict of Interest**  
13  
14  
15 223 All authors have no conflict of interest related with this article.  
16  
17 224  
18  
19 225 **Details of ethics approval**  
20  
21  
22 226 We obtained approval from the institutional review board of Catholic University of Korea (KC17ZESI0409).  
23  
24  
25 227  
26  
27  
28 228  
29  
30  
31 229  
32  
33  
34 230 **References**  
35  
36  
37 231 **1** Honein MA, Paulozzi LJ, Cragan JD, Correa A. Evaluation of selected characteristics of pregnancy drug registries. *Teratology*  
38  
39 232 1999;60:356-64.  
40  
41  
42  
43  
44  
45  
46  
47  
48  
49

- 1  
2  
3 233 2 Kalter H, Warkany J. Congenital malformations (second of two parts). *N Engl J Med* 1983;308:491-7.  
4  
5 234 3 Kalter H, Warkany J. Medical progress. Congenital malformations: etiologic factors and their role in prevention (first of two  
6 parts). *N Engl J Med* 1983;308:424-31.  
7  
8 235  
9  
10 236 4 Petrini J, Damus K, Russell R, Poschman K, Davidoff MJ, Mattison D. Contribution of birth defects to infant mortality in the  
11 United States. *Teratology* 2002;66 Suppl 1:S3-6.  
12 237  
13  
14 238 5 Chung CS, Myriantopoulos NC. Congenital anomalies: mortality and morbidity, burden and classification. *Am J Med Genet*  
15 1987;27:505-23.  
16 239  
17  
18 240 6 Centers for Disease Control and Prevention (CDC). Improved national prevalence estimates for 18 selected major birth  
19 defects--United States, 1999-2001. *MMWR Morb Mortal Wkly Rep* 2006;54:1301-5.  
20 241  
21  
22 242 7 Bower C, D'Antoine H, Stanley FJ. Neural tube defects in Australia: trends in encephaloceles and other neural tube defects  
23 before and after promotion of folic acid supplementation and voluntary food fortification. *Birth Defects Res A Clin Mol Teratol*  
24 2009;85:269-73.  
25 243  
26 244  
27  
28 245 8 Khoshnood B, Greenlees R, Loane M, Dolk H; on behalf of the EUROCAT Program Management Committee; EUROCAT  
29 working group. Paper 2: EUROCAT public health indicators for congenital anomalies in Europe. *Birth Defects Res A Clin Mol*  
30 2011;91 Suppl 1:S16-22.  
31 246  
32 247  
33  
34 248 9 Loane M, Morris JK, Addor MC, Arriola L, Budd J, Doray B, et al. Twenty-year trends in the prevalence of Down syndrome  
35 and other trisomies in Europe: impact of maternal age and prenatal screening. *Eur J Hum Genet* 2013;21:27-33.  
36 249  
37  
38  
39  
40  
41  
42  
43  
44  
45  
46  
47  
48  
49

- 1  
2  
3 250 **10** Statistics Korea. *Birth Statistics in 2009-2015*. Daejeon: Statistics Korea, 2009.
- 4  
5 251 **11** Choi SH, Park YS, Shim KS, Choi YS, Chang JY, Hahn WH, et al. Recent trends in the incidence of multiple births and its  
6  
7 consequences on perinatal problems in Korea. *J Korean Med Sci* 2010;25:1191-6.
- 8 252  
9  
10 253 **12** Kim MA, Yee NH, Choi JS, Choi JY, Seo K. Prevalence of birth defects in Korean livebirths, 2005-2006. *J Korean Med Sci*  
11  
12 2012;27:1233-40.
- 13 254  
14  
15 255 **13** Lamichhane DK, Leem JH, Park M, Kim JA, Kim HC, Kim JH, Hong YC. Increased prevalence of some birth defects in Korea,  
16  
17 2009-2010. *BMC Pregnancy Childbirth*. 2016 Mar 22;16:61. doi: 10.1186/s12884-016-0841-z
- 18 256  
19  
20 257 **14** Statistics Korea. Causes of Death Statistics. Available at  
21  
22 258 <http://kostat.go.kr/portal/eng/surveyOutline/5/1/index.static> (accessed on 16 Aug, 2017)
- 23  
24 259 **15** Park HW, Lee BS, Lim G, Choi YS, Kim EA, Kim KS. A simplified formula using early blood gas analysis can predict  
25  
26 survival outcomes and the requirements for extracorporeal membrane oxygenation in congenital diaphragmatic hernia. *J*  
27 260  
28 *Korean Med Sci* 2013;28:924-8.
- 29 261  
30  
31 262 **16** Campbell BT, Herbst KW, Briden KE, Neff S, Ruscher KA, Hagadorn JI. Inhaled nitric oxide use in neonates with congenital  
32  
33 diaphragmatic hernia. *Pediatrics* 2014;134:e420-6.
- 34 263  
35  
36 264 **17** Lee JY, Jun JK, Lee J. Prenatal prediction of neonatal survival in cases diagnosed with congenital diaphragmatic hernia using  
37  
38 abdomen-to-thorax ratio determined by ultrasonography. *J Obstet Gynaecol Res* 2014;40:2037-43.
- 39 265  
40  
41 266 **18** Kim H, Sung SC, Kim SH, Chang YH, Lee HD, Park JA, et al. Early and late outcomes of total repair of tetralogy of Fallot:

- 1  
2  
3 267 risk factors for late right ventricular dilatation. *Interact Cardiovasc Thorac Surg* 2013;17:956-62.
- 4  
5 268 **19** Park CS, Lee JR, Lim HG, Kim WH, Kim YJ. The long-term result of total repair for tetralogy of Fallot. *Eur J Cardiothorac*  
6  
7 *Surg* 2010;38:311-7.
- 8 269  
9  
10 270 **20** De Wals P, Tairou F, Van Allen MI, Uh SH, Lowry RB, Sibbald B, et al. Reduction in neural-tube defects after folic acid  
11  
12 271 fortification in Canada. *N Engl J Med* 2007;357:135-42.
- 13  
14  
15 272 **21** Khoshnood B, Loane M, de Walle H, Arriola L, Addor MC, Barisic I, et al. Long term trends in prevalence of neural tube  
16  
17 273 defects in Europe: population based study. *Bmj* 2015;351:h5949.
- 18  
19  
20 274 **22** De-Regil LM, Pena-Rosas JP, Fernandez-Gaxiola AC, Rayco-Solon P. Effects and safety of periconceptional oral folate  
21  
22 275 supplementation for preventing birth defects. *Cochrane Database Syst Rev* 2015:CD007950.
- 23  
24 276 **23.** Ganchimeg T, Ota E, Morisaki N, Laopaiboon M, Lumbiganon P, Zhang J, et al. Pregnancy and childbirth outcomes among  
25  
26 277 adolescent mothers: a World Health Organization multicountry study. *BJOG*. 2014;121 Suppl 1:40-8.
- 27  
28  
29 278 **24.** Vu LT, Nobuhara KK, Laurent C, Shaw GM. Increasing prevalence of gastroschisis: Population-based study in California. *J*  
30  
31 279 *Pediatr* 2008; 152: 807–11.
- 32  
33  
34 280 **25.** Kirby RS, Marshall J, Tanner JP, Salemi JL, Feldkamp ML, Marengo L, et al. Prevalence and correlates of gastroschisis in 15  
35  
36 281 states, 1995 to 2005. *Obstet Gynecol* 2013; 122: 275–81.
- 37  
38  
39 282 **26** Park SY, Jang IA, Lee MA, Kim YJ, Chun SH, Park MH. Screening for chromosomal abnormalities using combined test in the  
40  
41 283 first trimester of pregnancy. *Obstet Gynecol Sc.* 2016;59(5):357-66.

- 1  
2  
3 284 **27** Cocchi G, Gualdi S, Bower C, Halliday J, Jonsson B, Myrelid A, et al. International trends of Down syndrome 1993-2004:  
4  
5 Births in relation to maternal age and terminations of pregnancies. *Birth Defects Res A Clin Mol Teratol* 2010;88:474-9.  
6 285  
7  
8 286 **28** Canfield MA, Honein MA, Yuskiv N, Xing J, Mai CT, Collins JS, et al. National estimates and race/ethnic-specific variation of  
9  
10 287 selected birth defects in the United States, 1999-2001. *Birth Defects Res A Clin Mol Teratol* 2006;76:747-56.  
11  
12  
13 288 **29** Park, JH, Na JY, Lee BW, Chung NE, Choi YS. A Statistical Analysis on Forensic Autopsies Performed in Korea in 2015.  
14  
15 289 *Korean J Leg Med.* 2016;40(4):104-18  
16  
17  
18 290 **30** Hoyert DL. The changing profile of autopsied deaths in the United States, 1972-2007. *NCHS Data Brief* 2011;67:1-8.  
19  
20 291  
21  
22 292  
23  
24 293  
25  
26  
27 294  
28  
29 295  
30  
31 296  
32  
33  
34 297  
35  
36 298  
37  
38  
39 299  
40  
41  
42  
43  
44  
45  
46  
47  
48  
49

Table 1. Demographic characteristics of total live births, total fetal deaths, total infant deaths, and fetal/infant deaths related with birth defect

| Parameters              | Total live births | Total fetal deaths | Total infant deaths | Infant deaths<br>by birth defects | Fetal deaths<br>by birth defects |
|-------------------------|-------------------|--------------------|---------------------|-----------------------------------|----------------------------------|
|                         | n=3,181,145       | n=43,385           | n=9563              | n=2,176                           | n=4,343                          |
| Maternal age (yr)       | 31.9 ± 26.7       | 30.7 ± 6.2         | 31.6 ± 5.0          | 31.7 ± 4.9                        | 21.2 ± 4.4                       |
| Gestational age (weeks) | 38.6 ± 2.3        | 20.1 ± 5.8         | 32.2 ± 6.6          | 35.9 ± 4.4                        | 31.8 ± 5.6                       |
| Birthweight (kg)        | 3.21 ± 0.48       | 0.69 ± 0.78        | 1.96 ± 1.15         | 2.47 ± 0.87                       | 0.51 ± 0.5                       |
| Multiple birth n (%)    | 101,797 (3.2)     | 3,818 (8.8)        | 1492 (15.6)         | 196 (9)                           | 200 (4.6)                        |

Data are mean ± standard deviation or no. (%) unless otherwise specified.

Table 2. Korean prevalence of fetal deaths and infant deaths caused by birth defect groups in 2009-2015

| Birth defects (ICD-10)             | Total N. of fetal and infant deaths caused by birth defect | Proportion (%) in birth defects | Prevalence per 10,000 live births and fetal deaths | N. of infant deaths caused by birth defect | Proportion (%) in birth defects | Prevalence per 10,000 live births | N. of fetal deaths caused by birth defect | Proportion (%) in birth defects | Prevalence per 10,000 total births |
|------------------------------------|------------------------------------------------------------|---------------------------------|----------------------------------------------------|--------------------------------------------|---------------------------------|-----------------------------------|-------------------------------------------|---------------------------------|------------------------------------|
| Nervous system (Q00-07)            | 970                                                        | 14.88                           | 3.01                                               | 136                                        | 6.25                            | 0.43                              | 834                                       | 19.20                           | 2.59                               |
| Eye, ear, face and neck (Q10-18)   | 8                                                          | 0.12                            | 0.02                                               | 1                                          | 0.05                            | 0.00                              | 7                                         | 0.16                            | 0.02                               |
| Circulatory system (Q20-28)        | 1605                                                       | 24.62                           | 4.98                                               | 1112                                       | 51.10                           | 3.50                              | 493                                       | 11.35                           | 1.53                               |
| Respiratory system (Q30-34)        | 115                                                        | 1.76                            | 0.36                                               | 87                                         | 4.00                            | 0.27                              | 28                                        | 0.64                            | 0.09                               |
| Cleft lip/ palate (Q35-37)         | 67                                                         | 1.03                            | 0.21                                               | 3                                          | 0.14                            | 0.01                              | 64                                        | 1.47                            | 0.20                               |
| Digestive system (Q38-45)          | 203                                                        | 3.11                            | 0.63                                               | 169                                        | 7.77                            | 0.53                              | 34                                        | 0.78                            | 0.11                               |
| Genital organs (Q50-56)            | 5                                                          | 0.08                            | 0.02                                               | 0                                          | 0.00                            | 0.00                              | 5                                         | 0.12                            | 0.02                               |
| Urinary system (Q60-64)            | 213                                                        | 3.27                            | 0.66                                               | 54                                         | 2.48                            | 0.17                              | 159                                       | 3.66                            | 0.49                               |
| Musculoskeletal system (Q65-79)    | 384                                                        | 5.89                            | 1.19                                               | 208                                        | 9.56                            | 0.65                              | 176                                       | 4.05                            | 0.55                               |
| Other and unspecified (Q80-89)     | 1291                                                       | 19.80                           | 4.00                                               | 186                                        | 8.55                            | 0.58                              | 1105                                      | 25.44                           | 3.43                               |
| Chromosomal abnormalities (Q90-99) | 1658                                                       | 25.43                           | 5.14                                               | 220                                        | 10.11                           | 0.69                              | 1438                                      | 33.11                           | 4.46                               |
| Total                              | 6519                                                       | 100.00                          | 20.22                                              | 2176                                       | 100.00                          | 2.64                              | 4343                                      | 100.00                          | 13.47                              |

ICD, International classification of diseases, 10th revision.



Table 3. Prevalence of infant and fetal deaths caused by major chromosomal abnormalities in Korea, 2009-2015

| Chromosomal birth defects             | Total N. of cases         | Proportion                 | Prevalence                | N. of infant deaths       | Proportion                 | Prevalence               | N. of fetal deaths        | Proportion                 | Prevalence                |
|---------------------------------------|---------------------------|----------------------------|---------------------------|---------------------------|----------------------------|--------------------------|---------------------------|----------------------------|---------------------------|
|                                       | caused by<br>birth defect | (%) in<br>birth<br>defects | per 10000<br>total births | caused by<br>birth defect | (%) in<br>birth<br>defects | per 10000<br>live births | caused by<br>birth defect | (%) in<br>birth<br>defects | per 10000<br>total births |
| Down's syndrome                       | 659                       | 10.11                      | 2.04                      | 85                        | 3.91                       | 0.27                     | 574                       | 13.22                      | 1.78                      |
| Trisomy 18                            | 340                       | 5.22                       | 1.05                      | 76                        | 3.49                       | 0.24                     | 264                       | 6.08                       | 0.82                      |
| Trisomy 13                            | 62                        | 0.95                       | 0.19                      | 21                        | 0.97                       | 0.07                     | 41                        | 0.94                       | 0.13                      |
| Klinefelter's syndrome                | 33                        | 0.51                       | 0.10                      | 0                         | 0.00                       | 0.00                     | 33                        | 0.76                       | 0.10                      |
| Turner's syndrome                     | 51                        | 0.78                       | 0.16                      | 0                         | 0.00                       | 0.00                     | 51                        | 1.17                       | 0.16                      |
| Other sex chromosome<br>abnormalities | 14                        | 0.21                       | 0.04                      | 0                         | 0.00                       | 0.00                     | 14                        | 0.32                       | 0.04                      |
| Triploidy                             | 14                        | 0.21                       | 0.04                      | 0                         | 0.00                       | 0.00                     | 14                        | 0.32                       | 0.04                      |
| Wolff-Hirschorn syndrome              | 5                         | 0.08                       | 0.02                      | 2                         | 0.09                       | 0.01                     | 3                         | 0.07                       | 0.01                      |
| Cri-du-chat syndrome                  | 5                         | 0.08                       | 0.02                      | 2                         | 0.09                       | 0.01                     | 3                         | 0.07                       | 0.01                      |
| Other chromosomal abnormalities       | 475                       | 7.29                       | 1.47                      | 34                        | 1.56                       | 0.11                     | 441                       | 10.15                      | 1.37                      |
| Total                                 | 1658                      | 25.43                      | 5.14                      | 220                       | 10.11                      | 0.69                     | 1438                      | 33.11                      | 4.46                      |

317

318

319

320

321

322

323

Table 4. Comparison of infant mortality by birth defect according to maternal age group

| Maternal age group                 | IMR               |                      |                    |                   |                     |                    |                   |                   |                      |  |
|------------------------------------|-------------------|----------------------|--------------------|-------------------|---------------------|--------------------|-------------------|-------------------|----------------------|--|
|                                    | I<br>(10-19<br>y) | OR<br>(95% CI)       | II<br>(20-29<br>y) | OR<br>(95%<br>CI) | III<br>(30-34<br>y) | IV<br>(35-39<br>y) | OR<br>(95%<br>CI) | V<br>(40-50<br>y) | OR<br>(95%<br>CI)    |  |
| Nervous system (Q00-07)            | 3.63              | <b>2 (1.97-2.03)</b> | 0.42               |                   | 0.32                | 0.52               |                   | 1.21              |                      |  |
| Eye, ear, face and neck (Q10-18)   | 0.00              |                      | 0.00               |                   | 0.01                | 0.00               |                   | 0.00              |                      |  |
| Circulatory system (Q20-28)        | 7.25              |                      | 3.29               |                   | 3.25                | 4.10               |                   | 6.04              |                      |  |
| Respiratory system (Q30-34)        | 0.00              |                      | 0.23               |                   | 0.24                | 0.32               |                   | 1.21              |                      |  |
| Cleft lip/ palate (Q35-37)         | 0.00              |                      | 0.00               |                   | 0.02                | 0.00               |                   | 0.00              |                      |  |
| Digestive system (Q38-45)          | 0.52              |                      | 0.57               |                   | 0.48                | 0.63               |                   | 0.40              |                      |  |
| Urinary system (Q60-64)            | 0.52              |                      | 0.18               |                   | 0.14                | 0.15               |                   | 0.67              |                      |  |
| Musculoskeletal system (Q65-79)    | 0.00              |                      | 0.60               |                   | 0.64                | 0.84               |                   | 0.67              |                      |  |
| Other and unspecified (Q80-89)     | 1.55              |                      | 0.46               |                   | 0.56                | 0.73               |                   | 1.61              |                      |  |
| Chromosomal abnormalities (Q90-99) | 0.00              |                      | 0.48               |                   | 0.50                | 1.27               |                   | 3.63              | <b>2 (1.97-2.03)</b> |  |
| Total                              | 13.47             |                      | 6.22               |                   | 6.16                | 8.56               |                   | 15.44             |                      |  |

ICD, International classification of diseases, 10th revision; IMR, Infant mortality rate; OR, odd ratio; CI, confidence interval. IMRs by birth defects in group III were used as a reference for comparison with IMRs of other groups. Statistically significant values were presented.

324

325

326

327

328

329

Table 5. Comparison of fetal mortality by birth defect according to maternal age group

| Maternal age group                  | FMR               |                           |                 |                   |                     |                   |                 |                       |                   |                           |
|-------------------------------------|-------------------|---------------------------|-----------------|-------------------|---------------------|-------------------|-----------------|-----------------------|-------------------|---------------------------|
|                                     | I<br>(10-19<br>y) | OR<br>(95% CI)            | II<br>(20-29 y) | OR<br>(95%<br>CI) | III<br>(30-34<br>y) | OR<br>(95%<br>CI) | IV<br>(35-39 y) | OR<br>(95% CI)        | V<br>(40-50<br>y) | OR<br>(95% CI)            |
| Nervous system (Q00-07)             | 29.84             | <b>15.04 (3.59-62.96)</b> | 2.63            | ·                 | 1.97                | ·                 | 2.64            | ·                     | 5.97              | ·                         |
| Eye, ear, face and neck (Q10-18)    | 0.45              | ·                         | 0.03            | ·                 | 0.01                | ·                 | 0.02            | ·                     | 0.13              | ·                         |
| Circulatory system (Q20-28)         | 9.95              | <b>10 (1.23-78.20)</b>    | 1.48            | ·                 | 1.34                | ·                 | 1.83            | ·                     | 1.43              | ·                         |
| Respiratory system (Q30-34)         | 0.45              | ·                         | 0.12            | ·                 | 0.06                | ·                 | 0.09            | ·                     | 0.00              | ·                         |
| Cleft lip/ palate (Q35-37)          | 0.00              | ·                         | 0.27            | ·                 | 0.18                | ·                 | 0.17            | ·                     | 0.13              | ·                         |
| Digestive system (Q38-45)           | 1.36              | ·                         | 0.12            | ·                 | 0.06                | ·                 | 0.13            | ·                     | 0.13              | ·                         |
| Genital organs (Q50-56)             | 0.51              | ·                         | 0.01            | ·                 | 0.02                | ·                 | 0.02            | ·                     | 0.00              | ·                         |
| Urinary system (Q60-64)             | 0.00              | ·                         | 0.52            | ·                 | 0.49                | ·                 | 0.31            | ·                     | 1.17              | ·                         |
| Musculoskeletal system (Q65-79)     | 0.90              | ·                         | 0.64            | ·                 | 0.49                | ·                 | 0.50            | ·                     | 0.26              | ·                         |
| Other and unspecified (Q80-89)      | 24.87             | <b>8.35 (2.52-27.67)</b>  | 3.40            | ·                 | 2.66                | ·                 | 4.13            | ·                     | 7.92              | ·                         |
| Chromosomal abnormalities (Q90-99)  | 4.07              | ·                         | 1.87            | ·                 | 3.39                | ·                 | 10.11           | ·                     | 20.64             | <b>7.01 (2.09-23.52)</b>  |
| Chromosomal abnormalities (Q90-99)* | 4.07              | ·                         | 1.87            | ·                 | 3.39                | ·                 | 10.11           | <b>5 (1.10-22.84)</b> | 20.64             | <b>10.52 (2.47-44.88)</b> |
| Total                               | 71.89             | <b>6.59 (3.49-12.43)</b>  | 11.07           | ·                 | 10.68               | ·                 | 19.95           | ·                     | 37.78             | <b>3.46 (1.77-6.78)</b>   |

ICD, International classification of diseases, 10th revision; FMR, fetal mortality rate; OR, odd ratio; CI, confidence interval. FMRs by birth defects in group III were used as a reference for comparison with FMRs of other groups. \*Comparison was performed between group II (reference) and the other groups. Statistically significant values were presented.

330

1  
2  
3  
4  
5  
6  
7  
8  
9  
10  
11  
12  
13  
14  
15  
16  
17  
18  
19  
20  
21  
22  
23  
24  
25  
26  
27  
28  
29  
30  
31  
32  
33  
34  
35  
36  
37  
38  
39  
40  
41  
42  
43  
44  
45  
46  
47  
48  
49

331

332 Figure 1. Infant mortality caused by birth defects, according to maternal age group.

333 Maternal age groups: '10-19 yr' (I), '20-29 yr' (II), '30-34 yr' (III), '35-39 yr' (IV), and '40-55 yr' (V).

334

335

336

337

338 Figure 2. Fetal mortality caused by birth defects, according to maternal age group.

339 Maternal age groups: '10-19 yr' (I), '20-29 yr' (II), '30-34 yr' (III), '35-39 yr' (IV), and '40-55 yr' (V).

340

Figure 1. Infant mortality caused by birth defects, according to maternal age group.  
 Maternal age groups: '10-19 yr' (I), '20-29 yr' (II), '30-34 yr' (III), '35-39 yr' (IV), and '40-55 yr' (V).

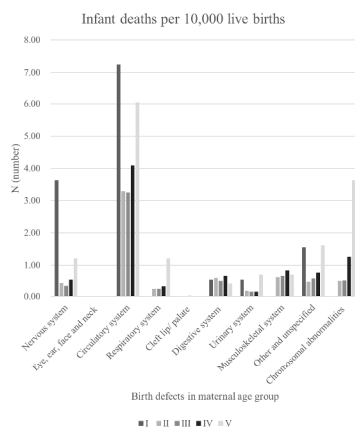

Figure 1. Infant mortality caused by birth defects, according to maternal age group.  
 Maternal age groups: '10-19 yr' (I), '20-29 yr' (II), '30-34 yr' (III), '35-39 yr' (IV), and '40-55 yr' (V).

338x190mm (300 x 300 DPI)

view only

1  
2  
3  
4  
5  
6  
7  
8  
9  
10  
11  
12  
13  
14  
15  
16  
17  
18  
19  
20  
21  
22  
23  
24  
25  
26  
27  
28  
29  
30  
31  
32  
33  
34  
35  
36  
37  
38  
39  
40  
41  
42  
43  
44  
45  
46  
47  
48  
49  
50  
51  
52  
53  
54  
55  
56  
57  
58  
59  
60

Figure 2. Fetal mortality caused by birth defects, according to maternal age group.  
Maternal age groups: '10-19 yr' (I), '20-29 yr' (II), '30-34 yr' (III), '35-39 yr' (IV), and '40-55 yr' (V).

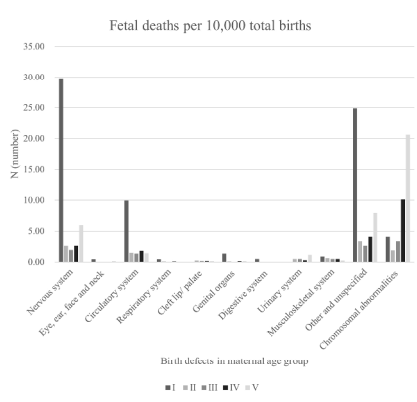

Figure 2. Fetal mortality caused by birth defects, according to maternal age group.  
Maternal age groups: '10-19 yr' (I), '20-29 yr' (II), '30-34 yr' (III), '35-39 yr' (IV), and '40-55 yr' (V).

338x190mm (300 x 300 DPI)

Review only

Supplementary material.

Korean prevalence of fetal deaths and infant deaths caused by birth defect subtypes in 2009-2015

|                                                          | N. of infant deaths | Proportion | Prevalence | N. of fetal deaths | Proportion | Prevalence   |
|----------------------------------------------------------|---------------------|------------|------------|--------------------|------------|--------------|
| Birth defects (ICD-10)                                   | caused by           | (%) in     | per 10000  | caused by          | (%) in     | per 10000    |
|                                                          | birth defect        | birth      | livebirths | birth defect       | birth      | total births |
|                                                          | defects             | defects    |            | defects            | defects    |              |
| <b>Nervous system (Q00-07)</b>                           |                     |            |            |                    |            |              |
| Anencephaly (Q00.0-00.2)                                 | 37                  | 1.70       | 0.12       | 213                | 4.90       | 0.66         |
| Encephalocele (Q01.0-01.9)                               | 3                   | 0.14       | 0.01       | 32                 | 0.74       | 0.10         |
| Congenital Hydrocephalus (Q03.0-03.9)                    | 34                  | 1.56       | 0.11       | 157                | 3.62       | 0.49         |
| Holoprosencephaly (Q04.0-04.2)                           | 14                  | 0.64       | 0.04       | 46                 | 1.06       | 0.14         |
| Other brain anomaly (Q43-49)                             | 36                  | 1.65       | 0.11       | 131                | 3.02       | 0.41         |
| Spina bifida (Q05.0-05.9)                                | 8                   | 0.37       | 0.03       | 28                 | 0.64       | 0.09         |
| Other spinal anomaly (Q68-69)                            | 0                   | 0.00       | 0.00       | 3                  | 0.07       | 0.01         |
| Arnold-Chiari malformation (Q70)                         | 1                   | 0.05       | 0.00       | 18                 | 0.41       | 0.06         |
| Other nervous system anomaly (Q78-79)                    | 3                   | 0.14       | 0.01       | 206                | 4.74       | 0.64         |
| <b>Eye, ear, face and neck (Q10-18)</b>                  | 1                   | 0.05       | 0.00       | 7                  | 0.16       | 0.02         |
| <b>Circulatory system (Q20-28)</b>                       |                     |            |            |                    |            |              |
| Truncus arteriosus (Q20.0)                               | 9                   | 0.41       | 0.03       | 1                  | 0.02       | 0.00         |
| Double outlet right ventricle                            | 66                  | 3.03       | 0.21       | 7                  | 0.16       | 0.02         |
| Transposition of great arteries (Q20.1-20.3)             | 72                  | 3.31       | 0.23       | 0                  | 0.00       | 0.00         |
| Double inlet ventricle (Q20.4)                           | 58                  | 2.67       | 0.18       | 1                  | 0.02       | 0.00         |
| Discordant atrioventricular connection (Q20.5)           | 2                   | 0.09       | 0.01       | 1                  | 0.02       | 0.00         |
| Isomerism of atrial appendages (Q20.6)                   | 3                   | 0.14       | 0.01       | 1                  | 0.02       | 0.00         |
| Ventricular septal defect (Q21.0)                        | 50                  | 2.30       | 0.16       | 20                 | 0.46       | 0.06         |
| Atrial septal defect (Q21.1)                             | 20                  | 0.92       | 0.06       | 2                  | 0.05       | 0.01         |
| Atrioventricular septal defect (Q21.2)                   | 72                  | 3.31       | 0.23       | 4                  | 0.09       | 0.01         |
| Tetralogy of Fallot (Q21.3)                              | 88                  | 4.04       | 0.28       | 21                 | 0.48       | 0.07         |
| Other malformations of cardiac septa (Q21.4, 21.8, 21.9) | 6                   | 0.28       | 0.02       | 10                 | 0.23       | 0.03         |
| Pulmonary valve atresia/stenosis (Q22.0-22.1)            | 52                  | 2.39       | 0.16       | 1                  | 0.02       | 0.00         |
| Congenital tricuspid stenosis (Q22.4)                    | 5                   | 0.23       | 0.02       | 1                  | 0.02       | 0.00         |
| Ebstein's anomaly (Q22.5)                                | 23                  | 1.06       | 0.07       | 7                  | 0.16       | 0.02         |
| Hypoplastic right heart syndrome (Q22.6)                 | 1                   | 0.05       | 0.00       | 1                  | 0.02       | 0.00         |
| Other malformations of tricuspid valve (Q22.8, 22.9)     | 3                   | 0.14       | 0.01       | 4                  | 0.09       | 0.01         |
| Aortic valve stenosis/insufficiency (Q23.0, 23.1)        | 9                   | 0.41       | 0.03       | 3                  | 0.07       | 0.01         |

|    |                                                                                                        |    |      |      |     |      |      |
|----|--------------------------------------------------------------------------------------------------------|----|------|------|-----|------|------|
| 1  |                                                                                                        |    |      |      |     |      |      |
| 2  |                                                                                                        |    |      |      |     |      |      |
| 3  |                                                                                                        |    |      |      |     |      |      |
| 4  | Mitral valve stenosis/insufficiency (Q23.2, 23.3)                                                      | 8  | 0.37 | 0.03 | 0   | 0.00 | 0.00 |
| 5  | Hypoplastic left heart syndrome (Q23.4)                                                                | 86 | 3.95 | 0.27 | 7   | 0.16 | 0.02 |
| 6  | Dextrocardia (Q 24.0)                                                                                  | 0  | 0.00 | 0.00 | 3   | 0.07 | 0.01 |
| 7  | Cor triatrium (Q 24.2)                                                                                 | 2  | 0.09 | 0.01 | 0   | 0.00 | 0.00 |
| 8  |                                                                                                        |    |      |      |     |      |      |
| 9  | Subaortic stenosis (Q 24.4)                                                                            | 2  | 0.09 | 0.01 | 0   | 0.00 | 0.00 |
| 10 |                                                                                                        |    |      |      |     |      |      |
| 11 | Malformation of coronary vessels (Q24.5-24.6)                                                          | 6  | 0.28 | 0.02 | 0   | 0.00 | 0.00 |
| 12 |                                                                                                        |    |      |      |     |      |      |
| 13 | Other heart malformation (Q24.2, 24.4-24.6)                                                            | 88 | 4.04 | 0.28 | 50  | 1.15 | 0.16 |
| 14 | Unspecified heart malformation (Q24.9)                                                                 | 75 | 3.45 | 0.24 | 299 | 6.88 | 0.93 |
| 15 | Patent ductus arteriosus (Q25.0)*                                                                      | 87 | 4.00 | 0.27 | 0   | 0.00 | 0.00 |
| 16 |                                                                                                        |    |      |      |     |      |      |
| 17 | Coarctation/atresia/stenosis of aorta (Q25.1-25.3)                                                     | 55 | 2.53 | 0.17 | 0   | 0.00 | 0.00 |
| 18 |                                                                                                        |    |      |      |     |      |      |
| 19 | Other malformations of aorta (Q25.4)                                                                   | 18 | 0.83 | 0.06 | 4   | 0.09 | 0.01 |
| 20 |                                                                                                        |    |      |      |     |      |      |
| 21 | Pulmonary artery atresia/stenosis (Q25.5, 25.6)                                                        | 22 | 1.01 | 0.07 | 2   | 0.05 | 0.01 |
| 22 |                                                                                                        |    |      |      |     |      |      |
| 23 | Total anomalous pulmonary venous connection (Q26.2)                                                    | 83 | 3.81 | 0.26 | 0   | 0.00 | 0.00 |
| 24 | Partial anomalous pulmonary venous connection (Q26.3)                                                  | 3  | 0.14 | 0.01 | 1   | 0.02 | 0.00 |
| 25 | Peripheral arteriovenous malformation (Q27.3, 27.9, 27.9)                                              | 1  | 0.05 | 0.00 | 4   | 0.09 | 0.01 |
| 26 |                                                                                                        |    |      |      |     |      |      |
| 27 | Malformations of cerebral vessels (Q 28.2, 28.3)                                                       | 6  | 0.28 | 0.02 | 4   | 0.09 | 0.01 |
| 28 |                                                                                                        |    |      |      |     |      |      |
| 29 | Other malformations of circulatory system (Q20.8, 20.9, 22.3, 25.7-26.1, 26.4, 27.0, 26.8, 28.8, 28.9) | 31 | 1.42 | 0.10 | 34  | 0.78 | 0.11 |
| 30 |                                                                                                        |    |      |      |     |      |      |
| 31 |                                                                                                        |    |      |      |     |      |      |
| 32 | <b>Respiratory system (Q30-34)</b>                                                                     |    |      |      |     |      |      |
| 33 | Other malformations of larynx, bronchus, trachea (Q31.0-32.4)                                          | 34 | 1.56 | 0.11 | 3   | 0.07 | 0.01 |
| 34 |                                                                                                        |    |      |      |     |      |      |
| 35 | Congenital cystic lung (Q33.0)                                                                         | 5  | 0.23 | 0.02 | 5   | 0.12 | 0.02 |
| 36 |                                                                                                        |    |      |      |     |      |      |
| 37 | Other malformation of lung (Q33.1-33.9)                                                                | 42 | 1.93 | 0.13 | 16  | 0.37 | 0.05 |
| 38 | Other malformations of respiratory system (Q34)                                                        | 6  | 0.28 | 0.02 | 4   | 0.09 | 0.01 |
| 39 |                                                                                                        |    |      |      |     |      |      |
| 40 | <b>Cleft lip/palate (Q35-37)</b>                                                                       | 3  | 0.14 | 0.01 | 64  | 1.47 | 0.20 |
| 41 |                                                                                                        |    |      |      |     |      |      |
| 42 | <b>Digestive system (Q38-45)</b>                                                                       |    |      |      |     |      |      |
| 43 | Other malformation of mouths (Q38.5)                                                                   | 0  | 0.00 | 0.00 | 1   | 0.02 | 0.00 |
| 44 |                                                                                                        |    |      |      |     |      |      |
| 45 | Esophageal atresia/stenosis (Q39.0-39.2)                                                               | 34 | 1.56 | 0.11 | 6   | 0.14 | 0.02 |
| 46 | Malformation of upper elementary tract (Q40.0-40.9)                                                    | 3  | 0.14 | 0.01 | 3   | 0.07 | 0.01 |
| 47 |                                                                                                        |    |      |      |     |      |      |
| 48 | Duodenal atresia/stenosis (Q41.0)                                                                      | 3  | 0.14 | 0.01 | 7   | 0.16 | 0.02 |
| 49 |                                                                                                        |    |      |      |     |      |      |
| 50 | Small intestine atresia/stenosis (Q41.1-41.9)                                                          | 22 | 1.01 | 0.07 | 1   | 0.02 | 0.00 |
| 51 |                                                                                                        |    |      |      |     |      |      |
| 52 | Anorectal atresia/stenosis (Q42.0-42.3)                                                                | 2  | 0.09 | 0.01 | 2   | 0.05 | 0.01 |
| 53 |                                                                                                        |    |      |      |     |      |      |
| 54 | Congenital megacolon (Q43.1)                                                                           | 44 | 2.02 | 0.14 | 0   | 0.00 | 0.00 |
| 55 | Malrotation of colon (Q43.3)                                                                           | 9  | 0.41 | 0.03 | 0   | 0.00 | 0.00 |
| 56 |                                                                                                        |    |      |      |     |      |      |
| 57 | Persistent cloaca (Q43.7)                                                                              | 1  | 0.05 | 0.00 | 2   | 0.05 | 0.01 |
| 58 |                                                                                                        |    |      |      |     |      |      |
| 59 |                                                                                                        |    |      |      |     |      |      |
| 60 |                                                                                                        |    |      |      |     |      |      |



|    |                                                                   |    |      |      |    |           |
|----|-------------------------------------------------------------------|----|------|------|----|-----------|
| 1  |                                                                   |    |      |      |    |           |
| 2  |                                                                   |    |      |      |    |           |
| 3  |                                                                   |    |      |      |    |           |
| 4  | Other intestinal and bile duct malformation (Q43.8-44.3)          | 42 | 1.93 | 0.13 | 6  | 0.14 0.02 |
| 5  | Liver malformation (Q44.7)                                        | 4  | 0.18 | 0.01 | 0  | 0.00 0.00 |
| 6  |                                                                   |    |      |      |    |           |
| 7  | Other malformation of digestive system (Q 42.8, 43.0, 45.8, 45.9) | 5  | 0.23 | 0.02 | 6  | 0.14 0.02 |
| 8  |                                                                   |    |      |      |    |           |
| 9  | <b>Genital organs (Q50-56)</b>                                    | 0  | 0.00 | 0.00 | 5  | 0.12 0.02 |
| 10 |                                                                   |    |      |      |    |           |
| 11 | <b>Urinary system (Q60-64)</b>                                    |    |      |      |    |           |
| 12 | Renal agenesis (Q60.0-60.6)                                       | 22 | 1.01 | 0.07 | 44 | 1.01 0.14 |
| 13 | Autosomal recessive polycystic kidney (Q61.1)                     | 10 | 0.46 | 0.03 | 6  | 0.14 0.02 |
| 14 | Unspecified polycystic kidney (Q61.3)                             | 6  | 0.28 | 0.02 | 23 | 0.53 0.07 |
| 15 | Renal dysplasia (Q61.4)                                           | 6  | 0.28 | 0.02 | 30 | 0.69 0.09 |
| 16 | Cystic kidney (Q61.0, Q61.5-61.9)                                 | 1  | 0.05 | 0.00 | 3  | 0.07 0.01 |
| 17 | Congenital hydronephrosis (Q62.0-62.8)                            | 2  | 0.09 | 0.01 | 14 | 0.32 0.04 |
| 18 | Other renal anomaly (Q63.0, 63.2, 63.8, 63.9)                     | 3  | 0.14 | 0.01 | 30 | 0.69 0.09 |
| 19 | Posterior urethral valve (Q64.2)                                  | 3  | 0.14 | 0.01 | 3  | 0.07 0.01 |
| 20 | Congenital absence of bladder and urethra (Q64.5-64.9)            | 1  | 0.05 | 0.00 | 6  | 0.14 0.02 |
| 21 |                                                                   |    |      |      |    |           |
| 22 | <b>Musculoskeletal system (Q65-79)</b>                            |    |      |      |    |           |
| 23 |                                                                   |    |      |      |    |           |
| 24 | Club foot-talipes equinovarus (66.0)                              | 0  | 0.00 | 0.00 | 1  | 0.02 0.00 |
| 25 | Other congenital feet deformities (Q66.1-66.9)                    | 0  | 0.00 | 0.00 | 4  | 0.09 0.01 |
| 26 | Congenital deformities of skull, face, and jaw (Q67.0-67.4)       | 0  | 0.00 | 0.00 | 2  | 0.05 0.01 |
| 27 | Pectus carinatum (Q67.6)                                          | 2  | 0.09 | 0.01 | 0  | 0.00 0.00 |
| 28 | Other congenital musculoskeletal deformities (Q68.0-Q70.9)        | 0  | 0.00 | 0.00 | 12 | 0.28 0.04 |
| 29 | Total limb reduction defects (Q71.0-71.9, Q72.0-72.9, Q73.0-73.8) | 0  | 0.00 | 0.00 | 8  | 0.18 0.02 |
| 30 | Other malformation of limbs and pelvic girdle (Q74.0-Q74.2, 74.8) | 3  | 0.14 | 0.01 | 19 | 0.44 0.06 |
| 31 | Arthrogryposis multiplex congenita (Q74.3)                        | 4  | 0.18 | 0.01 | 1  | 0.02 0.00 |
| 32 | Craniosynostosis (Q75.0)                                          | 6  | 0.28 | 0.02 | 0  | 0.00 0.00 |
| 33 | Malformations of skull and face bones (Q75.1-75.9)                | 6  | 0.28 | 0.02 | 7  | 0.16 0.02 |
| 34 | Klippel-Feil syndrome (Q76.1)                                     | 2  | 0.09 | 0.01 | 0  | 0.00 0.00 |
| 35 | Malformations of spine and bony thorax (Q76.2-76.9)               | 2  | 0.09 | 0.01 | 7  | 0.16 0.02 |
| 36 | Achondrogenesis/Hypochondrogenesis (Q77.0)                        | 2  | 0.09 | 0.01 | 1  | 0.02 0.00 |
| 37 | Thanatophoric dysplasia (Q77.1)                                   | 7  | 0.32 | 0.02 | 20 | 0.46 0.06 |
| 38 | Asphyxiating thoracic dysplasia (Q77.2)                           | 1  | 0.05 | 0.00 | 3  | 0.07 0.01 |
| 39 | Achondroplasia/hypochondroplasia (Q77.4)                          | 3  | 0.14 | 0.01 | 9  | 0.21 0.03 |
| 40 | Osteogenesis imperfecta (Q78.0)                                   | 2  | 0.09 | 0.01 | 6  | 0.14 0.02 |
| 41 |                                                                   |    |      |      |    |           |
| 42 |                                                                   |    |      |      |    |           |
| 43 |                                                                   |    |      |      |    |           |
| 44 |                                                                   |    |      |      |    |           |
| 45 |                                                                   |    |      |      |    |           |
| 46 |                                                                   |    |      |      |    |           |
| 47 |                                                                   |    |      |      |    |           |
| 48 |                                                                   |    |      |      |    |           |
| 49 |                                                                   |    |      |      |    |           |
| 50 |                                                                   |    |      |      |    |           |
| 51 |                                                                   |    |      |      |    |           |
| 52 |                                                                   |    |      |      |    |           |
| 53 |                                                                   |    |      |      |    |           |
| 54 |                                                                   |    |      |      |    |           |
| 55 |                                                                   |    |      |      |    |           |
| 56 |                                                                   |    |      |      |    |           |
| 57 |                                                                   |    |      |      |    |           |
| 58 |                                                                   |    |      |      |    |           |
| 59 |                                                                   |    |      |      |    |           |
| 60 |                                                                   |    |      |      |    |           |

|    |                                                 |     |       |      |      |       |      |
|----|-------------------------------------------------|-----|-------|------|------|-------|------|
| 1  |                                                 |     |       |      |      |       |      |
| 2  |                                                 |     |       |      |      |       |      |
| 3  |                                                 |     |       |      |      |       |      |
| 4  | Other osteochondrodysplasia (Q77.8, 78.8, 78.9) | 2   | 0.09  | 0.01 | 4    | 0.09  | 0.01 |
| 5  | Diaphragmatic hernia (Q79.0)                    | 138 | 6.34  | 0.43 | 22   | 0.51  | 0.07 |
| 6  | Other malformations of diaphragm (Q79.1)        | 6   | 0.28  | 0.02 | 1    | 0.02  | 0.00 |
| 7  | Omphalocele (Q79.2)                             | 10  | 0.46  | 0.03 | 15   | 0.35  | 0.05 |
| 8  | Gastroschisis (Q79.3)                           | 8   | 0.37  | 0.03 | 12   | 0.28  | 0.04 |
| 9  | Prune belly syndrome (Q79.4)                    | 0   | 0.00  | 0.00 | 3    | 0.07  | 0.01 |
| 10 | Other musculoskeletal anomaly (Q79.8, 79.9)     | 4   | 0.18  | 0.01 | 19   | 0.44  | 0.06 |
| 11 | <b>Other and unspecified (Q80-89)</b>           | 186 | 8.55  | 0.58 | 1105 | 25.44 | 3.43 |
| 12 | <b>Chromosomal abnormalities (Q90-99)</b>       | 220 | 10.11 | 0.69 | 1438 | 33.11 | 4.46 |

\*Patent ductus arteriosus cases included 81 cases whose birthweight was less than 2,500 g.

N, number.

**STROBE 2007 (v4) checklist of items to be included in reports of observational studies in epidemiology\***  
**Checklist for cohort, case-control, and cross-sectional studies (combined)**

| Section/Topic             | Item # | Recommendation                                                                                                                                                                                                                                                                                                                                                                                                                                                         | Reported on page # |
|---------------------------|--------|------------------------------------------------------------------------------------------------------------------------------------------------------------------------------------------------------------------------------------------------------------------------------------------------------------------------------------------------------------------------------------------------------------------------------------------------------------------------|--------------------|
| Title and abstract        | 1      | (a) Indicate the study's design with a commonly used term in the title or the abstract                                                                                                                                                                                                                                                                                                                                                                                 | 1,2                |
|                           |        | (b) Provide in the abstract an informative and balanced summary of what was done and what was found                                                                                                                                                                                                                                                                                                                                                                    | 2                  |
| <b>Introduction</b>       |        |                                                                                                                                                                                                                                                                                                                                                                                                                                                                        |                    |
| Background/rationale      | 2      | Explain the scientific background and rationale for the investigation being reported                                                                                                                                                                                                                                                                                                                                                                                   | 3,4                |
| Objectives                | 3      | State specific objectives, including any pre-specified hypotheses                                                                                                                                                                                                                                                                                                                                                                                                      | 4                  |
| <b>Methods</b>            |        |                                                                                                                                                                                                                                                                                                                                                                                                                                                                        |                    |
| Study design              | 4      | Present key elements of study design early in the paper                                                                                                                                                                                                                                                                                                                                                                                                                | 4,5                |
| Setting                   | 5      | Describe the setting, locations, and relevant dates, including periods of recruitment, exposure, follow-up, and data collection                                                                                                                                                                                                                                                                                                                                        | 4,5                |
| Participants              | 6      | (a) <i>Cohort study</i> —Give the eligibility criteria, and the sources and methods of selection of participants. Describe methods of follow-up<br><i>Case-control study</i> —Give the eligibility criteria, and the sources and methods of case ascertainment and control selection. Give the rationale for the choice of cases and controls<br><i>Cross-sectional study</i> —Give the eligibility criteria, and the sources and methods of selection of participants | 4,5                |
|                           |        | (b) <i>Cohort study</i> —For matched studies, give matching criteria and number of exposed and unexposed<br><i>Case-control study</i> —For matched studies, give matching criteria and the number of controls per case                                                                                                                                                                                                                                                 |                    |
| Variables                 | 7      | Clearly define all outcomes, exposures, predictors, potential confounders, and effect modifiers. Give diagnostic criteria, if applicable                                                                                                                                                                                                                                                                                                                               | 4,5                |
| Data sources/ measurement | 8*     | For each variable of interest, give sources of data and details of methods of assessment (measurement). Describe comparability of assessment methods if there is more than one group                                                                                                                                                                                                                                                                                   | 5                  |
| Bias                      | 9      | Describe any efforts to address potential sources of bias                                                                                                                                                                                                                                                                                                                                                                                                              | 5                  |
| Study size                | 10     | Explain how the study size was arrived at                                                                                                                                                                                                                                                                                                                                                                                                                              | 5                  |
| Quantitative variables    | 11     | Explain how quantitative variables were handled in the analyses. If applicable, describe which groupings were chosen and why                                                                                                                                                                                                                                                                                                                                           | 5                  |
| Statistical methods       | 12     | (a) Describe all statistical methods, including those used to control for confounding                                                                                                                                                                                                                                                                                                                                                                                  | 6                  |
|                           |        | (b) Describe any methods used to examine subgroups and interactions                                                                                                                                                                                                                                                                                                                                                                                                    | 6                  |
|                           |        | (c) Explain how missing data were addressed                                                                                                                                                                                                                                                                                                                                                                                                                            | 6                  |
|                           |        | (d) <i>Cohort study</i> —If applicable, explain how loss to follow-up was addressed<br><i>Case-control study</i> —If applicable, explain how matching of cases and controls was addressed                                                                                                                                                                                                                                                                              | Not applicable     |

|                          |     |                                                                                                                                                                                                              |       |
|--------------------------|-----|--------------------------------------------------------------------------------------------------------------------------------------------------------------------------------------------------------------|-------|
|                          |     | <i>Cross-sectional study</i> —If applicable, describe analytical methods taking account of sampling strategy                                                                                                 |       |
|                          |     | (e) Describe any sensitivity analyses                                                                                                                                                                        | 6     |
| <b>Results</b>           |     |                                                                                                                                                                                                              |       |
| Participants             | 13* | (a) Report numbers of individuals at each stage of study—eg numbers potentially eligible, examined for eligibility, confirmed eligible, included in the study, completing follow-up, and analysed            | 7     |
|                          |     | (b) Give reasons for non-participation at each stage                                                                                                                                                         | 7     |
|                          |     | (c) Consider use of a flow diagram                                                                                                                                                                           |       |
| Descriptive data         | 14* | (a) Give characteristics of study participants (eg demographic, clinical, social) and information on exposures and potential confounders                                                                     | 7     |
|                          |     | (b) Indicate number of participants with missing data for each variable of interest                                                                                                                          | 7     |
|                          |     | (c) <i>Cohort study</i> —Summarise follow-up time (eg, average and total amount)                                                                                                                             | 7     |
| Outcome data             | 15* | <i>Cohort study</i> —Report numbers of outcome events or summary measures over time                                                                                                                          | 7,8,9 |
|                          |     | <i>Case-control study</i> —Report numbers in each exposure category, or summary measures of exposure                                                                                                         |       |
|                          |     | <i>Cross-sectional study</i> —Report numbers of outcome events or summary measures                                                                                                                           |       |
| Main results             | 16  | (a) Give unadjusted estimates and, if applicable, confounder-adjusted estimates and their precision (eg, 95% confidence interval). Make clear which confounders were adjusted for and why they were included | 7-9   |
|                          |     | (b) Report category boundaries when continuous variables were categorized                                                                                                                                    | 7-9   |
|                          |     | (c) If relevant, consider translating estimates of relative risk into absolute risk for a meaningful time period                                                                                             | 7-9   |
| Other analyses           | 17  | Report other analyses done—eg analyses of subgroups and interactions, and sensitivity analyses                                                                                                               | 7-9   |
| <b>Discussion</b>        |     |                                                                                                                                                                                                              |       |
| Key results              | 18  | Summarise key results with reference to study objectives                                                                                                                                                     | 9-13  |
| Limitations              | 19  | Discuss limitations of the study, taking into account sources of potential bias or imprecision. Discuss both direction and magnitude of any potential bias                                                   | 9-13  |
| Interpretation           | 20  | Give a cautious overall interpretation of results considering objectives, limitations, multiplicity of analyses, results from similar studies, and other relevant evidence                                   | 9-13  |
| Generalisability         | 21  | Discuss the generalisability (external validity) of the study results                                                                                                                                        | 9-13  |
| <b>Other information</b> |     |                                                                                                                                                                                                              |       |
| Funding                  | 22  | Give the source of funding and the role of the funders for the present study and, if applicable, for the original study on which the present article is based                                                | 14    |

\*Give information separately for cases and controls in case-control studies and, if applicable, for exposed and unexposed groups in cohort and cross-sectional studies.

**Note:** An Explanation and Elaboration article discusses each checklist item and gives methodological background and published examples of transparent reporting. The STROBE checklist is best used in conjunction with this article (freely available on the Web sites of PLoS Medicine at <http://www.plosmedicine.org/>, Annals of Internal Medicine at <http://www.annals.org/>, and Epidemiology at <http://www.epidem.com/>). Information on the STROBE Initiative is available at [www.strobe-statement.org](http://www.strobe-statement.org).

# BMJ Open

## A national cohort study evaluating infant and fetal mortality caused by birth defects in Korea

|                                 |                                                                                                                                                                                                                                                                                                                                                                                                                                                                                                                                                                                                                 |
|---------------------------------|-----------------------------------------------------------------------------------------------------------------------------------------------------------------------------------------------------------------------------------------------------------------------------------------------------------------------------------------------------------------------------------------------------------------------------------------------------------------------------------------------------------------------------------------------------------------------------------------------------------------|
| Journal:                        | <i>BMJ Open</i>                                                                                                                                                                                                                                                                                                                                                                                                                                                                                                                                                                                                 |
| Manuscript ID                   | bmjopen-2017-017963.R2                                                                                                                                                                                                                                                                                                                                                                                                                                                                                                                                                                                          |
| Article Type:                   | Research                                                                                                                                                                                                                                                                                                                                                                                                                                                                                                                                                                                                        |
| Date Submitted by the Author:   | 04-Oct-2017                                                                                                                                                                                                                                                                                                                                                                                                                                                                                                                                                                                                     |
| Complete List of Authors:       | Ko, Hyun Sun; Catholic University of Korea School of Medicine, Kim, Dong Joo; Catholic University of Korea, obstetrics and gynecology; St. Mary's women's hospital, Obstetrics and gynecology<br>Chung, Yoohyun; Catholic University of Korea School of Medicine<br>Wie, Jeong Ha; Catholic University of Korea School of Medicine<br>Choi, Sae Kyung; Catholic University of Korea School of Medicine<br>Park, In Yarg; Catholic University of Korea School of Medicine<br>Park, Yong Gyu; Catholic University of Korea School of Medicine<br>Shin, Jong Chul; Catholic University of Korea School of Medicine |
| <b>Primary Subject Heading</b>: | Epidemiology                                                                                                                                                                                                                                                                                                                                                                                                                                                                                                                                                                                                    |
| Secondary Subject Heading:      | Obstetrics and gynaecology, Health policy, Public health                                                                                                                                                                                                                                                                                                                                                                                                                                                                                                                                                        |
| Keywords:                       | birth defect, infant, fetal, mortality, maternal age                                                                                                                                                                                                                                                                                                                                                                                                                                                                                                                                                            |
|                                 |                                                                                                                                                                                                                                                                                                                                                                                                                                                                                                                                                                                                                 |

SCHOLARONE™  
Manuscripts

1  
2  
3  
4 1 **A national cohort study evaluating infant and fetal mortality caused by birth defects in Korea**

5  
6  
7 2 Hyun Sun Ko,<sup>1#</sup> Dong Joo Kim,<sup>2,3#</sup> Yoohyun Chung,<sup>1</sup> Jeong Ha Wie,<sup>1</sup> Sae Kyung Choi,<sup>1</sup> In Yang Park,<sup>1</sup> Yong-gyu Park,<sup>4</sup> Jong Chul

9  
10  
11 3 Shin<sup>1\*</sup>

12  
13  
14  
15 5 <sup>1</sup>Department of Obstetrics and Gynecology, College of Medicine, The Catholic University of Korea, Seoul, Republic of Korea,

16  
17 6 <sup>2</sup>Department of Obstetrics and Gynecology, Graduate school, The Catholic University of Korea, Seoul, Republic of Korea,

18  
19 7 <sup>3</sup>Department of Obstetrics and Gynecology, St. Mary's women's hospital, Suwon, Republic of Korea, <sup>4</sup>Department of Biostatistics,

20  
21  
22 8 College of Medicine, The Catholic University of Korea, Seoul, Republic of Korea

23  
24  
25 9

26  
27  
28 10 # Hyun Sun Ko and Dong Joo Kim equally contributed to this work.

29  
30  
31  
32 11 \*Corresponding Author: Jong Chul Shin

33  
34  
35 12 Department of Obstetrics and Gynecology, Seoul St. Mary's Hospital, College of Medicine, The Catholic University of Korea, 222,

36  
37 13 Banpo-daero, Seocho-gu, Seoul, 06591, Republic of Korea

38  
39  
40 14 Tel: +82-2-2258-6169, Fax: +82-2-595-1549, E-mail: jcshin@catholic.ac.kr

1  
2  
3 15 Key words; birth defect, infant death, fetal death, maternal age  
4  
5

6 16 **Running title: Infant and fetal mortality caused by birth defects in Korea**  
7

8  
9 17 Tweetable abstract: Severe anomalies except chromosomal abnormality were the most prevalent in teenage pregnancies.  
10

11 18 Abstract  
12

13  
14  
15 19 Objective: To analyze the prevalence of fetal and infant deaths due to birth defects in Korea and those trends according to maternal  
16  
17 20 age.  
18  
19

20 21 Design: Retrospective national cohort study  
21

22 22 Setting: Database in Korean vital Statistics, between 2009 and 2015.  
23

24 23 Participants: 2,176 infant deaths and 4,343 fetal deaths caused by birth defects, among 3,181,145 total live births and 43,385 fetal  
25  
26 24 deaths during study periods  
27  
28

29  
30  
31 25 Methods: Infant and fetal mortality rates (IMRs and FMRs) by birth defects, from deaths caused by birth defects, were analyzed.  
32

33  
34 26 Those were compared, according to maternal age groups; '10-19 yr' (I), '20-29 yr' (II), '30-34 yr' (III), '35-39 yr' (IV), and '40-55 yr'  
35  
36 27 (V).  
37  
38

39 28 Main Outcome Measures: IMRs and FMRs by birth defects and comparison according to maternal age group.  
40  
41

1  
2  
3 29 Results: IMRs and FMRs by birth defects were 6.84 per 10,000 live births, and 13.47 per 10,000 total births. The most common  
4  
5 30 causes of infant deaths and fetal deaths by birth defect were anomaly of circulatory system (51.1%, IMR 3.5) and chromosomal  
6  
7 31 abnormality (33.1%, FMR 4.46), respectively. Among groups by maternal age, FMRs by birth defects were significantly higher in  
8  
9 32 group I and V, compared to it in group III, (Odd ratio (OR) 6.59, 95% CI 3.49-12.43 and 3.46, 95% CI 1.77-6.78, respectively). IMR  
10  
11 33 and FMR by nervous system anomaly were significantly higher in group I, with 3.63 (OR 2.0, 95% CI 1.97-2.03) and 29.84 (OR15.04,  
12  
13 34 95% CI 3.59-62.96), compared to 0.32 and 1.97 in group III.  
14  
15  
16  
17

18 35 Conclusion: FMRs by birth defects were the highest in extreme maternal age groups. Severe anomalies except chromosomal  
19  
20 36 abnormality were the most prevalent in teenage pregnancies.  
21  
22  
23  
24  
25  
26

#### 27 38 Strengths and limitations of this study

- 29 39 • This study is the first one that reports infant and fetal mortalities caused by birth defects in Korea, from the national vital  
30 40 statistics.
- 31 41 • This study compared the infant and fetal mortalities caused by birth defects, according to maternal age group, which showed  
32 42 higher prevalence of them in teenage pregnancies.
- 33 43 • The limitation of this study is that causes of fetal/infant deaths were mostly diagnosed clinically without autopsy and there is  
34 44 no available data about spontaneous or induced abortion in fetal deaths.



- 1  
2  
3 45 • The limitation of this study is that it does not show present prevalence of birth defects in live births.  
4  
5  
6 46  
7  
8

9 47 **Introduction**

10  
11 48 Birth defects (structural abnormalities, sensory changes, chromosomal abnormalities, metabolic abnormalities, and  
12  
13  
14 49 neurodevelopmental defects) are presented in approximately 2-3% of all births [1-3]. Severe birth defects account for 20-25% of  
15  
16  
17 50 perinatal mortality and they are leading causes of infant mortality, abortion, and stillbirth [2-5]. During the last decade, screening tests  
18  
19 51 and ultrasonography during pregnancy have been developed to detect birth defects. However, etiologies of 60-70% of birth defects  
20  
21 52 remain unknown.  
22

23  
24 53 In developed countries, birth defects surveillance systems have been developed to collect data on major structural birth defects and  
25  
26  
27 54 chromosomal abnormalities [6-8]. European registry reported that total and live birth prevalence of trisomies 21, 18 and 13 were  
28  
29 55 increased between 1990 and 2009, and those were mainly associated with increasing maternal age [9].  
30  
31

32 56 While the number of live births in Korea has been decreased, the number of maternal age has been increased [10, 11]. The prevalence  
33  
34 57 of birth defects in Korean live births has been reported before, using the data based on the National Health Insurance Corporation and  
35  
36  
37 58 medical institutes across the country [12, 13]. However, it is important to include stillbirths in addition to live births to account for all  
38  
39 59 pregnancies within birth defects. Although it is hard to include spontaneous abortion in the early stage of pregnancy, the investigation  
40  
41  
42  
43  
44  
45

1  
2  
3 60 of fetal death related with birth defect can be useful for estimating the prevalence of birth defects. In addition, investigation of infant  
4  
5 61 death related to birth defect can be valuable information for counseling parents, antenatally and postnatally.  
6  
7

8  
9 62 The aim of this study was to analyze the prevalence of fetal and infant deaths associated with birth defects, which are fetal/infant  
10  
11 63 mortality rates (FMR/IMR) by birth defect, and evaluate changes of those prevalence rates, according to maternal age.  
12  
13

#### 14 64 **Materials and Methods**

15  
16

17 65 This national cohort study was conducted by utilizing deidentified data about fetal deaths, infant deaths, and live births between 2009  
18  
19 66 and 2015 from 'Korean Vital Statistics' of the Korean Statistical Information Service [10]. Korean Vital Statistics is a nationwide  
20  
21 67 database developed to understand birth, death, marriage, and divorce in Korea. Data from Korean Vital Statistics are released monthly  
22  
23 68 and annually via a press release, on website (<http://kosis.kr>), and in online publications, such as 'Annual Report on Vital Statistics.'  
24  
25 69 Since 2007, surveys and statistical analysis methods for infant and maternal death have been revised and complemented [14] to  
26  
27 70 develop into a method for calculating more concrete, accurate numbers for fetal, infant, and maternal mortality rates in Korea. In  
28  
29 71 summary, revision and supplementation of the statistics for fetal, infant and maternal death have been performed and validated by  
30  
31 72 combination of official death registry data for vital statistics, survey data of public health center or medical institution, medical  
32  
33 73 insurance claims database of the National Health Insurance Corporation on medical institutes across the country, and cremation  
34  
35 74 reports data. Because national data about fetal death has been included since 2009, study cohort for this study was made by data  
36  
37 75 between 2009 and 2015. However, data did not include information whether the cause of death was proven by autopsy. From fetal  
38  
39  
40  
41  
42  
43  
44  
45

1  
2  
3 76 and infant deaths data, fetal and infant death recorded as ‘a death caused by birth defect’ were included in fetal and infant deaths  
4  
5 77 associated with birth defect. Fetal death was defined as intrauterine fetal death occurring after 16 weeks of gestational age and before  
6  
7 78 the start of delivery or those occurring during labor. Infant death was defined as a death occurring within the first year of life.  
8  
9  
10  
11 79 Birth defects were categorized by birth defect group (the system affected) and subtype (individual disease) according to the 10th  
12  
13 80 Revision of the International Classification of Diseases (ICD-10) and were investigated by including major groups of birth defects  
14  
15 81 managed by EUROCAT, ICBDSR, and the National Birth Defects Prevention Network (NBDPN). Deaths caused by disease code ‘Q’  
16  
17 82 representing congenital disease were defined as fetal and infant deaths related to birth defect. According to the above standards, 2,176  
18  
19 83 infant deaths and 4,343 fetal deaths were caused by birth defect. This study calculated IMR by birth defects by dividing the number of  
20  
21 84 infant deaths related to birth defects by the total number of live births. It was presented as the number per 10,000 live births as a  
22  
23 85 standard. FMR by birth defects was calculated by dividing the number of fetal deaths related with birth defect by the total number of  
24  
25 86 live births and fetal deaths, which presented as the number per 10,000 total births. Maternal age groups were divided to the following  
26  
27 87 five groups: ‘10-19 yr’ (I), ‘20-29 yr’ (II), ‘30-34 yr’ (III), ‘35-39 yr’ (IV), and ‘40-55 yr’ (V). IMRs and FMRs by birth defects in  
28  
29 88 group III were used as control for comparison with IMRs/FMRs of other groups. For chromosomal abnormalities, comparison was  
30  
31 89 also performed between group II and the other groups.  
32  
33  
34  
35  
36  
37  
38  
39  
40  
41 91 **Statistical analysis**

1  
2  
3 92 Statistical calculations were performed using SPSS version 24.0 (SPSS Inc., Chicago, IL, USA), including means, proportions, odd  
4  
5 93 ratio (OR), and 95% confidence intervals (CIs). Chi-square tests were performed to compare proportions of independent variables and  
6  
7  
8 94 t-tests were performed to compare means. One decimal place was marked up in the presentation of maternal ages and gestational ages.  
9  
10 95 Statistical significance was considered at  $P < 0.05$  or if the 95% CI of OR did not include 1.  
11  
12

### 13 96 **Ethics statement**

14  
15  
16 97 The study protocol was approved by the institutional review board of Catholic University of Korea (KC17ZESI0409). Informed  
17  
18 98 consent was waived by the board.  
19  
20  
21  
22 99  
23  
24  
25 100  
26  
27  
28 101  
29  
30  
31 102  
32  
33  
34 103  
35  
36  
37 104  
38  
39  
40 105  
41  
42

## 106 **Results**

### 107 **Baseline characteristics**

108 Total numbers of live births and fetal deaths in Korea from 2009 to 2015 were 3,181,145 and 43,385, respectively. Among 9,563  
109 infant deaths during the 7 years, the number of infant deaths related to birth defect was 2,176, accounting for 22.8% of all infant  
110 deaths. The number of fetal deaths related to birth defects was 4,343, accounting for 10.0% of all fetal deaths. Baseline demographic  
111 characteristics are summarized in Table 1.

### 113 **IMRs, by birth defect groups and subtypes**

114 IMR by total birth defects was 6.84 per 10,000 live births (Table 2). Anomaly of the circulatory system was the most common cause  
115 of infant deaths related to birth defect, accounting for 51.1% of all infant deaths. Its IMR was 3.5 per 10,000 live births. The next most  
116 common defects in infant deaths were chromosomal abnormality (0.69 per 10,000 live births, 10.1%) and musculoskeletal system  
117 anomalies (0.65 per 10,000 live births, 9.6%). Among subtypes of birth defects, congenital diaphragmatic hernia (CDH) showed the  
118 highest IMR at 0.43 per 10,000 live births (supplementary material). Among specified anomalies, lethal birth defects with the next  
119 highest IMRs were Tetralogy of Fallot (TOF) and hypoplastic left heart syndrome (HLHS) (with IMRs of 0.28 and 0.27 per 10,000

1  
2  
3 120 live births, respectively). Among chromosomal abnormalities, Down syndrome was the most common chromosomal abnormality with  
4  
5 121 IMR of 0.27 per 10,000 live births (Table 3).  
6  
7

8 122

### 9 10 11 123 **FMRs by birth defect groups and subtypes**

12  
13  
14 124 FMR by total birth defects was 13.47 per 10,000 total births (live births plus stillbirths) (Table 2). The most common birth defect by  
15  
16 125 group was chromosomal abnormality, accounting for 33.1% of fetal deaths related to birth defect, and its FMR was 4.46 per 10,000  
17  
18 126 total births. The most common birth defect subtype in fetal deaths was Down syndrome with FMR of 1.78 per 10,000 total births, and  
19  
20 127 followed by other chromosomal abnormality, unspecified congenital heart malformation, and Edward syndrome, with FMR of 1.36,  
21  
22 128 0.93 and 0.82 per 10,000 total births, respectively (Table 3 and supplementary material).  
23  
24  
25

### 26 27 129 **IMRs and FMRs by birth defect groups, according to the maternal age group**

28  
29  
30 130 In the analysis according to maternal age group, 2,529 live births, 113 fetal deaths not related to birth defects, and 12 fetal deaths  
31  
32 131 related to birth defects were excluded due to missing values of maternal age. In infant deaths related to birth defect, anomaly of the  
33  
34 132 circulatory system was most common in all age groups (Table 4, Figure 1). IMRs of chromosomal abnormality seemed to be increased  
35  
36 133 in groups IV and V compared to that in group III. However, statistically significant difference was only observed between group V  
37  
38 134 and group III (OR 2.00 95% CI 1.97-2.03). The IMR of nervous system anomaly was significantly higher in the youngest maternal  
39  
40  
41  
42  
43  
44  
45

1  
2  
3 135 age group (group I, 10-19 yr) with 3.63 per 10,000 live births (OR 2.0, 95% CI 1.97-2.03), compared to that in group III (0.32 per  
4  
5  
6 136 10,000 live births). In fetal deaths related to birth defect, most FMRs by birth defects were highest in the youngest group, except for  
7  
8 137 FMR by chromosomal abnormality which was significantly higher in group V compared to that in group III (OR 7.01, 95% CI, 2.09-  
9  
10 138 23.52) (Table 5, Figure 2). Compared to FMR of group II, FMRs of chromosomal abnormality were significantly higher in group IV  
11  
12 139 and V (OR 5.00, 95% CI, 1.10-22.84 and OR 10.52, 95% CI 2.47-44.88, respectively). FMRs by total birth defects were significantly  
13  
14 140 higher in group I and V, compared to that in group III, (OR 6.59, 95% CI 3.49-12.43 and OR 3.46, 95% CI 1.77-6.78, respectively).  
15  
16 141 Individually, FMRs for anomalies of nervous system and cardiovascular system, and, other and unspecified anomalies were  
17  
18 142 significantly higher in group I, compared to those in group III, (OR 15.04, 95% CI 3.59-62.96; OR 10, 95%CI 1.23-78.2, and OR 8.35,  
19  
20 143 95% CI 2.52-27.67, respectively)  
21  
22  
23  
24  
25  
26  
27

## 28 145 **Discussion**

30  
31 146 It is important to know the types of severe birth defects which can lead fetal and infant deaths and their prevalence. Previously, the  
32  
33 147 prevalence of birth defects in Korea in live births in 2005 and 2006 was reported to be approximately 2.9% [12], similar to those (2-  
34  
35 148 3%) of other studies [1-3]. However, the other study reported the prevalence of birth defects in Korea in 2009 and 2010 as 5.8% [13].  
36  
37  
38 149 Although there might be methodological limitation and variations, the prenatal and postnatal detection rates of birth defects in live  
39  
40  
41  
42  
43  
44  
45

1  
2  
3 150 births seems increasing. In this study, 22.8% of infant deaths of Korea were related to birth defects. IMR and FMR caused by birth  
4  
5 151 defects between 2009 and 2015 were 6.84 per 10,000 live births and 13.47 per 10,000 total births, respectively.  
6  
7  
8 152 The most common birth defect group related to infant deaths was anomaly of the circulatory system. However, the most common birth  
9  
10 153 defect subtype was CDH. Despite advances in prenatal diagnosis and neonatal intensive care including extracorporeal membrane  
11  
12 154 oxygenation and inhaled nitric oxide use, mortality rates due to CDH remain high, ranging from 50% to 70% with great variability  
13  
14  
15 155 between centers [15-17]. The second most common birth defect in infant deaths related to birth defect was TOF. The 10-year survival  
16  
17 156 rate of TOF has been reported to be approximately 95 % [18, 19]. When we consider the prevalence of TOF in live births in Korea  
18  
19  
20 157 with 4.1-4.2 per 10,000 live births [12, 13] and the IMR by TOF with 0.28 per 10,000 live births in this study, we can speculate that  
21  
22 158 nationwide infant survival rates of TOF in Korea will be approximately 93.3%, which is similar to survival rates in the other reports  
23  
24  
25 159 [18, 19].  
26

27  
28 160 As expected, when IMRs and FMRs caused by birth defects were compared according to maternal age group, IMRs and FMRs due  
29  
30 161 to chromosomal abnormality were higher in older maternal age groups (IV and V) compared to those in group II or III. FMRs due to  
31  
32 162 birth defects were significantly higher in groups I and V compared to those in group III (OR: 6.59, 95% CI: 3.49-12.43 and OR: 3.46,  
33  
34 163 95% CI: 1.77-6.78, respectively). FMR was much higher in group I. Especially, IMR and FMR due to anomalies of the nervous  
35  
36  
37 164 system were significantly higher in group I compared with those in group III, indicating higher prevalence of severe anomalies of  
38  
39 165 nervous system in teenage pregnancies. In North America, fortification of flour and grain products became mandatory in 1998.  
40  
41  
42  
43  
44  
45



1  
2  
3 166 Following folic acid fortification, prevalence of spina bifida birth in Canada fell by over 50% and that of other neural tube defects  
4  
5 167 (NTDs) fell by approximately one-third [20]. In addition, the registry of ‘European surveillance of congenital anomalies’ has  
6  
7 168 concluded that mandatory folic acid fortification is needed because the prevalence of NTDs has not decreased in Europe despite  
8  
9 169 longstanding recommendations aiming at promoting periconceptional folic acid supplementation [21]. Results of Cochrane databases  
10  
11 170 systematic review also showed a protective effect of daily folic acid supplementation in preventing NTDs compared to no  
12  
13 171 intervention/placebo or vitamins and minerals without folic acid (risk ratio 0.31, 95% CI 0.17- 0.58); five studies; 6708 births; high  
14  
15 172 quality evidence) [22]. Teenage pregnancies are more likely unplanned and exposed to alcohol, drug, sexual abuse, and nutritional  
16  
17 173 imbalance. When pregnancies are complicated by birth defects in young age, they might be resulted in TOP, more easily. This study  
18  
19 174 demonstrated increasing trends of IMRs and FMRs due to birth defects in the youngest and oldest maternal age groups. However, high  
20  
21 175 IMRs and FMRs due to birth defects in the youngest age group were more pronounced except for chromosomal abnormality. It is  
22  
23 176 known that adolescent pregnancy is associated with higher risks of adverse neonatal outcomes, such as low birth weight, preterm  
24  
25 177 delivery [23]. In regard to birth defects, gastroschisis has been shown to be higher in young mothers [24, 25]. However, there has been  
26  
27 178 no other associations between young maternal age and any other birth defect, to our knowledge. Although it is unclear whether high  
28  
29 179 IMRs and FMRs related to birth defects in the youngest maternal age group in this study are associated maternal age, or other social,  
30  
31 180 nutritional, and environmental factors, further investigation might be needed in the future. In addition, mandatory folic acid  
32  
33 181 fortification in Korea might help reduce nervous system anomalies because the youngest age group is less likely to take  
34  
35 182 periconceptional folic acid supplementation and the overall prevalence of spina bifida in Korea shows increasing tendency [13].  
36  
37  
38  
39  
40  
41  
42  
43  
44  
45  
46  
47  
48  
49

1  
2  
3 183 In Europe, increasing trend of trisomy 13, 18, and 21 between 1990 and 2009 was reported [9]. In Korea, most of prenatal screening  
4  
5 184 methods are available, such as the first trimester combined test, Quad screening, integrated, sequential test and cell-free DNA  
6  
7  
8 185 screening [26]. However, the legally acceptable pregnancy termination is very restrictive in Korea. The maternal and child health law  
9  
10 186 only permits an abortion for one of the following reasons; if the pregnant woman or her spouse suffers from an eugenic or hereditary  
11  
12 187 mental or physical disease specified by presidential decree, if the woman or her spouse suffers from a communicable disease specified  
13  
14 188 by presidential decree, if the pregnancy results from rape or incest or if continuation of the pregnancy is likely to jeopardize the  
15  
16 189 mother's health. Therefore, it is almost impossible to estimate the proportions of TOP due to birth defects among fetal deaths. An  
17  
18 190 international study has reported that the total mean prevalence of Down syndrome (in stillbirths, live births, and TOP) is increased  
19  
20 191 from 13.1 to 18.2/10,000 births between 1993 and 2004 with increasing maternal age [27]. However, the total mean prevalence of  
21  
22 192 Down syndrome live births remains stable at 8.3/10,000 births, balanced by a great increase of TOP [27]. Maternal age at conception  
23  
24 193 has been increased in Korea, although there are race/ethnic specific variations in birth defects [28]. IMR and FMR by Down syndrome  
25  
26 194 were 0.27 per 10,000 live births and 1.78 per 10,000 total births, respectively. When we assume the prevalence of Down syndrome in  
27  
28 195 as 3.7-4.7 per 10,000 live births from the previous studies in Korea [12, 13], infant survival rate of Down syndrome can be estimated  
29  
30 196 approximately 93.6%. Based on the increased prevalence of Down syndrome in the international study, according to increasing  
31  
32 197 maternal age [27], we can expect that TOP due to Down syndrome may be also considerable in Korea.  
33  
34 198 The first limitation of this study is that death cause of fetal/infant deaths might be mostly made by clinician without autopsy. Although  
35  
36 199 most autopsies performed in the Republic of Korea are forensic autopsies, the autopsy rates for total mortality and unusual death in  
37  
38  
39  
40  
41  
42  
43  
44  
45  
46  
47  
48  
49

1  
2  
3 200 Korea were reported as 2.4% and 18.1%, respectively, in 2015, which were very low [29, 30]. It could be related with the  
4  
5 201 overwhelming majority of fetal losses due to unspecified nervous, cardiovascular, and other system. Because one or two disease  
6  
7 202 codes are registered as the main code in death registry, multiple anomalies might have been included in one category. The second  
8  
9 203 limitation of this study is that it does not show present prevalence of birth defects in live births. Therefore, it is necessary to establish a  
10  
11 204 comprehensive surveillance system with periodic production of data and monitoring to have effective prevention and management of  
12  
13 205 birth defects. Lastly, this study did not include data on maternal nationality, paternal age, educational background, antenatal care, or  
14  
15 206 parents' occupation due to high rates of missing values. However, this study is the first one that reports IMRs and FMRs caused by  
16  
17 207 birth defects in Korea and different patterns according to maternal age group. Severe birth defects with high FMR were found to be  
18  
19 208 more common in extreme maternal age groups (the youngest and the oldest). Except chromosomal abnormality, most severe  
20  
21 209 anomalies, especially those of the nervous system and cardiovascular system, were more common in teenage pregnancies.  
22  
23  
24  
25  
26

27 210 As maternal age at conception is getting increased in Korea and screening tools are developing, prevalence and prenatal diagnosis of  
28  
29 211 chromosomal abnormalities are likely to be increased. Multi-disciplinary cooperation among government, politician, clinicians, and  
30  
31 212 non-governmental organization is urgent not only for increasing fertility rate, but also for increasing healthy pregnancies with effective  
32  
33 213 prevention and management of birth defects, especially for extreme maternal age groups and for supporting complicated pregnancies.  
34  
35

36 214 A mandatory folic acid fortification needs to be discussed and considered in Korea.  
37  
38  
39  
40  
41  
42  
43  
44  
45

46  
47  
48  
49  
215

1  
2  
3 216 **Author contributions**  
4

5 217 We confirm that all the authors have made substantive intellectual contributions to the paper; they understand their role in taking  
6  
7  
8 218 responsibility and being accountable for what is published. JCS conceptualized and reviewed the paper. HSK and DJK conceptualized  
9  
10 219 the paper, gathered the results, analyzed the data and wrote the article. YHC, JHW, SKC, and IYP analyzed the data and reviewed the  
11  
12 220 paper. YGP performed statistical analysis of the data.  
13  
14

15 221

16  
17  
18 222 **Funding**  
19

20 223 This study was supported by Research Fund of Seoul St. Mary's Hospital, The Catholic University of Korea.  
21

22 224  
23

24 225 **Conflict of Interest**  
25

26 226 None declared.  
27  
28

29 227  
30

31 228 **Details of ethics approval**  
32

33 229 We obtained approval from the institutional review board of Catholic University of Korea (KC17ZESI0409).  
34  
35  
36

37 230 **Data sharing statement**  
38

39  
40 231 There is no data sharing.  
41  
42

## 232 References

- 233 **1** Honein MA, Paulozzi LJ, Cragan JD, Correa A. Evaluation of selected characteristics of pregnancy drug registries. *Teratology*  
234 1999;60:356-64.
- 235 **2** Kalter H, Warkany J. Congenital malformations (second of two parts). *N Engl J Med* 1983;308:491-7.
- 236 **3** Kalter H, Warkany J. Medical progress. Congenital malformations: etiologic factors and their role in prevention (first of two  
237 parts). *N Engl J Med* 1983;308:424-31.
- 238 **4** Petrini J, Damus K, Russell R, Poschman K, Davidoff MJ, Mattison D. Contribution of birth defects to infant mortality in the  
239 United States. *Teratology* 2002;66 Suppl 1:S3-6.
- 240 **5** Chung CS, Myriantopoulos NC. Congenital anomalies: mortality and morbidity, burden and classification. *Am J Med Genet*  
241 1987;27:505-23.
- 242 **6** Centers for Disease Control and Prevention (CDC). Improved national prevalence estimates for 18 selected major birth  
243 defects--United States, 1999-2001. *MMWR Morb Mortal Wkly Rep* 2006;54:1301-5.
- 244 **7** Bower C, D'Antoine H, Stanley FJ. Neural tube defects in Australia: trends in encephaloceles and other neural tube defects  
245 before and after promotion of folic acid supplementation and voluntary food fortification. *Birth Defects Res A Clin Mol Teratol*  
246 2009;85:269-73.
- 247 **8** Khoshnood B, Greenlees R, Loane M, Dolk H; on behalf of the EUROCAT Program Management Committee; EUROCAT

- 1  
2  
3 248 working group. Paper 2: EUROCAT public health indicators for congenital anomalies in Europe. *Birth Defects Res A Clin Mol*  
4  
5 249 *Teratol* 2011;91 Suppl 1:S16-22.  
6  
7  
8 250 **9** Loane M, Morris JK, Addor MC, Arriola L, Budd J, Doray B, et al. Twenty-year trends in the prevalence of Down syndrome  
9  
10 251 and other trisomies in Europe: impact of maternal age and prenatal screening. *Eur J Hum Genet* 2013;21:27-33.  
11  
12 252 **10** Statistics Korea. *Birth Statistics in 2009-2015*. Daejeon: Statistics Korea, 2009.  
13  
14  
15 253 **11** Choi SH, Park YS, Shim KS, Choi YS, Chang JY, Hahn WH, et al. Recent trends in the incidence of multiple births and its  
16  
17 254 consequences on perinatal problems in Korea. *J Korean Med Sci* 2010;25:1191-6.  
18  
19  
20 255 **12** Kim MA, Yee NH, Choi JS, Choi JY, Seo K. Prevalence of birth defects in Korean livebirths, 2005-2006. *J Korean Med Sci*  
21  
22 256 2012;27:1233-40.  
23  
24  
25 257 **13** Lamichhane DK, Leem JH, Park M, Kim JA, Kim HC, Kim JH, Hong YC. Increased prevalence of some birth defects in Korea,  
26  
27 258 2009-2010. *BMC Pregnancy Childbirth*. 2016 Mar 22;16:61. doi: 10.1186/s12884-016-0841-z  
28  
29  
30 259 **14** Statistics Korea. Causes of Death Statistics. Available at  
31  
32 260 <http://kostat.go.kr/portal/eng/surveyOutline/5/1/index.static> (accessed on 16 Aug, 2017)  
33  
34 261 **15** Park HW, Lee BS, Lim G, Choi YS, Kim EA, Kim KS. A simplified formula using early blood gas analysis can predict  
35  
36 262 survival outcomes and the requirements for extracorporeal membrane oxygenation in congenital diaphragmatic hernia. *J*  
37  
38 263 *Korean Med Sci* 2013;28:924-8.  
39  
40  
41 264 **16** Campbell BT, Herbst KW, Briden KE, Neff S, Ruscher KA, Hagadorn JI. Inhaled nitric oxide use in neonates with congenital  
42

- 1  
2  
3 265 diaphragmatic hernia. *Pediatrics* 2014;134:e420-6.  
4  
5  
6 266 **17** Lee JY, Jun JK, Lee J. Prenatal prediction of neonatal survival in cases diagnosed with congenital diaphragmatic hernia using  
7  
8 267 abdomen-to-thorax ratio determined by ultrasonography. *J Obstet Gynaecol Res* 2014;40:2037-43.  
9  
10 268 **18** Kim H, Sung SC, Kim SH, Chang YH, Lee HD, Park JA, et al. Early and late outcomes of total repair of tetralogy of Fallot:  
11  
12 269 risk factors for late right ventricular dilatation. *Interact Cardiovasc Thorac Surg* 2013;17:956-62.  
13  
14  
15 270 **19** Park CS, Lee JR, Lim HG, Kim WH, Kim YJ. The long-term result of total repair for tetralogy of Fallot. *Eur J Cardiothorac*  
16  
17 271 *Surg* 2010;38:311-7.  
18  
19  
20 272 **20** De Wals P, Tairou F, Van Allen MI, Uh SH, Lowry RB, Sibbald B, et al. Reduction in neural-tube defects after folic acid  
21  
22 273 fortification in Canada. *N Engl J Med* 2007;357:135-42.  
23  
24  
25 274 **21** Khoshnood B, Loane M, de Walle H, Arriola L, Addor MC, Barisic I, et al. Long term trends in prevalence of neural tube  
26  
27 275 defects in Europe: population based study. *Bmj* 2015;351:h5949.  
28  
29  
30 276 **22** De-Regil LM, Pena-Rosas JP, Fernandez-Gaxiola AC, Rayco-Solon P. Effects and safety of periconceptional oral folate  
31  
32 277 supplementation for preventing birth defects. *Cochrane Database Syst Rev* 2015:CD007950.  
33  
34  
35 278 **23.** Ganchimeg T, Ota E, Morisaki N, Laopaiboon M, Lumbiganon P, Zhang J, et al. Pregnancy and childbirth outcomes among  
36  
37 279 adolescent mothers: a World Health Organization multicountry study. *BJOG*. 2014;121 Suppl 1:40-8.  
38  
39 280 **24.** Vu LT, Nobuhara KK, Laurent C, Shaw GM. Increasing prevalence of gastroschisis: Population-based study in California. *J*  
40  
41 281 *Pediatr* 2008; 152: 807–11.  
42

- 1  
2  
3 282 **25.** Kirby RS, Marshall J, Tanner JP, Salemi JL, Feldkamp ML, Marengo L, et al. Prevalence and correlates of gastroschisis in 15  
4  
5 283 states, 1995 to 2005. *Obstet Gynecol* 2013; 122: 275–81.  
6  
7  
8 284 **26** Park SY, Jang IA, Lee MA, Kim YJ, Chun SH, Park MH. Screening for chromosomal abnormalities using combined test in the  
9  
10 285 first trimester of pregnancy. *Obstet Gynecol Sc.* 2016;59(5):357-66.  
11  
12 286 **27** Cocchi G, Gualdi S, Bower C, Halliday J, Jonsson B, Myrelid A, et al. International trends of Down syndrome 1993-2004:  
13  
14 287 Births in relation to maternal age and terminations of pregnancies. *Birth Defects Res A Clin Mol Teratol* 2010;88:474-9.  
15  
16  
17 288 **28** Canfield MA, Honein MA, Yuskiv N, Xing J, Mai CT, Collins JS, et al. National estimates and race/ethnic-specific variation of  
18  
19 289 selected birth defects in the United States, 1999-2001. *Birth Defects Res A Clin Mol Teratol* 2006;76:747-56.  
20  
21  
22 290 **29** Park, JH, Na JY, Lee BW, Chung NE, Choi YS. A Statistical Analysis on Forensic Autopsies Performed in Korea in 2015.  
23  
24 291 *Korean J Leg Med.* 2016;40(4):104-18  
25  
26  
27 292 **30** Hoyert DL. The changing profile of autopsied deaths in the United States, 1972-2007. *NCHS Data Brief* 2011;67:1–8.  
28  
29 293  
30  
31 294  
32  
33  
34 295  
35  
36 296  
37  
38 297  
39  
40  
41 298  
42



299

Table 1. Demographic characteristics of total live births, total fetal deaths, total infant deaths, and fetal/infant deaths related with birth defect

| Parameters              | Total live births | Total fetal deaths | Total infant deaths | Infant deaths    | Fetal deaths     |
|-------------------------|-------------------|--------------------|---------------------|------------------|------------------|
|                         |                   |                    |                     | by birth defects | by birth defects |
|                         | n=3,181,145       | n=43,385           | n=9563              | n=2,176          | n=4,343          |
| Maternal age (yr)       | 31.9 ± 26.7       | 30.7 ± 6.2         | 31.6 ± 5.0          | 31.7 ± 4.9       | 21.2 ± 4.4       |
| Gestational age (weeks) | 38.6 ± 2.3        | 20.1 ± 5.8         | 32.2 ± 6.6          | 35.9 ± 4.4       | 31.8 ± 5.6       |
| Birthweight (kg)        | 3.21 ± 0.48       | 0.69 ± 0.78        | 1.96 ± 1.15         | 2.47 ± 0.87      | 0.51 ± 0.5       |
| Multiple birth n (%)    | 101,797 (3.2)     | 3,818 (8.8)        | 1492 (15.6)         | 196 (9)          | 200 (4.6)        |

Data are mean ± standard deviation or no. (%) unless otherwise specified.

309

Table 2. Korean prevalence of fetal deaths and infant deaths caused by birth defect groups in 2009-2015

| Birth defects (ICD-10)             | Total N. of fetal and infant deaths caused by birth defect | Proportion (%) in birth defects | Prevalence per 10,000 live births and fetal deaths | N. of infant deaths caused by birth defect | Proportion (%) in birth defects | Prevalence per 10,000 live births | N. of fetal deaths caused by birth defect | Proportion (%) in birth defects | Prevalence per 10,000 total births |
|------------------------------------|------------------------------------------------------------|---------------------------------|----------------------------------------------------|--------------------------------------------|---------------------------------|-----------------------------------|-------------------------------------------|---------------------------------|------------------------------------|
| Nervous system (Q00-07)            | 970                                                        | 14.88                           | 3.01                                               | 136                                        | 6.25                            | 0.43                              | 834                                       | 19.20                           | 2.59                               |
| Eye, ear, face and neck (Q10-18)   | 8                                                          | 0.12                            | 0.02                                               | 1                                          | 0.05                            | 0.00                              | 7                                         | 0.16                            | 0.02                               |
| Circulatory system (Q20-28)        | 1605                                                       | 24.62                           | 4.98                                               | 1112                                       | 51.10                           | 3.50                              | 493                                       | 11.35                           | 1.53                               |
| Respiratory system (Q30-34)        | 115                                                        | 1.76                            | 0.36                                               | 87                                         | 4.00                            | 0.27                              | 28                                        | 0.64                            | 0.09                               |
| Cleft lip/ palate (Q35-37)         | 67                                                         | 1.03                            | 0.21                                               | 3                                          | 0.14                            | 0.01                              | 64                                        | 1.47                            | 0.20                               |
| Digestive system (Q38-45)          | 203                                                        | 3.11                            | 0.63                                               | 169                                        | 7.77                            | 0.53                              | 34                                        | 0.78                            | 0.11                               |
| Genital organs (Q50-56)            | 5                                                          | 0.08                            | 0.02                                               | 0                                          | 0.00                            | 0.00                              | 5                                         | 0.12                            | 0.02                               |
| Urinary system (Q60-64)            | 213                                                        | 3.27                            | 0.66                                               | 54                                         | 2.48                            | 0.17                              | 159                                       | 3.66                            | 0.49                               |
| Musculoskeletal system (Q65-79)    | 384                                                        | 5.89                            | 1.19                                               | 208                                        | 9.56                            | 0.65                              | 176                                       | 4.05                            | 0.55                               |
| Other and unspecified (Q80-89)     | 1291                                                       | 19.80                           | 4.00                                               | 186                                        | 8.55                            | 0.58                              | 1105                                      | 25.44                           | 3.43                               |
| Chromosomal abnormalities (Q90-99) | 1658                                                       | 25.43                           | 5.14                                               | 220                                        | 10.11                           | 0.69                              | 1438                                      | 33.11                           | 4.46                               |
| Total                              | 6519                                                       | 100.00                          | 20.22                                              | 2176                                       | 100.00                          | 2.64                              | 4343                                      | 100.00                          | 13.47                              |

ICD, International classification of diseases, 10th revision.

310

311

312

313

314

315

Table 3. Prevalence of infant and fetal deaths caused by major chromosomal abnormalities in Korea, 2009-2015

| Chromosomal birth defects             | Total N. of cases         | Proportion                 | Prevalence                | N. of infant deaths       | Proportion                 | Prevalence               | N. of fetal deaths        | Proportion                 | Prevalence                |
|---------------------------------------|---------------------------|----------------------------|---------------------------|---------------------------|----------------------------|--------------------------|---------------------------|----------------------------|---------------------------|
|                                       | caused by<br>birth defect | (%) in<br>birth<br>defects | per 10000<br>total births | caused by<br>birth defect | (%) in<br>birth<br>defects | per 10000<br>live births | caused by<br>birth defect | (%) in<br>birth<br>defects | per 10000<br>total births |
| Down's syndrome                       | 659                       | 10.11                      | 2.04                      | 85                        | 3.91                       | 0.27                     | 574                       | 13.22                      | 1.78                      |
| Trisomy 18                            | 340                       | 5.22                       | 1.05                      | 76                        | 3.49                       | 0.24                     | 264                       | 6.08                       | 0.82                      |
| Trisomy 13                            | 62                        | 0.95                       | 0.19                      | 21                        | 0.97                       | 0.07                     | 41                        | 0.94                       | 0.13                      |
| Klinefelter's syndrome                | 33                        | 0.51                       | 0.10                      | 0                         | 0.00                       | 0.00                     | 33                        | 0.76                       | 0.10                      |
| Turner's syndrome                     | 51                        | 0.78                       | 0.16                      | 0                         | 0.00                       | 0.00                     | 51                        | 1.17                       | 0.16                      |
| Other sex chromosome<br>abnormalities | 14                        | 0.21                       | 0.04                      | 0                         | 0.00                       | 0.00                     | 14                        | 0.32                       | 0.04                      |
| Triploidy                             | 14                        | 0.21                       | 0.04                      | 0                         | 0.00                       | 0.00                     | 14                        | 0.32                       | 0.04                      |
| Wolff-Hirschorn syndrome              | 5                         | 0.08                       | 0.02                      | 2                         | 0.09                       | 0.01                     | 3                         | 0.07                       | 0.01                      |
| Cri-du-chat syndrome                  | 5                         | 0.08                       | 0.02                      | 2                         | 0.09                       | 0.01                     | 3                         | 0.07                       | 0.01                      |
| Other chromosomal abnormalities       | 475                       | 7.29                       | 1.47                      | 34                        | 1.56                       | 0.11                     | 441                       | 10.15                      | 1.37                      |
| Total                                 | 1658                      | 25.43                      | 5.14                      | 220                       | 10.11                      | 0.69                     | 1438                      | 33.11                      | 4.46                      |

316

317

318

319

320

1  
2  
3 321  
4  
5  
6  
7  
8  
9  
10  
11  
12  
13  
14  
15  
16  
17  
18  
19  
20  
21  
22  
23  
24  
25  
26  
27  
28  
29  
30  
31  
32  
33 322  
34  
35 323  
36  
37 324  
38  
39 325  
40  
41 326  
42  
43  
44  
45  
46  
47  
48  
49

Table 4. Comparison of infant mortality by birth defect according to maternal age group

| Maternal age group                 | IMR               |                      |                    |                   |                     |                    |                   |                   |                      |  |
|------------------------------------|-------------------|----------------------|--------------------|-------------------|---------------------|--------------------|-------------------|-------------------|----------------------|--|
|                                    | I<br>(10-19<br>y) | OR<br>(95% CI)       | II<br>(20-29<br>y) | OR<br>(95%<br>CI) | III<br>(30-34<br>y) | IV<br>(35-39<br>y) | OR<br>(95%<br>CI) | V<br>(40-50<br>y) | OR<br>(95%<br>CI)    |  |
| Birth defects (ICD-10)             |                   |                      |                    |                   |                     |                    |                   |                   |                      |  |
| Nervous system (Q00-07)            | 3.63              | <b>2 (1.97-2.03)</b> | 0.42               |                   | 0.32                | 0.52               |                   | 1.21              |                      |  |
| Eye, ear, face and neck (Q10-18)   | 0.00              |                      | 0.00               |                   | 0.01                | 0.00               |                   | 0.00              |                      |  |
| Circulatory system (Q20-28)        | 7.25              |                      | 3.29               |                   | 3.25                | 4.10               |                   | 6.04              |                      |  |
| Respiratory system (Q30-34)        | 0.00              |                      | 0.23               |                   | 0.24                | 0.32               |                   | 1.21              |                      |  |
| Cleft lip/ palate (Q35-37)         | 0.00              |                      | 0.00               |                   | 0.02                | 0.00               |                   | 0.00              |                      |  |
| Digestive system (Q38-45)          | 0.52              |                      | 0.57               |                   | 0.48                | 0.63               |                   | 0.40              |                      |  |
| Urinary system (Q60-64)            | 0.52              |                      | 0.18               |                   | 0.14                | 0.15               |                   | 0.67              |                      |  |
| Musculoskeletal system (Q65-79)    | 0.00              |                      | 0.60               |                   | 0.64                | 0.84               |                   | 0.67              |                      |  |
| Other and unspecified (Q80-89)     | 1.55              |                      | 0.46               |                   | 0.56                | 0.73               |                   | 1.61              |                      |  |
| Chromosomal abnormalities (Q90-99) | 0.00              |                      | 0.48               |                   | 0.50                | 1.27               |                   | 3.63              | <b>2 (1.97-2.03)</b> |  |
| Total                              | 13.47             |                      | 6.22               |                   | 6.16                | 8.56               |                   | 15.44             |                      |  |

ICD, International classification of diseases, 10th revision; IMR, Infant mortality rate; OR, odd ratio; CI, confidence interval. IMRs by birth defects in group III were used as a reference for comparison with IMRs of other groups. Statistically significant values were presented.

327

Table 5. Comparison of fetal mortality by birth defect according to maternal age group

| Maternal age group                  | FMR               |                           |                 |                   |                     |                   |                 |                       |                   |                           |
|-------------------------------------|-------------------|---------------------------|-----------------|-------------------|---------------------|-------------------|-----------------|-----------------------|-------------------|---------------------------|
|                                     | I<br>(10-19<br>y) | OR<br>(95% CI)            | II<br>(20-29 y) | OR<br>(95%<br>CI) | III<br>(30-34<br>y) | OR<br>(95%<br>CI) | IV<br>(35-39 y) | OR<br>(95% CI)        | V<br>(40-50<br>y) | OR<br>(95% CI)            |
| Nervous system (Q00-07)             | 29.84             | <b>15.04 (3.59-62.96)</b> | 2.63            | ·                 | 1.97                | ·                 | 2.64            | ·                     | 5.97              | ·                         |
| Eye, ear, face and neck (Q10-18)    | 0.45              | ·                         | 0.03            | ·                 | 0.01                | ·                 | 0.02            | ·                     | 0.13              | ·                         |
| Circulatory system (Q20-28)         | 9.95              | <b>10 (1.23-78.20)</b>    | 1.48            | ·                 | 1.34                | ·                 | 1.83            | ·                     | 1.43              | ·                         |
| Respiratory system (Q30-34)         | 0.45              | ·                         | 0.12            | ·                 | 0.06                | ·                 | 0.09            | ·                     | 0.00              | ·                         |
| Cleft lip/ palate (Q35-37)          | 0.00              | ·                         | 0.27            | ·                 | 0.18                | ·                 | 0.17            | ·                     | 0.13              | ·                         |
| Digestive system (Q38-45)           | 1.36              | ·                         | 0.12            | ·                 | 0.06                | ·                 | 0.13            | ·                     | 0.13              | ·                         |
| Genital organs (Q50-56)             | 0.51              | ·                         | 0.01            | ·                 | 0.02                | ·                 | 0.02            | ·                     | 0.00              | ·                         |
| Urinary system (Q60-64)             | 0.00              | ·                         | 0.52            | ·                 | 0.49                | ·                 | 0.31            | ·                     | 1.17              | ·                         |
| Musculoskeletal system (Q65-79)     | 0.90              | ·                         | 0.64            | ·                 | 0.49                | ·                 | 0.50            | ·                     | 0.26              | ·                         |
| Other and unspecified (Q80-89)      | 24.87             | <b>8.35 (2.52-27.67)</b>  | 3.40            | ·                 | 2.66                | ·                 | 4.13            | ·                     | 7.92              | ·                         |
| Chromosomal abnormalities (Q90-99)  | 4.07              | ·                         | 1.87            | ·                 | 3.39                | ·                 | 10.11           | ·                     | 20.64             | <b>7.01 (2.09-23.52)</b>  |
| Chromosomal abnormalities (Q90-99)* | 4.07              | ·                         | 1.87            | ·                 | 3.39                | ·                 | 10.11           | <b>5 (1.10-22.84)</b> | 20.64             | <b>10.52 (2.47-44.88)</b> |
| Total                               | 71.89             | <b>6.59 (3.49-12.43)</b>  | 11.07           | ·                 | 10.68               | ·                 | 19.95           | ·                     | 37.78             | <b>3.46 (1.77-6.78)</b>   |

ICD, International classification of diseases, 10th revision; FMR, fetal mortality rate; OR, odd ratio; CI, confidence interval. FMRs by birth defects in group III were used as a reference for comparison with FMRs of other groups. \*Comparison was performed between group II (reference) and the other groups. Statistically significant values were presented.

328

1  
2  
3  
4  
5  
6  
7  
8  
9  
10  
11  
12  
13  
14  
15  
16  
17  
18  
19  
20  
21  
22  
23  
24  
25  
26  
27  
28  
29  
30  
31  
32  
33  
34  
35  
36  
37  
38  
39  
40  
41  
42  
43  
44  
45  
46  
47  
48  
49

329

330 Figure 1. Infant mortality caused by birth defects, according to maternal age group.

331 Maternal age groups: '10-19 yr' (I), '20-29 yr' (II), '30-34 yr' (III), '35-39 yr' (IV), and '40-55 yr' (V).

332

333

334

335

336 Figure 2. Fetal mortality caused by birth defects, according to maternal age group.

337 Maternal age groups: '10-19 yr' (I), '20-29 yr' (II), '30-34 yr' (III), '35-39 yr' (IV), and '40-55 yr' (V).

338

For peer review only

Figure 1. Infant mortality caused by birth defects, according to maternal age group.  
 Maternal age groups: '10-19 yr' (I), '20-29 yr' (II), '30-34 yr' (III), '35-39 yr' (IV), and '40-55 yr' (V).

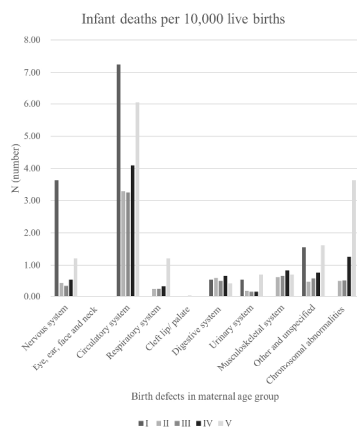

Figure 1. Infant mortality caused by birth defects, according to maternal age group.  
 Maternal age groups: '10-19 yr' (I), '20-29 yr' (II), '30-34 yr' (III), '35-39 yr' (IV), and '40-55 yr' (V).

338x190mm (300 x 300 DPI)

view only

1  
2  
3  
4  
5  
6  
7  
8  
9  
10  
11  
12  
13  
14  
15  
16  
17  
18  
19  
20  
21  
22  
23  
24  
25  
26  
27  
28  
29  
30  
31  
32  
33  
34  
35  
36  
37  
38  
39  
40  
41  
42  
43  
44  
45  
46  
47  
48  
49  
50  
51  
52  
53  
54  
55  
56  
57  
58  
59  
60

Figure 2. Fetal mortality caused by birth defects, according to maternal age group.  
Maternal age groups: '10-19 yr' (I), '20-29 yr' (II), '30-34 yr' (III), '35-39 yr' (IV), and '40-55 yr' (V).

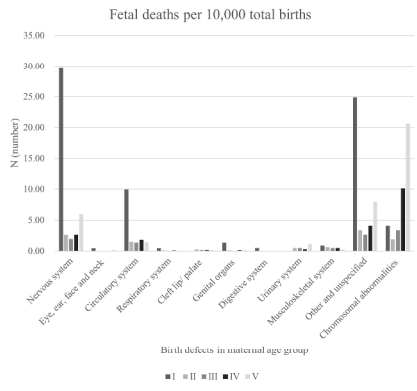

Figure 2. Fetal mortality caused by birth defects, according to maternal age group.  
Maternal age groups: '10-19 yr' (I), '20-29 yr' (II), '30-34 yr' (III), '35-39 yr' (IV), and '40-55 yr' (V).

338x190mm (300 x 300 DPI)

Review only



Supplementary material.

Korean prevalence of fetal deaths and infant deaths caused by birth defect subtypes in 2009-2015

|                                                          | N. of infant deaths | Proportion | Prevalence | N. of fetal deaths | Proportion | Prevalence   |
|----------------------------------------------------------|---------------------|------------|------------|--------------------|------------|--------------|
| Birth defects (ICD-10)                                   | caused by           | (%) in     | per 10000  | caused by          | (%) in     | per 10000    |
|                                                          | birth defect        | birth      | livebirths | birth defect       | birth      | total births |
|                                                          | defects             | defects    |            | defects            | defects    |              |
| <b>Nervous system (Q00-07)</b>                           |                     |            |            |                    |            |              |
| Anencephaly (Q00.0-00.2)                                 | 37                  | 1.70       | 0.12       | 213                | 4.90       | 0.66         |
| Encephalocele (Q01.0-01.9)                               | 3                   | 0.14       | 0.01       | 32                 | 0.74       | 0.10         |
| Congenital Hydrocephalus (Q03.0-03.9)                    | 34                  | 1.56       | 0.11       | 157                | 3.62       | 0.49         |
| Holoprosencephaly (Q04.0-04.2)                           | 14                  | 0.64       | 0.04       | 46                 | 1.06       | 0.14         |
| Other brain anomaly (Q43-49)                             | 36                  | 1.65       | 0.11       | 131                | 3.02       | 0.41         |
| Spina bifida (Q05.0-05.9)                                | 8                   | 0.37       | 0.03       | 28                 | 0.64       | 0.09         |
| Other spinal anomaly (Q68-69)                            | 0                   | 0.00       | 0.00       | 3                  | 0.07       | 0.01         |
| Arnold-Chiari malformation (Q70)                         | 1                   | 0.05       | 0.00       | 18                 | 0.41       | 0.06         |
| Other nervous system anomaly (Q78-79)                    | 3                   | 0.14       | 0.01       | 206                | 4.74       | 0.64         |
| <b>Eye, ear, face and neck (Q10-18)</b>                  | 1                   | 0.05       | 0.00       | 7                  | 0.16       | 0.02         |
| <b>Circulatory system (Q20-28)</b>                       |                     |            |            |                    |            |              |
| Truncus arteriosus (Q20.0)                               | 9                   | 0.41       | 0.03       | 1                  | 0.02       | 0.00         |
| Double outlet right ventricle                            | 66                  | 3.03       | 0.21       | 7                  | 0.16       | 0.02         |
| Transposition of great arteries (Q20.1-20.3)             | 72                  | 3.31       | 0.23       | 0                  | 0.00       | 0.00         |
| Double inlet ventricle (Q20.4)                           | 58                  | 2.67       | 0.18       | 1                  | 0.02       | 0.00         |
| Discordant atrioventricular connection (Q20.5)           | 2                   | 0.09       | 0.01       | 1                  | 0.02       | 0.00         |
| Isomerism of atrial appendages (Q20.6)                   | 3                   | 0.14       | 0.01       | 1                  | 0.02       | 0.00         |
| Ventricular septal defect (Q21.0)                        | 50                  | 2.30       | 0.16       | 20                 | 0.46       | 0.06         |
| Atrial septal defect (Q21.1)                             | 20                  | 0.92       | 0.06       | 2                  | 0.05       | 0.01         |
| Atrioventricular septal defect (Q21.2)                   | 72                  | 3.31       | 0.23       | 4                  | 0.09       | 0.01         |
| Tetralogy of Fallot (Q21.3)                              | 88                  | 4.04       | 0.28       | 21                 | 0.48       | 0.07         |
| Other malformations of cardiac septa (Q21.4, 21.8, 21.9) | 6                   | 0.28       | 0.02       | 10                 | 0.23       | 0.03         |
| Pulmonary valve atresia/stenosis (Q22.0-22.1)            | 52                  | 2.39       | 0.16       | 1                  | 0.02       | 0.00         |
| Congenital tricuspid stenosis (Q22.4)                    | 5                   | 0.23       | 0.02       | 1                  | 0.02       | 0.00         |
| Ebstein's anomaly (Q22.5)                                | 23                  | 1.06       | 0.07       | 7                  | 0.16       | 0.02         |
| Hypoplastic right heart syndrome (Q22.6)                 | 1                   | 0.05       | 0.00       | 1                  | 0.02       | 0.00         |
| Other malformations of tricuspid valve (Q22.8, 22.9)     | 3                   | 0.14       | 0.01       | 4                  | 0.09       | 0.01         |
| Aortic valve stenosis/insufficiency (Q23.0, 23.1)        | 9                   | 0.41       | 0.03       | 3                  | 0.07       | 0.01         |

|    |                                                                                                        |    |      |      |     |      |      |
|----|--------------------------------------------------------------------------------------------------------|----|------|------|-----|------|------|
| 1  |                                                                                                        |    |      |      |     |      |      |
| 2  |                                                                                                        |    |      |      |     |      |      |
| 3  |                                                                                                        |    |      |      |     |      |      |
| 4  | Mitral valve stenosis/insufficiency (Q23.2, 23.3)                                                      | 8  | 0.37 | 0.03 | 0   | 0.00 | 0.00 |
| 5  | Hypoplastic left heart syndrome (Q23.4)                                                                | 86 | 3.95 | 0.27 | 7   | 0.16 | 0.02 |
| 6  | Dextrocardia (Q 24.0)                                                                                  | 0  | 0.00 | 0.00 | 3   | 0.07 | 0.01 |
| 7  | Cor triatrium (Q 24.2)                                                                                 | 2  | 0.09 | 0.01 | 0   | 0.00 | 0.00 |
| 8  |                                                                                                        |    |      |      |     |      |      |
| 9  | Subaortic stenosis (Q 24.4)                                                                            | 2  | 0.09 | 0.01 | 0   | 0.00 | 0.00 |
| 10 |                                                                                                        |    |      |      |     |      |      |
| 11 | Malformation of coronary vessels (Q24.5-24.6)                                                          | 6  | 0.28 | 0.02 | 0   | 0.00 | 0.00 |
| 12 |                                                                                                        |    |      |      |     |      |      |
| 13 | Other heart malformation (Q24.2, 24.4-24.6)                                                            | 88 | 4.04 | 0.28 | 50  | 1.15 | 0.16 |
| 14 | Unspecified heart malformation (Q24.9)                                                                 | 75 | 3.45 | 0.24 | 299 | 6.88 | 0.93 |
| 15 | Patent ductus arteriosus (Q25.0)*                                                                      | 87 | 4.00 | 0.27 | 0   | 0.00 | 0.00 |
| 16 |                                                                                                        |    |      |      |     |      |      |
| 17 | Coarctation/atresia/stenosis of aorta (Q25.1-25.3)                                                     | 55 | 2.53 | 0.17 | 0   | 0.00 | 0.00 |
| 18 |                                                                                                        |    |      |      |     |      |      |
| 19 | Other malformations of aorta (Q25.4)                                                                   | 18 | 0.83 | 0.06 | 4   | 0.09 | 0.01 |
| 20 |                                                                                                        |    |      |      |     |      |      |
| 21 | Pulmonary artery atresia/stenosis (Q25.5, 25.6)                                                        | 22 | 1.01 | 0.07 | 2   | 0.05 | 0.01 |
| 22 |                                                                                                        |    |      |      |     |      |      |
| 23 | Total anomalous pulmonary venous connection (Q26.2)                                                    | 83 | 3.81 | 0.26 | 0   | 0.00 | 0.00 |
| 24 | Partial anomalous pulmonary venous connection (Q26.3)                                                  | 3  | 0.14 | 0.01 | 1   | 0.02 | 0.00 |
| 25 | Peripheral arteriovenous malformation (Q27.3, 27.9, 27.9)                                              | 1  | 0.05 | 0.00 | 4   | 0.09 | 0.01 |
| 26 |                                                                                                        |    |      |      |     |      |      |
| 27 | Malformations of cerebral vessels (Q 28.2, 28.3)                                                       | 6  | 0.28 | 0.02 | 4   | 0.09 | 0.01 |
| 28 |                                                                                                        |    |      |      |     |      |      |
| 29 | Other malformations of circulatory system (Q20.8, 20.9, 22.3, 25.7-26.1, 26.4, 27.0, 26.8, 28.8, 28.9) | 31 | 1.42 | 0.10 | 34  | 0.78 | 0.11 |
| 30 |                                                                                                        |    |      |      |     |      |      |
| 31 |                                                                                                        |    |      |      |     |      |      |
| 32 | <b>Respiratory system (Q30-34)</b>                                                                     |    |      |      |     |      |      |
| 33 | Other malformations of larynx, bronchus, trachea (Q31.0-32.4)                                          | 34 | 1.56 | 0.11 | 3   | 0.07 | 0.01 |
| 34 |                                                                                                        |    |      |      |     |      |      |
| 35 | Congenital cystic lung (Q33.0)                                                                         | 5  | 0.23 | 0.02 | 5   | 0.12 | 0.02 |
| 36 |                                                                                                        |    |      |      |     |      |      |
| 37 | Other malformation of lung (Q33.1-33.9)                                                                | 42 | 1.93 | 0.13 | 16  | 0.37 | 0.05 |
| 38 | Other malformations of respiratory system (Q34)                                                        | 6  | 0.28 | 0.02 | 4   | 0.09 | 0.01 |
| 39 |                                                                                                        |    |      |      |     |      |      |
| 40 | <b>Cleft lip/palate (Q35-37)</b>                                                                       | 3  | 0.14 | 0.01 | 64  | 1.47 | 0.20 |
| 41 |                                                                                                        |    |      |      |     |      |      |
| 42 | <b>Digestive system (Q38-45)</b>                                                                       |    |      |      |     |      |      |
| 43 | Other malformation of mouths (Q38.5)                                                                   | 0  | 0.00 | 0.00 | 1   | 0.02 | 0.00 |
| 44 |                                                                                                        |    |      |      |     |      |      |
| 45 | Esophageal atresia/stenosis (Q39.0-39.2)                                                               | 34 | 1.56 | 0.11 | 6   | 0.14 | 0.02 |
| 46 | Malformation of upper elementary tract (Q40.0-40.9)                                                    | 3  | 0.14 | 0.01 | 3   | 0.07 | 0.01 |
| 47 |                                                                                                        |    |      |      |     |      |      |
| 48 | Duodenal atresia/stenosis (Q41.0)                                                                      | 3  | 0.14 | 0.01 | 7   | 0.16 | 0.02 |
| 49 |                                                                                                        |    |      |      |     |      |      |
| 50 | Small intestine atresia/stenosis (Q41.1-41.9)                                                          | 22 | 1.01 | 0.07 | 1   | 0.02 | 0.00 |
| 51 |                                                                                                        |    |      |      |     |      |      |
| 52 | Anorectal atresia/stenosis (Q42.0-42.3)                                                                | 2  | 0.09 | 0.01 | 2   | 0.05 | 0.01 |
| 53 |                                                                                                        |    |      |      |     |      |      |
| 54 | Congenital megacolon (Q43.1)                                                                           | 44 | 2.02 | 0.14 | 0   | 0.00 | 0.00 |
| 55 | Malrotation of colon (Q43.3)                                                                           | 9  | 0.41 | 0.03 | 0   | 0.00 | 0.00 |
| 56 |                                                                                                        |    |      |      |     |      |      |
| 57 | Persistent cloaca (Q43.7)                                                                              | 1  | 0.05 | 0.00 | 2   | 0.05 | 0.01 |
| 58 |                                                                                                        |    |      |      |     |      |      |
| 59 |                                                                                                        |    |      |      |     |      |      |
| 60 |                                                                                                        |    |      |      |     |      |      |

|    |                                                                   |    |      |      |    |           |
|----|-------------------------------------------------------------------|----|------|------|----|-----------|
| 1  |                                                                   |    |      |      |    |           |
| 2  |                                                                   |    |      |      |    |           |
| 3  |                                                                   |    |      |      |    |           |
| 4  | Other intestinal and bile duct malformation (Q43.8-44.3)          | 42 | 1.93 | 0.13 | 6  | 0.14 0.02 |
| 5  | Liver malformation (Q44.7)                                        | 4  | 0.18 | 0.01 | 0  | 0.00 0.00 |
| 6  |                                                                   |    |      |      |    |           |
| 7  | Other malformation of digestive system (Q 42.8, 43.0, 45.8, 45.9) | 5  | 0.23 | 0.02 | 6  | 0.14 0.02 |
| 8  |                                                                   |    |      |      |    |           |
| 9  | <b>Genital organs (Q50-56)</b>                                    | 0  | 0.00 | 0.00 | 5  | 0.12 0.02 |
| 10 |                                                                   |    |      |      |    |           |
| 11 | <b>Urinary system (Q60-64)</b>                                    |    |      |      |    |           |
| 12 | Renal agenesis (Q60.0-60.6)                                       | 22 | 1.01 | 0.07 | 44 | 1.01 0.14 |
| 13 | Autosomal recessive polycystic kidney (Q61.1)                     | 10 | 0.46 | 0.03 | 6  | 0.14 0.02 |
| 14 | Unspecified polycystic kidney (Q61.3)                             | 6  | 0.28 | 0.02 | 23 | 0.53 0.07 |
| 15 | Renal dysplasia (Q61.4)                                           | 6  | 0.28 | 0.02 | 30 | 0.69 0.09 |
| 16 | Cystic kidney (Q61.0, Q61.5-61.9)                                 | 1  | 0.05 | 0.00 | 3  | 0.07 0.01 |
| 17 | Congenital hydronephrosis (Q62.0-62.8)                            | 2  | 0.09 | 0.01 | 14 | 0.32 0.04 |
| 18 | Other renal anomaly (Q63.0, 63.2, 63.8, 63.9)                     | 3  | 0.14 | 0.01 | 30 | 0.69 0.09 |
| 19 | Posterior urethral valve (Q64.2)                                  | 3  | 0.14 | 0.01 | 3  | 0.07 0.01 |
| 20 | Congenital absence of bladder and urethra (Q64.5-64.9)            | 1  | 0.05 | 0.00 | 6  | 0.14 0.02 |
| 21 |                                                                   |    |      |      |    |           |
| 22 | <b>Musculoskeletal system (Q65-79)</b>                            |    |      |      |    |           |
| 23 |                                                                   |    |      |      |    |           |
| 24 | Club foot-talipes equinovarus (66.0)                              | 0  | 0.00 | 0.00 | 1  | 0.02 0.00 |
| 25 | Other congenital feet deformities (Q66.1-66.9)                    | 0  | 0.00 | 0.00 | 4  | 0.09 0.01 |
| 26 | Congenital deformities of skull, face, and jaw (Q67.0-67.4)       | 0  | 0.00 | 0.00 | 2  | 0.05 0.01 |
| 27 | Pectus carinatum (Q67.6)                                          | 2  | 0.09 | 0.01 | 0  | 0.00 0.00 |
| 28 | Other congenital musculoskeletal deformities (Q68.0-Q70.9)        | 0  | 0.00 | 0.00 | 12 | 0.28 0.04 |
| 29 | Total limb reduction defects (Q71.0-71.9, Q72.0-72.9, Q73.0-73.8) | 0  | 0.00 | 0.00 | 8  | 0.18 0.02 |
| 30 | Other malformation of limbs and pelvic girdle (Q74.0-Q74.2, 74.8) | 3  | 0.14 | 0.01 | 19 | 0.44 0.06 |
| 31 | Arthrogryposis multiplex congenita (Q74.3)                        | 4  | 0.18 | 0.01 | 1  | 0.02 0.00 |
| 32 | Craniosynostosis (Q75.0)                                          | 6  | 0.28 | 0.02 | 0  | 0.00 0.00 |
| 33 | Malformations of skull and face bones (Q75.1-75.9)                | 6  | 0.28 | 0.02 | 7  | 0.16 0.02 |
| 34 | Klippel-Feil syndrome (Q76.1)                                     | 2  | 0.09 | 0.01 | 0  | 0.00 0.00 |
| 35 | Malformations of spine and bony thorax (Q76.2-76.9)               | 2  | 0.09 | 0.01 | 7  | 0.16 0.02 |
| 36 | Achondrogenesis/Hypochondrogenesis (Q77.0)                        | 2  | 0.09 | 0.01 | 1  | 0.02 0.00 |
| 37 | Thanatophoric dysplasia (Q77.1)                                   | 7  | 0.32 | 0.02 | 20 | 0.46 0.06 |
| 38 | Asphyxiating thoracic dysplasia (Q77.2)                           | 1  | 0.05 | 0.00 | 3  | 0.07 0.01 |
| 39 | Achondroplasia/hypochondroplasia (Q77.4)                          | 3  | 0.14 | 0.01 | 9  | 0.21 0.03 |
| 40 | Osteogenesis imperfecta (Q78.0)                                   | 2  | 0.09 | 0.01 | 6  | 0.14 0.02 |
| 41 |                                                                   |    |      |      |    |           |
| 42 |                                                                   |    |      |      |    |           |
| 43 |                                                                   |    |      |      |    |           |
| 44 |                                                                   |    |      |      |    |           |
| 45 |                                                                   |    |      |      |    |           |
| 46 |                                                                   |    |      |      |    |           |
| 47 |                                                                   |    |      |      |    |           |
| 48 |                                                                   |    |      |      |    |           |
| 49 |                                                                   |    |      |      |    |           |
| 50 |                                                                   |    |      |      |    |           |
| 51 |                                                                   |    |      |      |    |           |
| 52 |                                                                   |    |      |      |    |           |
| 53 |                                                                   |    |      |      |    |           |
| 54 |                                                                   |    |      |      |    |           |
| 55 |                                                                   |    |      |      |    |           |
| 56 |                                                                   |    |      |      |    |           |
| 57 |                                                                   |    |      |      |    |           |
| 58 |                                                                   |    |      |      |    |           |
| 59 |                                                                   |    |      |      |    |           |
| 60 |                                                                   |    |      |      |    |           |

|    |                                                 |     |       |      |      |       |      |
|----|-------------------------------------------------|-----|-------|------|------|-------|------|
| 1  |                                                 |     |       |      |      |       |      |
| 2  |                                                 |     |       |      |      |       |      |
| 3  |                                                 |     |       |      |      |       |      |
| 4  | Other osteochondrodysplasia (Q77.8, 78.8, 78.9) | 2   | 0.09  | 0.01 | 4    | 0.09  | 0.01 |
| 5  | Diaphragmatic hernia (Q79.0)                    | 138 | 6.34  | 0.43 | 22   | 0.51  | 0.07 |
| 6  | Other malformations of diaphragm (Q79.1)        | 6   | 0.28  | 0.02 | 1    | 0.02  | 0.00 |
| 7  | Omphalocele (Q79.2)                             | 10  | 0.46  | 0.03 | 15   | 0.35  | 0.05 |
| 8  | Gastroschisis (Q79.3)                           | 8   | 0.37  | 0.03 | 12   | 0.28  | 0.04 |
| 9  | Prune belly syndrome (Q79.4)                    | 0   | 0.00  | 0.00 | 3    | 0.07  | 0.01 |
| 10 | Other musculoskeletal anomaly (Q79.8, 79.9)     | 4   | 0.18  | 0.01 | 19   | 0.44  | 0.06 |
| 11 | <b>Other and unspecified (Q80-89)</b>           | 186 | 8.55  | 0.58 | 1105 | 25.44 | 3.43 |
| 12 | <b>Chromosomal abnormalities (Q90-99)</b>       | 220 | 10.11 | 0.69 | 1438 | 33.11 | 4.46 |

\*Patent ductus arteriosus cases included 81 cases whose birthweight was less than 2,500 g.

N, number.

**STROBE 2007 (v4) checklist of items to be included in reports of observational studies in epidemiology\***  
**Checklist for cohort, case-control, and cross-sectional studies (combined)**

| Section/Topic             | Item # | Recommendation                                                                                                                                                                                                                                                                                                                                                                                                                                                         | Reported on page # |
|---------------------------|--------|------------------------------------------------------------------------------------------------------------------------------------------------------------------------------------------------------------------------------------------------------------------------------------------------------------------------------------------------------------------------------------------------------------------------------------------------------------------------|--------------------|
| Title and abstract        | 1      | (a) Indicate the study's design with a commonly used term in the title or the abstract                                                                                                                                                                                                                                                                                                                                                                                 | 1,2                |
|                           |        | (b) Provide in the abstract an informative and balanced summary of what was done and what was found                                                                                                                                                                                                                                                                                                                                                                    | 2                  |
| <b>Introduction</b>       |        |                                                                                                                                                                                                                                                                                                                                                                                                                                                                        |                    |
| Background/rationale      | 2      | Explain the scientific background and rationale for the investigation being reported                                                                                                                                                                                                                                                                                                                                                                                   | 3,4                |
| Objectives                | 3      | State specific objectives, including any pre-specified hypotheses                                                                                                                                                                                                                                                                                                                                                                                                      | 4                  |
| <b>Methods</b>            |        |                                                                                                                                                                                                                                                                                                                                                                                                                                                                        |                    |
| Study design              | 4      | Present key elements of study design early in the paper                                                                                                                                                                                                                                                                                                                                                                                                                | 4,5                |
| Setting                   | 5      | Describe the setting, locations, and relevant dates, including periods of recruitment, exposure, follow-up, and data collection                                                                                                                                                                                                                                                                                                                                        | 4,5                |
| Participants              | 6      | (a) <i>Cohort study</i> —Give the eligibility criteria, and the sources and methods of selection of participants. Describe methods of follow-up<br><i>Case-control study</i> —Give the eligibility criteria, and the sources and methods of case ascertainment and control selection. Give the rationale for the choice of cases and controls<br><i>Cross-sectional study</i> —Give the eligibility criteria, and the sources and methods of selection of participants | 4,5                |
|                           |        | (b) <i>Cohort study</i> —For matched studies, give matching criteria and number of exposed and unexposed<br><i>Case-control study</i> —For matched studies, give matching criteria and the number of controls per case                                                                                                                                                                                                                                                 |                    |
| Variables                 | 7      | Clearly define all outcomes, exposures, predictors, potential confounders, and effect modifiers. Give diagnostic criteria, if applicable                                                                                                                                                                                                                                                                                                                               | 4,5                |
| Data sources/ measurement | 8*     | For each variable of interest, give sources of data and details of methods of assessment (measurement). Describe comparability of assessment methods if there is more than one group                                                                                                                                                                                                                                                                                   | 5                  |
| Bias                      | 9      | Describe any efforts to address potential sources of bias                                                                                                                                                                                                                                                                                                                                                                                                              | 5                  |
| Study size                | 10     | Explain how the study size was arrived at                                                                                                                                                                                                                                                                                                                                                                                                                              | 5                  |
| Quantitative variables    | 11     | Explain how quantitative variables were handled in the analyses. If applicable, describe which groupings were chosen and why                                                                                                                                                                                                                                                                                                                                           | 5                  |
| Statistical methods       | 12     | (a) Describe all statistical methods, including those used to control for confounding                                                                                                                                                                                                                                                                                                                                                                                  | 6                  |
|                           |        | (b) Describe any methods used to examine subgroups and interactions                                                                                                                                                                                                                                                                                                                                                                                                    | 6                  |
|                           |        | (c) Explain how missing data were addressed                                                                                                                                                                                                                                                                                                                                                                                                                            | 6                  |
|                           |        | (d) <i>Cohort study</i> —If applicable, explain how loss to follow-up was addressed<br><i>Case-control study</i> —If applicable, explain how matching of cases and controls was addressed                                                                                                                                                                                                                                                                              | Not applicable     |

|                          |     |                                                                                                                                                                                                              |       |
|--------------------------|-----|--------------------------------------------------------------------------------------------------------------------------------------------------------------------------------------------------------------|-------|
|                          |     | <i>Cross-sectional study</i> —If applicable, describe analytical methods taking account of sampling strategy                                                                                                 |       |
|                          |     | (e) Describe any sensitivity analyses                                                                                                                                                                        | 6     |
| <b>Results</b>           |     |                                                                                                                                                                                                              |       |
| Participants             | 13* | (a) Report numbers of individuals at each stage of study—eg numbers potentially eligible, examined for eligibility, confirmed eligible, included in the study, completing follow-up, and analysed            | 7     |
|                          |     | (b) Give reasons for non-participation at each stage                                                                                                                                                         | 7     |
|                          |     | (c) Consider use of a flow diagram                                                                                                                                                                           |       |
| Descriptive data         | 14* | (a) Give characteristics of study participants (eg demographic, clinical, social) and information on exposures and potential confounders                                                                     | 7     |
|                          |     | (b) Indicate number of participants with missing data for each variable of interest                                                                                                                          | 7     |
|                          |     | (c) <i>Cohort study</i> —Summarise follow-up time (eg, average and total amount)                                                                                                                             | 7     |
| Outcome data             | 15* | <i>Cohort study</i> —Report numbers of outcome events or summary measures over time                                                                                                                          | 7,8,9 |
|                          |     | <i>Case-control study</i> —Report numbers in each exposure category, or summary measures of exposure                                                                                                         |       |
|                          |     | <i>Cross-sectional study</i> —Report numbers of outcome events or summary measures                                                                                                                           |       |
| Main results             | 16  | (a) Give unadjusted estimates and, if applicable, confounder-adjusted estimates and their precision (eg, 95% confidence interval). Make clear which confounders were adjusted for and why they were included | 7-9   |
|                          |     | (b) Report category boundaries when continuous variables were categorized                                                                                                                                    | 7-9   |
|                          |     | (c) If relevant, consider translating estimates of relative risk into absolute risk for a meaningful time period                                                                                             | 7-9   |
| Other analyses           | 17  | Report other analyses done—eg analyses of subgroups and interactions, and sensitivity analyses                                                                                                               | 7-9   |
| <b>Discussion</b>        |     |                                                                                                                                                                                                              |       |
| Key results              | 18  | Summarise key results with reference to study objectives                                                                                                                                                     | 9-13  |
| Limitations              | 19  | Discuss limitations of the study, taking into account sources of potential bias or imprecision. Discuss both direction and magnitude of any potential bias                                                   | 9-13  |
| Interpretation           | 20  | Give a cautious overall interpretation of results considering objectives, limitations, multiplicity of analyses, results from similar studies, and other relevant evidence                                   | 9-13  |
| Generalisability         | 21  | Discuss the generalisability (external validity) of the study results                                                                                                                                        | 9-13  |
| <b>Other information</b> |     |                                                                                                                                                                                                              |       |
| Funding                  | 22  | Give the source of funding and the role of the funders for the present study and, if applicable, for the original study on which the present article is based                                                | 14    |

\*Give information separately for cases and controls in case-control studies and, if applicable, for exposed and unexposed groups in cohort and cross-sectional studies.

**Note:** An Explanation and Elaboration article discusses each checklist item and gives methodological background and published examples of transparent reporting. The STROBE checklist is best used in conjunction with this article (freely available on the Web sites of PLoS Medicine at <http://www.plosmedicine.org/>, Annals of Internal Medicine at <http://www.annals.org/>, and Epidemiology at <http://www.epidem.com/>). Information on the STROBE Initiative is available at [www.strobe-statement.org](http://www.strobe-statement.org).
