# Supplementary material for: A national cohort study evaluating infant and fetal mortality caused by birth defects in Korea
Source: PubMed Central journal article supplement — BMJ Open. 2017 Nov 15;7(11):e017963. doi: 10.1136/bmjopen-2017-017963 (PMC5695452; doi:10.1136/bmjopen-2017-017963), 2017-11-15
Supplement: bmjopen-2017-017963supp001.pdf [file bmjopen-2017-017963supp001.pdf]

## Supplementary material.

## Korean prevalence of fetal deaths and infant deaths caused by birth defect subtypes in 2009-2015

| Birth defects (ICD-10)                                   | N. of infant deaths<br>caused by<br>birth defect | Proportion<br>(%) in<br>birth<br>defects | Prevalence<br>per 10000<br>livebirths | N. of fetal<br>deaths<br>caused by<br>birth defect | Proportion<br>(%) in<br>birth<br>defects | Prevalence<br>per 10000<br>total births |
|----------------------------------------------------------|--------------------------------------------------|------------------------------------------|---------------------------------------|----------------------------------------------------|------------------------------------------|-----------------------------------------|
| <b>Nervous system (Q00-07)</b>                           |                                                  |                                          |                                       |                                                    |                                          |                                         |
| Anencephaly (Q00.0-00.2)                                 | 37                                               | 1.70                                     | 0.12                                  | 213                                                | 4.90                                     | 0.66                                    |
| Encephalocele (Q01.0-01.9)                               | 3                                                | 0.14                                     | 0.01                                  | 32                                                 | 0.74                                     | 0.10                                    |
| Congenital Hydrocephalus (Q03.0-03.9)                    | 34                                               | 1.56                                     | 0.11                                  | 157                                                | 3.62                                     | 0.49                                    |
| Holoprosencephaly (Q04.0-04.2)                           | 14                                               | 0.64                                     | 0.04                                  | 46                                                 | 1.06                                     | 0.14                                    |
| Other brain anomaly (Q43-49)                             | 36                                               | 1.65                                     | 0.11                                  | 131                                                | 3.02                                     | 0.41                                    |
| Spina bifida (Q05.0-05.9)                                | 8                                                | 0.37                                     | 0.03                                  | 28                                                 | 0.64                                     | 0.09                                    |
| Other spinal anomaly (Q68-69)                            | 0                                                | 0.00                                     | 0.00                                  | 3                                                  | 0.07                                     | 0.01                                    |
| Arnold-Chiari malformation (Q70)                         | 1                                                | 0.05                                     | 0.00                                  | 18                                                 | 0.41                                     | 0.06                                    |
| Other nervous system anomaly (Q78-79)                    | 3                                                | 0.14                                     | 0.01                                  | 206                                                | 4.74                                     | 0.64                                    |
| <b>Eye, ear, face and neck (Q10-18)</b>                  | 1                                                | 0.05                                     | 0.00                                  | 7                                                  | 0.16                                     | 0.02                                    |
| <b>Circulatory system (Q20-28)</b>                       |                                                  |                                          |                                       |                                                    |                                          |                                         |
| Truncus arteriosus (Q20.0)                               | 9                                                | 0.41                                     | 0.03                                  | 1                                                  | 0.02                                     | 0.00                                    |
| Double outlet right ventricle                            | 66                                               | 3.03                                     | 0.21                                  | 7                                                  | 0.16                                     | 0.02                                    |
| Transposition of great arteries (Q20.1-20.3)             | 72                                               | 3.31                                     | 0.23                                  | 0                                                  | 0.00                                     | 0.00                                    |
| Double inlet ventricle (Q20.4)                           | 58                                               | 2.67                                     | 0.18                                  | 1                                                  | 0.02                                     | 0.00                                    |
| Discordant atrioventricular connection (Q20.5)           | 2                                                | 0.09                                     | 0.01                                  | 1                                                  | 0.02                                     | 0.00                                    |
| Isomerism of atrial appendages (Q20.6)                   | 3                                                | 0.14                                     | 0.01                                  | 1                                                  | 0.02                                     | 0.00                                    |
| Ventricular septal defect (Q21.0)                        | 50                                               | 2.30                                     | 0.16                                  | 20                                                 | 0.46                                     | 0.06                                    |
| Atrial septal defect (Q21.1)                             | 20                                               | 0.92                                     | 0.06                                  | 2                                                  | 0.05                                     | 0.01                                    |
| Atrioventricular septal defect (Q21.2)                   | 72                                               | 3.31                                     | 0.23                                  | 4                                                  | 0.09                                     | 0.01                                    |
| Tetralogy of Fallot (Q21.3)                              | 88                                               | 4.04                                     | 0.28                                  | 21                                                 | 0.48                                     | 0.07                                    |
| Other malformations of cardiac septa (Q21.4, 21.8, 21.9) | 6                                                | 0.28                                     | 0.02                                  | 10                                                 | 0.23                                     | 0.03                                    |
| Pulmonary valve atresia/stenosis (Q22.0-22.1)            | 52                                               | 2.39                                     | 0.16                                  | 1                                                  | 0.02                                     | 0.00                                    |
| Congenital tricuspid stenosis (Q22.4)                    | 5                                                | 0.23                                     | 0.02                                  | 1                                                  | 0.02                                     | 0.00                                    |
| Ebstein's anomaly (Q22.5)                                | 23                                               | 1.06                                     | 0.07                                  | 7                                                  | 0.16                                     | 0.02                                    |
| Hypoplastic right heart syndrome (Q22.6)                 | 1                                                | 0.05                                     | 0.00                                  | 1                                                  | 0.02                                     | 0.00                                    |
| Other malformations of tricuspid valve (Q22.8, 22.9)     | 3                                                | 0.14                                     | 0.01                                  | 4                                                  | 0.09                                     | 0.01                                    |
| Aortic valve stenosis/insufficiency (Q23.0, 23.1)        | 9                                                | 0.41                                     | 0.03                                  | 3                                                  | 0.07                                     | 0.01                                    |

|                                                                                                        |    |      |      |     |      |      |
|--------------------------------------------------------------------------------------------------------|----|------|------|-----|------|------|
| Mitral valve stenosis/insufficiency (Q23.2, 23.3)                                                      | 8  | 0.37 | 0.03 | 0   | 0.00 | 0.00 |
| Hypoplastic left heart syndrome (Q23.4)                                                                | 86 | 3.95 | 0.27 | 7   | 0.16 | 0.02 |
| Dextrocardia (Q 24.0)                                                                                  | 0  | 0.00 | 0.00 | 3   | 0.07 | 0.01 |
| Cor triatrium (Q 24.2)                                                                                 | 2  | 0.09 | 0.01 | 0   | 0.00 | 0.00 |
| Subaortic stenosis (Q 24.4)                                                                            | 2  | 0.09 | 0.01 | 0   | 0.00 | 0.00 |
| Malformation of coronary vessels (Q24.5-24.6)                                                          | 6  | 0.28 | 0.02 | 0   | 0.00 | 0.00 |
| Other heart malformation (Q24.2, 24.4-24.6)                                                            | 88 | 4.04 | 0.28 | 50  | 1.15 | 0.16 |
| Unspecified heart malformation (Q24.9)                                                                 | 75 | 3.45 | 0.24 | 299 | 6.88 | 0.93 |
| Patent ductus arteriosus (Q25.0)*                                                                      | 87 | 4.00 | 0.27 | 0   | 0.00 | 0.00 |
| Coarctation/atresia/stenosis of aorta (Q25.1-25.3)                                                     | 55 | 2.53 | 0.17 | 0   | 0.00 | 0.00 |
| Other malformations of aorta (Q25.4)                                                                   | 18 | 0.83 | 0.06 | 4   | 0.09 | 0.01 |
| Pulmonary artery atresia/stenosis (Q25.5, 25.6)                                                        | 22 | 1.01 | 0.07 | 2   | 0.05 | 0.01 |
| Total anomalous pulmonary venous connection (Q26.2)                                                    | 83 | 3.81 | 0.26 | 0   | 0.00 | 0.00 |
| Partial anomalous pulmonary venous connection (Q26.3)                                                  | 3  | 0.14 | 0.01 | 1   | 0.02 | 0.00 |
| Peripheral arteriovenous malformation (Q27.3, 27.9, 27.9)                                              | 1  | 0.05 | 0.00 | 4   | 0.09 | 0.01 |
| Malformations of cerebral vessels (Q 28.2, 28.3)                                                       | 6  | 0.28 | 0.02 | 4   | 0.09 | 0.01 |
| Other malformations of circulatory system (Q20.8, 20.9, 22.3, 25.7-26.1, 26.4, 27.0, 26.8, 28.8, 28.9) | 31 | 1.42 | 0.10 | 34  | 0.78 | 0.11 |
| <b>Respiratory system (Q30-34)</b>                                                                     |    |      |      |     |      |      |
| Other malformations of larynx, bronchus, trachea (Q31.0-32.4)                                          | 34 | 1.56 | 0.11 | 3   | 0.07 | 0.01 |
| Congenital cystic lung (Q33.0)                                                                         | 5  | 0.23 | 0.02 | 5   | 0.12 | 0.02 |
| Other malformation of lung (Q33.1-33.9)                                                                | 42 | 1.93 | 0.13 | 16  | 0.37 | 0.05 |
| Other malformations of respiratory system (Q34)                                                        | 6  | 0.28 | 0.02 | 4   | 0.09 | 0.01 |
| <b>Cleft lip/palate (Q35-37)</b>                                                                       | 3  | 0.14 | 0.01 | 64  | 1.47 | 0.20 |
| <b>Digestive system (Q38-45)</b>                                                                       |    |      |      |     |      |      |
| Other malformation of mouths (Q38.5)                                                                   | 0  | 0.00 | 0.00 | 1   | 0.02 | 0.00 |
| Esophageal atresia/stenosis (Q39.0-39.2)                                                               | 34 | 1.56 | 0.11 | 6   | 0.14 | 0.02 |
| Malformation of upper elementary tract (Q40.0-40.9)                                                    | 3  | 0.14 | 0.01 | 3   | 0.07 | 0.01 |
| Duodenal atresia/stenosis (Q41.0)                                                                      | 3  | 0.14 | 0.01 | 7   | 0.16 | 0.02 |
| Small intestine atresia/stenosis (Q41.1-41.9)                                                          | 22 | 1.01 | 0.07 | 1   | 0.02 | 0.00 |
| Anorectal atresia/stenosis (Q42.0-42.3)                                                                | 2  | 0.09 | 0.01 | 2   | 0.05 | 0.01 |
| Congenital megacolon (Q43.1)                                                                           | 44 | 2.02 | 0.14 | 0   | 0.00 | 0.00 |
| Malrotation of colon (Q43.3)                                                                           | 9  | 0.41 | 0.03 | 0   | 0.00 | 0.00 |
| Persistent cloaca (Q43.7)                                                                              | 1  | 0.05 | 0.00 | 2   | 0.05 | 0.01 |

|                                                                   |    |      |      |    |      |      |
|-------------------------------------------------------------------|----|------|------|----|------|------|
| Other intestinal and bile duct malformation (Q43.8-44.3)          | 42 | 1.93 | 0.13 | 6  | 0.14 | 0.02 |
| Liver malformation (Q44.7)                                        | 4  | 0.18 | 0.01 | 0  | 0.00 | 0.00 |
| Other malformation of digestive system (Q 42.8, 43.0, 45.8, 45.9) | 5  | 0.23 | 0.02 | 6  | 0.14 | 0.02 |
| <b>Genital organs (Q50-56)</b>                                    | 0  | 0.00 | 0.00 | 5  | 0.12 | 0.02 |
| <b>Urinary system (Q60-64)</b>                                    |    |      |      |    |      |      |
| Renal agenesis (Q60.0-60.6)                                       | 22 | 1.01 | 0.07 | 44 | 1.01 | 0.14 |
| Autosomal recessive polycystic kidney (Q61.1)                     | 10 | 0.46 | 0.03 | 6  | 0.14 | 0.02 |
| Unspecified polycystic kidney (Q61.3)                             | 6  | 0.28 | 0.02 | 23 | 0.53 | 0.07 |
| Renal dysplasia (Q61.4)                                           | 6  | 0.28 | 0.02 | 30 | 0.69 | 0.09 |
| Cystic kidney (Q61.0, Q61.5-61.9)                                 | 1  | 0.05 | 0.00 | 3  | 0.07 | 0.01 |
| Congenital hydronephrosis (Q62.0-62.8)                            | 2  | 0.09 | 0.01 | 14 | 0.32 | 0.04 |
| Other renal anomaly (Q63.0, 63.2, 63.8, 63.9)                     | 3  | 0.14 | 0.01 | 30 | 0.69 | 0.09 |
| Posterior urethral valve (Q64.2)                                  | 3  | 0.14 | 0.01 | 3  | 0.07 | 0.01 |
| Congenital absence of bladder and urethra (Q64.5-64.9)            | 1  | 0.05 | 0.00 | 6  | 0.14 | 0.02 |
| <b>Musculoskeletal system (Q65-79)</b>                            |    |      |      |    |      |      |
| Club foot-talipes equinovarus (66.0)                              | 0  | 0.00 | 0.00 | 1  | 0.02 | 0.00 |
| Other congenital feet deformities (Q66.1-66.9)                    | 0  | 0.00 | 0.00 | 4  | 0.09 | 0.01 |
| Congenital deformities of skull, face, and jaw (Q67.0-67.4)       | 0  | 0.00 | 0.00 | 2  | 0.05 | 0.01 |
| Pectus carinatum (Q67.6)                                          | 2  | 0.09 | 0.01 | 0  | 0.00 | 0.00 |
| Other congenital musculoskeletal deformities (Q68.0-Q70.9)        | 0  | 0.00 | 0.00 | 12 | 0.28 | 0.04 |
| Total limb reduction defects (Q71.0-71.9, Q72.0-72.9, Q73.0-73.8) | 0  | 0.00 | 0.00 | 8  | 0.18 | 0.02 |
| Other malformation of limbs and pelvic girdle (Q74.0-Q74.2, 74.8) | 3  | 0.14 | 0.01 | 19 | 0.44 | 0.06 |
| Arthrogryposis multiplex congenita (Q74.3)                        | 4  | 0.18 | 0.01 | 1  | 0.02 | 0.00 |
| Craniosynostosis (Q75.0)                                          | 6  | 0.28 | 0.02 | 0  | 0.00 | 0.00 |
| Malformations of skull and face bones (Q75.1-75.9)                | 6  | 0.28 | 0.02 | 7  | 0.16 | 0.02 |
| Klippel-Feil syndrome (Q76.1)                                     | 2  | 0.09 | 0.01 | 0  | 0.00 | 0.00 |
| Malformations of spine and bony thorax (Q76.2-76.9)               | 2  | 0.09 | 0.01 | 7  | 0.16 | 0.02 |
| Achondrogenesis/Hypochondrogenesis (Q77.0)                        | 2  | 0.09 | 0.01 | 1  | 0.02 | 0.00 |
| Thanatophoric dysplasia (Q77.1)                                   | 7  | 0.32 | 0.02 | 20 | 0.46 | 0.06 |
| Asphyxiating thoracic dysplasia (Q77.2)                           | 1  | 0.05 | 0.00 | 3  | 0.07 | 0.01 |
| Achondroplasia/hypochondroplasia (Q77.4)                          | 3  | 0.14 | 0.01 | 9  | 0.21 | 0.03 |
| Osteogenesis imperfecta (Q78.0)                                   | 2  | 0.09 | 0.01 | 6  | 0.14 | 0.02 |

|                                                 |     |       |      |      |       |      |
|-------------------------------------------------|-----|-------|------|------|-------|------|
| Other osteochondrodysplasia (Q77.8, 78.8, 78.9) | 2   | 0.09  | 0.01 | 4    | 0.09  | 0.01 |
| Diaphragmatic hernia (Q79.0)                    | 138 | 6.34  | 0.43 | 22   | 0.51  | 0.07 |
| Other malformations of diaphragm (Q79.1)        | 6   | 0.28  | 0.02 | 1    | 0.02  | 0.00 |
| Omphalocele (Q79.2)                             | 10  | 0.46  | 0.03 | 15   | 0.35  | 0.05 |
| Gastroschisis (Q79.3)                           | 8   | 0.37  | 0.03 | 12   | 0.28  | 0.04 |
| Prune belly syndrome (Q79.4)                    | 0   | 0.00  | 0.00 | 3    | 0.07  | 0.01 |
| Other musculoskeletal anomaly (Q79.8, 79.9)     | 4   | 0.18  | 0.01 | 19   | 0.44  | 0.06 |
| <b>Other and unspecified (Q80-89)</b>           | 186 | 8.55  | 0.58 | 1105 | 25.44 | 3.43 |
| <b>Chromosomal abnormalities (Q90-99)</b>       | 220 | 10.11 | 0.69 | 1438 | 33.11 | 4.46 |

\*Patent ductus arteriosus cases included 81 cases whose birthweight was less than 2,500 g.

N, number.
